# Supplementary material for: Polygenic risk scores for the prediction of common cancers in East Asians: A population-based prospective cohort study
Source: eLife. 2023 Mar 27;12:e82608. doi: 10.7554/eLife.82608 (PMC10159619; doi:10.7554/eLife.82608)
Supplement: Supplementary file 1. [file elife-82608-supp1.xlsx]

## Sheet: a
Supplementary file 1a. Flowchart of participant eligibility criteria.
	Enrolled
	N=63,257
				Excluded (biosample)
				No blood samples	n=34,911
				Not genotyped	n=3,073
	Genotyped
	n=25,273
				Excluded (experiment)
				Call rate <95%	n=176
				Heterozygosity extremes	n=236
				Related samples	n=2,746
				Ethnic outliers	n=287
	Passed quality control
	n=21,828
				Excluded (study criteria)
				Cancer diagnosis before recruitment/ missing cancer status	n=134
	Analytical cohort
	n=21,694

## Sheet: b
Supplementary file 1b. Details of the 2166 polygenic risk scores (PRS) available on the Polygenic Score (PGS) catalog.
Polygenic Score (PGS) ID	PGS Name	Reported Trait	Mapped Trait(s) (EFO label)	Mapped Trait(s) (EFO ID)	PGS Development Method	PGS Development Details/Relevant Parameters	Original Genome Build	Number of Variants	Number of Interaction Terms	Type of Variant Weight	PGS Publication (PGP) ID	Publication (PMID)	Publication (doi)	Score and results match the original publication	Ancestry Distribution (%) - Source of Variant Associations (GWAS)	Ancestry Distribution (%) - Score Development/Training	Ancestry Distribution (%) - PGS Evaluation	FTP link	License/Terms of Use
PGS000001	PRS77_BC	Breast Cancer	breast carcinoma	EFO_0000305	SNPs passing genome-wide significance	P<5x10-8	NR	77	0	NR	PGP000001	25855707	10.1093/jnci/djv036	TRUE	European:100		European:100	https://ftp.ebi.ac.uk/pub/databases/spot/pgs/scores/PGS000001/ScoringFiles/PGS000001.txt.gz	PGS obtained from the Catalog should be cited appropriately, and used in accordance with any licensing restrictions set by the authors. See EBI Terms of Use (https://www.ebi.ac.uk/about/terms-of-use/) for additional details.
PGS000002	PRS77_ERpos	ER-positive Breast Cancer	estrogen-receptor positive breast cancer	EFO_1000649	SNPs passing genome-wide significance	P<5x10-8	NR	77	0	NR	PGP000001	25855707	10.1093/jnci/djv036	TRUE	European:100		European:100	https://ftp.ebi.ac.uk/pub/databases/spot/pgs/scores/PGS000002/ScoringFiles/PGS000002.txt.gz	PGS obtained from the Catalog should be cited appropriately, and used in accordance with any licensing restrictions set by the authors. See EBI Terms of Use (https://www.ebi.ac.uk/about/terms-of-use/) for additional details.
PGS000003	PRS77_ERneg	ER-negative Breast Cancer	estrogen-receptor negative breast cancer	EFO_1000650	SNPs passing genome-wide significance	P<5x10-8	NR	77	0	NR	PGP000001	25855707	10.1093/jnci/djv036	TRUE	European:100		European:100	https://ftp.ebi.ac.uk/pub/databases/spot/pgs/scores/PGS000003/ScoringFiles/PGS000003.txt.gz	PGS obtained from the Catalog should be cited appropriately, and used in accordance with any licensing restrictions set by the authors. See EBI Terms of Use (https://www.ebi.ac.uk/about/terms-of-use/) for additional details.
PGS000004	PRS313_BC	Breast Cancer	breast carcinoma	EFO_0000305	Hard-Thresholding Stepwise Forward Regression	p < 10^-5	GRCh37	313	0	NR	PGP000002	30554720	10.1016/j.ajhg.2018.11.002	TRUE	European:100	European:100	European:78.8|Additional Asian Ancestries:6.1|Multi-ancestry (including European):6.1|African:3|Hispanic or Latin American:3|Multi-ancestry (excluding European):3	https://ftp.ebi.ac.uk/pub/databases/spot/pgs/scores/PGS000004/ScoringFiles/PGS000004.txt.gz	PGS obtained from the Catalog should be cited appropriately, and used in accordance with any licensing restrictions set by the authors. See EBI Terms of Use (https://www.ebi.ac.uk/about/terms-of-use/) for additional details.
PGS000005	PRS313_ERpos	ER-positive Breast Cancer	estrogen-receptor positive breast cancer	EFO_1000649	Hard-Thresholding Stepwise Forward Regression	p < 10^-5	GRCh37	313	0	NR	PGP000002	30554720	10.1016/j.ajhg.2018.11.002	TRUE	European:100	European:100	European:94.7|Multi-ancestry (excluding European):5.3	https://ftp.ebi.ac.uk/pub/databases/spot/pgs/scores/PGS000005/ScoringFiles/PGS000005.txt.gz	PGS obtained from the Catalog should be cited appropriately, and used in accordance with any licensing restrictions set by the authors. See EBI Terms of Use (https://www.ebi.ac.uk/about/terms-of-use/) for additional details.
PGS000006	PRS313_ERneg	ER-negative Breast Cancer	estrogen-receptor negative breast cancer	EFO_1000650	Hard-Thresholding Stepwise Forward Regression	p < 10^-5	GRCh37	313	0	NR	PGP000002	30554720	10.1016/j.ajhg.2018.11.002	TRUE	European:100	European:100	European:92.3|Multi-ancestry (excluding European):7.7	https://ftp.ebi.ac.uk/pub/databases/spot/pgs/scores/PGS000006/ScoringFiles/PGS000006.txt.gz	PGS obtained from the Catalog should be cited appropriately, and used in accordance with any licensing restrictions set by the authors. See EBI Terms of Use (https://www.ebi.ac.uk/about/terms-of-use/) for additional details.
PGS000007	PRS3820_BC	Breast Cancer	breast carcinoma	EFO_0000305	LASSO penalized regression	p < 0.001	GRCh37	3820	0	NR	PGP000002	30554720	10.1016/j.ajhg.2018.11.002	TRUE	European:100	European:100	European:75|African:25	https://ftp.ebi.ac.uk/pub/databases/spot/pgs/scores/PGS000007/ScoringFiles/PGS000007.txt.gz	PGS obtained from the Catalog should be cited appropriately, and used in accordance with any licensing restrictions set by the authors. See EBI Terms of Use (https://www.ebi.ac.uk/about/terms-of-use/) for additional details.
PGS000008	PRS3820_ERpos	ER-positive Breast Cancer	estrogen-receptor positive breast cancer	EFO_1000649	LASSO penalized regression	p < 0.001	GRCh37	3820	0	NR	PGP000002	30554720	10.1016/j.ajhg.2018.11.002	TRUE	European:100	European:100	European:100	https://ftp.ebi.ac.uk/pub/databases/spot/pgs/scores/PGS000008/ScoringFiles/PGS000008.txt.gz	PGS obtained from the Catalog should be cited appropriately, and used in accordance with any licensing restrictions set by the authors. See EBI Terms of Use (https://www.ebi.ac.uk/about/terms-of-use/) for additional details.
PGS000009	PRS3820_ERneg	ER-negative Breast Cancer	estrogen-receptor negative breast cancer	EFO_1000650	LASSO penalized regression	p < 0.001	GRCh37	3820	0	NR	PGP000002	30554720	10.1016/j.ajhg.2018.11.002	TRUE	European:100	European:100	European:100	https://ftp.ebi.ac.uk/pub/databases/spot/pgs/scores/PGS000009/ScoringFiles/PGS000009.txt.gz	PGS obtained from the Catalog should be cited appropriately, and used in accordance with any licensing restrictions set by the authors. See EBI Terms of Use (https://www.ebi.ac.uk/about/terms-of-use/) for additional details.
PGS000010	GRS27	Coronary heart disease	coronary artery disease	EFO_0001645	Genome-wide significant SNPs		NR	27	0	NR	PGP000003	25748612	10.1016/S0140-6736(14)61730-X	TRUE	European:100		European:100	https://ftp.ebi.ac.uk/pub/databases/spot/pgs/scores/PGS000010/ScoringFiles/PGS000010.txt.gz	PGS obtained from the Catalog should be cited appropriately, and used in accordance with any licensing restrictions set by the authors. See EBI Terms of Use (https://www.ebi.ac.uk/about/terms-of-use/) for additional details.
PGS000011	GRS50	Coronary artery disease	coronary artery disease	EFO_0001645	Genome-wide significant SNPs	Also includes the SNPs from GRS 27 (Mega et al.; PMID:25748612)	NR	50	0	log(OR)	PGP000004	26392438	10.1093/eurheartj/ehv462	TRUE	Multi-ancestry (including European):53.3|European:40.3|South Asian:6.4		European:58.3|African:16.7|Hispanic or Latin American:16.7|Multi-ancestry (including European):8.3	https://ftp.ebi.ac.uk/pub/databases/spot/pgs/scores/PGS000011/ScoringFiles/PGS000011.txt.gz	PGS obtained from the Catalog should be cited appropriately, and used in accordance with any licensing restrictions set by the authors. See EBI Terms of Use (https://www.ebi.ac.uk/about/terms-of-use/) for additional details.
PGS000012	GRS49K	Coronary artery disease	coronary artery disease	EFO_0001645	LD thinning	r2 threshold = 0.7	hg19	49310	0	NR	PGP000005	27655226	10.1093/eurheartj/ehw450	TRUE	Multi-ancestry (including European):100	European:100	European:75|Multi-ancestry (including European):25	https://ftp.ebi.ac.uk/pub/databases/spot/pgs/scores/PGS000012/ScoringFiles/PGS000012.txt.gz	PGS obtained from the Catalog should be cited appropriately, and used in accordance with any licensing restrictions set by the authors. See EBI Terms of Use (https://www.ebi.ac.uk/about/terms-of-use/) for additional details.
PGS000013	GPS_CAD	Coronary artery disease	coronary artery disease	EFO_0001645	LDPred	ρ = 0.001; LD panel = 503 1000G Europeans	hg19	6630150	0	NR	PGP000006	30104762	10.1038/s41588-018-0183-z	TRUE	European:75.3|South Asian:13.6|East Asian:6|Hispanic or Latin American:2.2|African:1.7|Greater Middle Eastern:1.2	European:100	European:46.5|Multi-ancestry (including European):16.3|African:11.6|Hispanic or Latin American:11.6|South Asian:9.3|Additional Asian Ancestries:2.3|East Asian:2.3	https://ftp.ebi.ac.uk/pub/databases/spot/pgs/scores/PGS000013/ScoringFiles/PGS000013.txt.gz	Freely available to the academic community for research use. Parties interested in using the scores for commercial purposes should contact the Broad Office of Strategic Alliances and Partnering (partnering@broadinstitute.org).
PGS000014	GPS_T2D	Type 2 diabetes	type 2 diabetes mellitus	MONDO_0005148	LDPred	ρ = 0.01; LD panel = 503 1000G Europeans	hg19	6917436	0	NR	PGP000006	30104762	10.1038/s41588-018-0183-z	TRUE	European:100	European:100	European:100	https://ftp.ebi.ac.uk/pub/databases/spot/pgs/scores/PGS000014/ScoringFiles/PGS000014.txt.gz	Freely available to the academic community for research use. Parties interested in using the scores for commercial purposes should contact the Broad Office of Strategic Alliances and Partnering (partnering@broadinstitute.org).
PGS000015	GPS_BC	Breast cancer	breast carcinoma	EFO_0000305	Pruning and thresholding (P+T)	r2 < 0.2; P < 5e−4; LD panel = 503 100G Europeans	hg19	5218	0	NR	PGP000006	30104762	10.1038/s41588-018-0183-z	TRUE	European:100	European:100	European:50|African:25|Hispanic or Latin American:25	https://ftp.ebi.ac.uk/pub/databases/spot/pgs/scores/PGS000015/ScoringFiles/PGS000015.txt.gz	Freely available to the academic community for research use. Parties interested in using the scores for commercial purposes should contact the Broad Office of Strategic Alliances and Partnering (partnering@broadinstitute.org).
PGS000016	GPS_AF	Atrial fibrillation	atrial fibrillation	EFO_0000275	LDPred	ρ = 0.003; LD panel = 503 1000G Europeans	hg19	6730541	0	NR	PGP000006	30104762	10.1038/s41588-018-0183-z	TRUE	European:89.9|African:4.4|East Asian:3.1|Hispanic or Latin American:2.5	European:100	European:66.7|Not Reported:33.3	https://ftp.ebi.ac.uk/pub/databases/spot/pgs/scores/PGS000016/ScoringFiles/PGS000016.txt.gz	Freely available to the academic community for research use. Parties interested in using the scores for commercial purposes should contact the Broad Office of Strategic Alliances and Partnering (partnering@broadinstitute.org).
PGS000017	GPS_IBD	Inflammatory bowel disease	inflammatory bowel disease	EFO_0003767	LDPred	ρ = 0.1; LD panel = 503 1000G Europeans	hg19	6907112	0	NR	PGP000006	30104762	10.1038/s41588-018-0183-z	TRUE	European:100	European:100	European:100	https://ftp.ebi.ac.uk/pub/databases/spot/pgs/scores/PGS000017/ScoringFiles/PGS000017.txt.gz	Freely available to the academic community for research use. Parties interested in using the scores for commercial purposes should contact the Broad Office of Strategic Alliances and Partnering (partnering@broadinstitute.org).
PGS000018	metaGRS_CAD	Coronary artery disease	coronary artery disease	EFO_0001645	metaGRS	metaGRS log(HR) mixing weights: GRS46K=0.1278, FDR202=0.2359 and 1000Genomes=0.2400	hg19	1745179	0	NR	PGP000007	30309464	10.1016/j.jacc.2018.07.079	TRUE	Multi-ancestry (including European):50.9|European:37|South Asian:6.7|East Asian:3|Hispanic or Latin American:1.1|African:0.8|Greater Middle Eastern:0.6	Multi-ancestry (including European):100	European:66.7|African:11.1|Hispanic or Latin American:11.1|Multi-ancestry (including European):11.1	https://ftp.ebi.ac.uk/pub/databases/spot/pgs/scores/PGS000018/ScoringFiles/PGS000018.txt.gz	PGS obtained from the Catalog should be cited appropriately, and used in accordance with any licensing restrictions set by the authors. See EBI Terms of Use (https://www.ebi.ac.uk/about/terms-of-use/) for additional details.
PGS000019	GRS_CAD	Coronary artery disease	coronary artery disease	EFO_0001645	Genome-wide significant associations	FDR < 5%, r2 < 0.20	NR	192	0	NR	PGP000009	28456682	10.1016/j.jacl.2017.03.019	TRUE	European:75.3|South Asian:13.6|East Asian:6|Hispanic or Latin American:2.2|African:1.7|Greater Middle Eastern:1.2		European:100	https://ftp.ebi.ac.uk/pub/databases/spot/pgs/scores/PGS000019/ScoringFiles/PGS000019.txt.gz	PGS obtained from the Catalog should be cited appropriately, and used in accordance with any licensing restrictions set by the authors. See EBI Terms of Use (https://www.ebi.ac.uk/about/terms-of-use/) for additional details.
PGS000020	dGRS1000	Type 2 diabetes	type 2 diabetes mellitus	MONDO_0005148	P+T	P < 0.05, r2 < 0.05, betas are weighted by the probability that they are in the top 1000 signals	NCBI36	7502	0	NR	PGP000010	27513194	10.1038/gim.2016.103	TRUE	European:100		European:100	https://ftp.ebi.ac.uk/pub/databases/spot/pgs/scores/PGS000020/ScoringFiles/PGS000020.txt.gz	PGS obtained from the Catalog should be cited appropriately, and used in accordance with any licensing restrictions set by the authors. See EBI Terms of Use (https://www.ebi.ac.uk/about/terms-of-use/) for additional details.
PGS000021	GRS1	Type 1 diabetes	type 1 diabetes mellitus	MONDO_0005147	SNP associations curated from the literature	HLA Haplotypes called with SNP2HLA using the T1DGC reference panel	NR	30	0	NR	PGP000011	26577414	10.2337/dc15-1111	TRUE	European:100	European:100	European:75|African:25	https://ftp.ebi.ac.uk/pub/databases/spot/pgs/scores/PGS000021/ScoringFiles/PGS000021.txt.gz	PGS obtained from the Catalog should be cited appropriately, and used in accordance with any licensing restrictions set by the authors. See EBI Terms of Use (https://www.ebi.ac.uk/about/terms-of-use/) for additional details.
PGS000022	T1D_GRS	Type 1 diabetes	type 1 diabetes mellitus	MONDO_0005147	Genome-wide significant variants	Literature curated SNPs and HLA haplotypes. Based off of Oram et al. (2016; PMID:26577414) & Patel et al. (2016; PMID:27207547)	NR	37	0	NR	PGP000012	29540798	10.1038/s41598-018-22574-5	TRUE			African:33.3|Hispanic or Latin American:33.3|European:33.3	https://ftp.ebi.ac.uk/pub/databases/spot/pgs/scores/PGS000022/ScoringFiles/PGS000022.txt.gz	PGS obtained from the Catalog should be cited appropriately, and used in accordance with any licensing restrictions set by the authors. See EBI Terms of Use (https://www.ebi.ac.uk/about/terms-of-use/) for additional details.
PGS000023	AA_GRS	Type 1 diabetes	type 1 diabetes mellitus	MONDO_0005147	Genome-wide significant associations		NR	7	0	NR	PGP000013	30659077	10.2337/dc18-1727	TRUE	African:100		African:100	https://ftp.ebi.ac.uk/pub/databases/spot/pgs/scores/PGS000023/ScoringFiles/PGS000023.txt.gz	PGS obtained from the Catalog should be cited appropriately, and used in accordance with any licensing restrictions set by the authors. See EBI Terms of Use (https://www.ebi.ac.uk/about/terms-of-use/) for additional details.
PGS000024	GRS2	Type 1 diabetes	type 1 diabetes mellitus	MONDO_0005147	Genome-wide significant associations and interaction modelling	Significance threshold for interactions: p < 10^-4	NR	67	18	log(OR)	PGP000014	30655379	10.2337/dc18-1785	TRUE	European:100		European:85.7|Not Reported:14.3	https://ftp.ebi.ac.uk/pub/databases/spot/pgs/scores/PGS000024/ScoringFiles/PGS000024.txt.gz	PGS obtained from the Catalog should be cited appropriately, and used in accordance with any licensing restrictions set by the authors. See EBI Terms of Use (https://www.ebi.ac.uk/about/terms-of-use/) for additional details.
PGS000025	GRS	Alzheimer's Disease	Alzheimer disease	MONDO_0004975	log-OR weighted sum of risk allele dosages	Top SNP in each locus (+- 500kb around top SNP) reaching genome-wide significance, excluding APOE. Recoded the odds ratios (OR) from the IGAP meta-analysis so they would all indicate an increased risk of AD and used the log(OR)and corresponding alleles to compute a weighted sum of risk allele dosages. applied an additional transformation so that one unit of the GRS would be interpreted as one add…	GRCh37	19	0	NR	PGP000015	27340842	10.3233/JAD-150749	TRUE	European:100		European:100	https://ftp.ebi.ac.uk/pub/databases/spot/pgs/scores/PGS000025/ScoringFiles/PGS000025.txt.gz	PGS obtained from the Catalog should be cited appropriately, and used in accordance with any licensing restrictions set by the authors. See EBI Terms of Use (https://www.ebi.ac.uk/about/terms-of-use/) for additional details.
PGS000026	PHS	Alzheimer’s Disease	Alzheimer disease	MONDO_0004975	Hazard model with stepwise selection of SNP inclusion	SNPs eligible for inclusion had a significane of p < 10−5	NR	31	0	NR	PGP000016	28323831	10.1371/journal.pmed.1002258	TRUE	European:100	European:100	European:100	https://ftp.ebi.ac.uk/pub/databases/spot/pgs/scores/PGS000026/ScoringFiles/PGS000026.txt.gz	PGS obtained from the Catalog should be cited appropriately, and used in accordance with any licensing restrictions set by the authors. See EBI Terms of Use (https://www.ebi.ac.uk/about/terms-of-use/) for additional details.
PGS000027	GPS_BMI	Body Mass Index	body mass index	EFO_0004340	LDpred	ρ = 0.03; LD reference panel = 503 European samples from 1000 Genomes phase 3	hg19	2100302	0	NR	PGP000017	31002795	10.1016/j.cell.2019.03.028	TRUE	European:99.1|Hispanic or Latin American:0.5|African:0.4	European:100	European:90|Greater Middle Eastern:10	https://ftp.ebi.ac.uk/pub/databases/spot/pgs/scores/PGS000027/ScoringFiles/PGS000027.txt.gz	Freely available to the academic community for research use. Parties interested in using the scores for commercial purposes should contact the Broad Office of Strategic Alliances and Partnering (partnering@broadinstitute.org).
PGS000028	PRS	Breast cancer	breast carcinoma	EFO_0000305	composite likelihood ratio	SNPs with p<5x10-8 in studies of invasive breast cancer in Caucasian, Asian, or Hispanic populations, or proxy SNP on Illumina Oncoarray in strong LD (r2>0.9)	hg38	83	0	log(OR)	PGP000018	27565998	10.1007/s10549-016-3953-2	TRUE	European:80.7|East Asian:13.4|Hispanic or Latin American:3.3|African:2.6		East Asian:33.3|European:33.3|Multi-ancestry (including European):33.3	https://ftp.ebi.ac.uk/pub/databases/spot/pgs/scores/PGS000028/ScoringFiles/PGS000028.txt.gz	PGS obtained from the Catalog should be cited appropriately, and used in accordance with any licensing restrictions set by the authors. See EBI Terms of Use (https://www.ebi.ac.uk/about/terms-of-use/) for additional details.
PGS000029	PRS_AS	Breast cancer	breast carcinoma	EFO_0000305	composite likelihood ratio	SNPs with p<5x10-8 in studies of invasive breast cancer in Asian populations, or proxy SNP on Illumina Oncoarray in strong LD (r2>0.9)	hg38	76	0	log(OR)	PGP000018	27565998	10.1007/s10549-016-3953-2	TRUE	East Asian:100		East Asian:100	https://ftp.ebi.ac.uk/pub/databases/spot/pgs/scores/PGS000029/ScoringFiles/PGS000029.txt.gz	PGS obtained from the Catalog should be cited appropriately, and used in accordance with any licensing restrictions set by the authors. See EBI Terms of Use (https://www.ebi.ac.uk/about/terms-of-use/) for additional details.
PGS000030	PrCa	Prostate cancer	prostate carcinoma	EFO_0001663	Genome-wide significant SNPs		NR	147	0	NR	PGP000019	29892016	10.1038/s41588-018-0142-8	TRUE	European:100		European:100	https://ftp.ebi.ac.uk/pub/databases/spot/pgs/scores/PGS000030/ScoringFiles/PGS000030.txt.gz	PGS obtained from the Catalog should be cited appropriately, and used in accordance with any licensing restrictions set by the authors. See EBI Terms of Use (https://www.ebi.ac.uk/about/terms-of-use/) for additional details.
PGS000031	GRSt	Type 2 diabetes	type 2 diabetes mellitus	MONDO_0005148	Genome-wide significant SNPs	Index SNPs or their proxies	NCBI36	62	0	NR	PGP000020	24520119	10.2337/db13-1663	TRUE	European:100		European:66.7|African:33.3	https://ftp.ebi.ac.uk/pub/databases/spot/pgs/scores/PGS000031/ScoringFiles/PGS000031.txt.gz	PGS obtained from the Catalog should be cited appropriately, and used in accordance with any licensing restrictions set by the authors. See EBI Terms of Use (https://www.ebi.ac.uk/about/terms-of-use/) for additional details.
PGS000032	GRSB	Type 2 diabetes (based on SNPs involved in β-cell function)	type 2 diabetes mellitus	MONDO_0005148	Genome-wide significant SNPs	Index SNPs or their proxies (using T2D weights)	NR	20	0	NR	PGP000020	24520119	10.2337/db13-1663	TRUE	European:100		European:50|Not Reported:25|African:25	https://ftp.ebi.ac.uk/pub/databases/spot/pgs/scores/PGS000032/ScoringFiles/PGS000032.txt.gz	PGS obtained from the Catalog should be cited appropriately, and used in accordance with any licensing restrictions set by the authors. See EBI Terms of Use (https://www.ebi.ac.uk/about/terms-of-use/) for additional details.
PGS000033	GRSIR	Type 2 diabetes (based on SNPs involved in insulin resistance)	type 2 diabetes mellitus	MONDO_0005148	Genome-wide significant SNPs	Index SNPs or their proxies (using T2D weights)	NR	10	0	NR	PGP000020	24520119	10.2337/db13-1663	TRUE	European:100		European:66.7|African:33.3	https://ftp.ebi.ac.uk/pub/databases/spot/pgs/scores/PGS000033/ScoringFiles/PGS000033.txt.gz	PGS obtained from the Catalog should be cited appropriately, and used in accordance with any licensing restrictions set by the authors. See EBI Terms of Use (https://www.ebi.ac.uk/about/terms-of-use/) for additional details.
PGS000034	GRS_BMI	Adult Body Mass Index	body mass index	EFO_0004340	Genome-wide significant SNPs	The GRS is normalized by multiplying the weighted allele counts by the number of SNPs and their weights (97/sum( βi))	NR	97	0	NR	PGP000021	29212779	10.2337/db17-1156	TRUE	European:99.1|Hispanic or Latin American:0.5|African:0.4		European:100	https://ftp.ebi.ac.uk/pub/databases/spot/pgs/scores/PGS000034/ScoringFiles/PGS000034.txt.gz	PGS obtained from the Catalog should be cited appropriately, and used in accordance with any licensing restrictions set by the authors. See EBI Terms of Use (https://www.ebi.ac.uk/about/terms-of-use/) for additional details.
PGS000035	PRS_AF	Atrial fibrillation	atrial fibrillation	EFO_0000275	Pruning + Thresholding	P < 10^-4; r2 < 0.5	hg19	1168	0	NR	PGP000022	29129827	10.1161/CIRCULATIONAHA.117.031431	TRUE	European:89.9|African:4.4|East Asian:3.1|Hispanic or Latin American:2.5	European:100	Multi-ancestry (including European):100	https://ftp.ebi.ac.uk/pub/databases/spot/pgs/scores/PGS000035/ScoringFiles/PGS000035.txt.gz	PGS obtained from the Catalog should be cited appropriately, and used in accordance with any licensing restrictions set by the authors. See EBI Terms of Use (https://www.ebi.ac.uk/about/terms-of-use/) for additional details.
PGS000036	gePS_T2D	Type 2 diabetes	type 2 diabetes mellitus	MONDO_0005148	Pruning + Thresholding	P < 0.1; r2 < 0.6	GRCh37	171249	0	NR	PGP000023	30297969	10.1038/s41588-018-0241-6	TRUE	Multi-ancestry (including European):100	European:100	European:100	https://ftp.ebi.ac.uk/pub/databases/spot/pgs/scores/PGS000036/ScoringFiles/PGS000036.txt.gz	PGS obtained from the Catalog should be cited appropriately, and used in accordance with any licensing restrictions set by the authors. See EBI Terms of Use (https://www.ebi.ac.uk/about/terms-of-use/) for additional details.
PGS000037	PGS_AST	Asthma	asthma	MONDO_0004979	Pruning and Thresholding (P+T)	p < 5×10^-8 from meta-analysis in Moffatt 2010; R2 threshold 0.60	NR	15	0	NR	PGP000025	24429243	10.1016/S2213-2600(13)70101-2	TRUE	Multi-ancestry (including European):100		European:100	https://ftp.ebi.ac.uk/pub/databases/spot/pgs/scores/PGS000037/ScoringFiles/PGS000037.txt.gz	PGS obtained from the Catalog should be cited appropriately, and used in accordance with any licensing restrictions set by the authors. See EBI Terms of Use (https://www.ebi.ac.uk/about/terms-of-use/) for additional details.
PGS000038	PRS90	Stroke	stroke	EFO_0000712	Clumping + Thresholding	P < 1×10−5; Independent SNPs were clumped based selected using the following thresholds: r2 < 0.05 or 1000 Kb apart using plink	NR	90	0	NR	PGP000026	30355576	10.1136/bmj.k4168	TRUE	European:100		European:100	https://ftp.ebi.ac.uk/pub/databases/spot/pgs/scores/PGS000038/ScoringFiles/PGS000038.txt.gz	PGS obtained from the Catalog should be cited appropriately, and used in accordance with any licensing restrictions set by the authors. See EBI Terms of Use (https://www.ebi.ac.uk/about/terms-of-use/) for additional details.
PGS000039	metaGRS_ischaemicstroke	Ischaemic stroke	stroke|Ischemic stroke	EFO_0000712|HP_0002140	metaGRS of 19 component PGSs	LD thinning of 19 component PGSs	hg19	3225583	0	NR	PGP000027	31862893	10.1038/s41467-019-13848-1	TRUE	European:96.8|East Asian:1.3|South Asian:1|African:0.6|Hispanic or Latin American:0.2|Greater Middle Eastern:0.07|Additional Asian Ancestries:0.01	European:100	European:100	https://ftp.ebi.ac.uk/pub/databases/spot/pgs/scores/PGS000039/ScoringFiles/PGS000039.txt.gz	PGS obtained from the Catalog should be cited appropriately, and used in accordance with any licensing restrictions set by the authors. See EBI Terms of Use (https://www.ebi.ac.uk/about/terms-of-use/) for additional details.
PGS000040	GRS_CeD	Coeliac disease	celiac disease	EFO_0001060	SparSNP	Lasso penalised linear SVM, 10-fold cross-validation	hg18	228	0	NR	PGP000028	24550740	10.1371/journal.pgen.1004137	TRUE		European:100	European:100	https://ftp.ebi.ac.uk/pub/databases/spot/pgs/scores/PGS000040/ScoringFiles/PGS000040.txt.gz	PGS obtained from the Catalog should be cited appropriately, and used in accordance with any licensing restrictions set by the authors. See EBI Terms of Use (https://www.ebi.ac.uk/about/terms-of-use/) for additional details.
PGS000041	GRS-DQ2.5-CeD	Coeliac disease	celiac disease	EFO_0001060	SparSNP	Lasso penalised linear SVM on SNPs, 10-fold cross-validation	hg18	2513	0	NR	PGP000029	26244058	10.1186/s13073-015-0196-5	TRUE		European:100	European:100	https://ftp.ebi.ac.uk/pub/databases/spot/pgs/scores/PGS000041/ScoringFiles/PGS000041.txt.gz	PGS obtained from the Catalog should be cited appropriately, and used in accordance with any licensing restrictions set by the authors. See EBI Terms of Use (https://www.ebi.ac.uk/about/terms-of-use/) for additional details.
PGS000042	GRS-DQ2.5-CeD-imputed	Coeliac disease	celiac disease	EFO_0001060	SparSNP	Lasso penalised linear SVM on SNPs & imputed HLA alleles (SNP2HLA), 10-fold cross-validation	hg18	3317	0	NR	PGP000029	26244058	10.1186/s13073-015-0196-5	TRUE		European:100	European:100	https://ftp.ebi.ac.uk/pub/databases/spot/pgs/scores/PGS000042/ScoringFiles/PGS000042.txt.gz	PGS obtained from the Catalog should be cited appropriately, and used in accordance with any licensing restrictions set by the authors. See EBI Terms of Use (https://www.ebi.ac.uk/about/terms-of-use/) for additional details.
PGS000043	PRS_VTE	Venous thromboembolism	venous thromboembolism	EFO_0004286	Pruning + Clumping	P < 1×10^−5; R^2 > 0.2	GRCh37	297	0	NR	PGP000030	31676865	10.1038/s41588-019-0519-3	TRUE	European:88.7|African:7.9|Hispanic or Latin American:3.4		European:100	https://ftp.ebi.ac.uk/pub/databases/spot/pgs/scores/PGS000043/ScoringFiles/PGS000043.txt.gz	PGS obtained from the Catalog should be cited appropriately, and used in accordance with any licensing restrictions set by the authors. See EBI Terms of Use (https://www.ebi.ac.uk/about/terms-of-use/) for additional details.
PGS000044	PrCa66	Prostate cancer	prostate carcinoma	EFO_0001663	Known susceptibility loci (genome-wide significant SNPs)	P-value < 5E-8, top SNP	GRCh38	66	0	NR	PGP000031	26291059	10.1038/bjc.2015.289	TRUE	European:95.2|East Asian:4.8		European:100	https://ftp.ebi.ac.uk/pub/databases/spot/pgs/scores/PGS000044/ScoringFiles/PGS000044.txt.gz	PGS obtained from the Catalog should be cited appropriately, and used in accordance with any licensing restrictions set by the authors. See EBI Terms of Use (https://www.ebi.ac.uk/about/terms-of-use/) for additional details.
PGS000045	BCPRS_Overall	Breast cancer	breast carcinoma	EFO_0000305	Known susceptibility loci (genome-wide significant SNPs)	p<5x10-8, included indpendent SNPs from fine-mapping studies (p < 10-4)	GRCh37	88	0	NR	PGP000033	28376175	10.1093/jnci/djw302	TRUE	European:100		European:100	https://ftp.ebi.ac.uk/pub/databases/spot/pgs/scores/PGS000045/ScoringFiles/PGS000045.txt.gz	PGS obtained from the Catalog should be cited appropriately, and used in accordance with any licensing restrictions set by the authors. See EBI Terms of Use (https://www.ebi.ac.uk/about/terms-of-use/) for additional details.
PGS000046	BCPRS_ER+	Estrogen receptor [ER]-positive breast cancer	estrogen-receptor positive breast cancer	EFO_1000649	Known susceptibility loci (genome-wide significant SNPs)	p<5x10-8, included indpendent SNPs from fine-mapping studies (p < 10-4)	GRCh37	87	0	NR	PGP000033	28376175	10.1093/jnci/djw302	TRUE	European:100		European:100	https://ftp.ebi.ac.uk/pub/databases/spot/pgs/scores/PGS000046/ScoringFiles/PGS000046.txt.gz	PGS obtained from the Catalog should be cited appropriately, and used in accordance with any licensing restrictions set by the authors. See EBI Terms of Use (https://www.ebi.ac.uk/about/terms-of-use/) for additional details.
PGS000047	BCPRS_ER-	Estrogen receptor [ER]-negative breast cancer	estrogen-receptor negative breast cancer	EFO_1000650	Known susceptibility loci (genome-wide significant SNPs)	p<5x10-8, included indpendent SNPs from fine-mapping studies (p < 10-4)	GRCh37	53	0	NR	PGP000033	28376175	10.1093/jnci/djw302	TRUE	European:100		European:100	https://ftp.ebi.ac.uk/pub/databases/spot/pgs/scores/PGS000047/ScoringFiles/PGS000047.txt.gz	PGS obtained from the Catalog should be cited appropriately, and used in accordance with any licensing restrictions set by the authors. See EBI Terms of Use (https://www.ebi.ac.uk/about/terms-of-use/) for additional details.
PGS000048	OCPRS_Overall	Ovarian cancer	ovarian carcinoma	EFO_0001075	Known susceptibility loci (genome-wide significant SNPs)	Most strongly associated variant from each asociated region (p<5x10-8)	GRCh37	17	0	NR	PGP000033	28376175	10.1093/jnci/djw302	TRUE	European:100		European:100	https://ftp.ebi.ac.uk/pub/databases/spot/pgs/scores/PGS000048/ScoringFiles/PGS000048.txt.gz	PGS obtained from the Catalog should be cited appropriately, and used in accordance with any licensing restrictions set by the authors. See EBI Terms of Use (https://www.ebi.ac.uk/about/terms-of-use/) for additional details.
PGS000049	PRS103_PrCa	Prostate Cancer	prostate carcinoma	EFO_0001663	Known susceptibility loci (genome-wide significant SNPs)	Sum of log(ORs)	GRCh37	103	0	log(OR)	PGP000034	28448241	10.1200/JCO.2016.69.4935	TRUE	European:77.6|African:12|East Asian:8|Hispanic or Latin American:2.4		European:100	https://ftp.ebi.ac.uk/pub/databases/spot/pgs/scores/PGS000049/ScoringFiles/PGS000049.txt.gz	PGS obtained from the Catalog should be cited appropriately, and used in accordance with any licensing restrictions set by the authors. See EBI Terms of Use (https://www.ebi.ac.uk/about/terms-of-use/) for additional details.
PGS000050	PRS44	Breast cancer	breast carcinoma	EFO_0000305	Genome-wide significant SNPs	SNPs confirmed to be associated with breast cancer risk in Asian women (p-value < 0.05)	hg19	44	0	NR	PGP000035	27931260	10.1186/s13058-016-0786-1	TRUE	East Asian:100		East Asian:100	https://ftp.ebi.ac.uk/pub/databases/spot/pgs/scores/PGS000050/ScoringFiles/PGS000050.txt.gz	PGS obtained from the Catalog should be cited appropriately, and used in accordance with any licensing restrictions set by the authors. See EBI Terms of Use (https://www.ebi.ac.uk/about/terms-of-use/) for additional details.
PGS000051	PRS67	Breast Cancer	breast carcinoma	EFO_0000305	Hard thresholding	41 SNPs were identified with P<5xE-08 and additional 26 SNPs were further identified through familiar risk fitted disctribution of z scores in those SNPs that did not have associations reaching genome-wide levels of significance [ refer to Overall contribution to breast cancer susceptibility section of reference 8, Michailidou et al 2014]	NR	67	0	NR	PGP000036	30180161	10.1371/journal.pmed.1002644	TRUE	European:100		Multi-ancestry (including European):100	https://ftp.ebi.ac.uk/pub/databases/spot/pgs/scores/PGS000051/ScoringFiles/PGS000051.txt.gz	PGS obtained from the Catalog should be cited appropriately, and used in accordance with any licensing restrictions set by the authors. See EBI Terms of Use (https://www.ebi.ac.uk/about/terms-of-use/) for additional details.
PGS000052	sPRS161	Breast cancer	breast carcinoma	EFO_0000305	Genome-wide significant SNPs	p<5x10−8	GRCh37	161	0	NR	PGP000037	31186341	10.1136/jmedgenet-2019-106072	TRUE	European:100	European:100	European:100	https://ftp.ebi.ac.uk/pub/databases/spot/pgs/scores/PGS000052/ScoringFiles/PGS000052.txt.gz	PGS obtained from the Catalog should be cited appropriately, and used in accordance with any licensing restrictions set by the authors. See EBI Terms of Use (https://www.ebi.ac.uk/about/terms-of-use/) for additional details.
PGS000053	ALZ21_NIA-LOAD	Alzheimer's disease (late onset)	late-onset Alzheimers disease	EFO_1001870	Genome-wide significant SNPs	P<5x10e-8 in discovery samples	GRCh37	21	0	NR	PGP000039	28213371	10.1212/WNL.0000000000003734	TRUE	European:100		European:100	https://ftp.ebi.ac.uk/pub/databases/spot/pgs/scores/PGS000053/ScoringFiles/PGS000053.txt.gz	PGS obtained from the Catalog should be cited appropriately, and used in accordance with any licensing restrictions set by the authors. See EBI Terms of Use (https://www.ebi.ac.uk/about/terms-of-use/) for additional details.
PGS000054	ALZ21_EFIGA	Alzheimer's disease (late onset)	late-onset Alzheimers disease	EFO_1001870	Genome-wide significant SNPs	P<5x10e-8 in discovery samples	GRCh37	21	0	NR	PGP000039	28213371	10.1212/WNL.0000000000003734	TRUE	European:100		Hispanic or Latin American:100	https://ftp.ebi.ac.uk/pub/databases/spot/pgs/scores/PGS000054/ScoringFiles/PGS000054.txt.gz	PGS obtained from the Catalog should be cited appropriately, and used in accordance with any licensing restrictions set by the authors. See EBI Terms of Use (https://www.ebi.ac.uk/about/terms-of-use/) for additional details.
PGS000055	PRS_CRC	Colorectal cancer	colorectal cancer	EFO_0005842	Known susceptibility variants (genome-wide significant SNPs)	Replicated p-values (discovery p-value < 5e-8, replication p-value < 0.05)	hg19	76	0	NR	PGP000040	29917119	10.1093/jnci/djy099	TRUE	European:91.1|African:8.9		East Asian:50|European:50	https://ftp.ebi.ac.uk/pub/databases/spot/pgs/scores/PGS000055/ScoringFiles/PGS000055.txt.gz	PGS obtained from the Catalog should be cited appropriately, and used in accordance with any licensing restrictions set by the authors. See EBI Terms of Use (https://www.ebi.ac.uk/about/terms-of-use/) for additional details.
PGS000056	PD_PRS	Parkinson Disease	Parkinson disease	MONDO_0005180	Genome-wide significant SNPs		hg38	23	0	NR	PGP000041	29340614	10.1001/jamaneurol.2017.4206	TRUE	European:100		European:100	https://ftp.ebi.ac.uk/pub/databases/spot/pgs/scores/PGS000056/ScoringFiles/PGS000056.txt.gz	PGS obtained from the Catalog should be cited appropriately, and used in accordance with any licensing restrictions set by the authors. See EBI Terms of Use (https://www.ebi.ac.uk/about/terms-of-use/) for additional details.
PGS000057	CHD57	Coronary heart disease	coronary artery disease	EFO_0001645	Hard thresholding	Independent variants associated with CHD, with suitable proxies (r2 > 0.8) in the cohorts	hg19	57	0	NR	PGP000042	28223407	10.1161/CIRCULATIONAHA.116.024436	TRUE	European:52.1|Multi-ancestry (including European):38.7|South Asian:5.1|East Asian:2.3|Hispanic or Latin American:0.8|African:0.6|Greater Middle Eastern:0.5		Not Reported:100	https://ftp.ebi.ac.uk/pub/databases/spot/pgs/scores/PGS000057/ScoringFiles/PGS000057.txt.gz	PGS obtained from the Catalog should be cited appropriately, and used in accordance with any licensing restrictions set by the authors. See EBI Terms of Use (https://www.ebi.ac.uk/about/terms-of-use/) for additional details.
PGS000058	CAD_GRS_204	Coronary artery disease	coronary artery disease	EFO_0001645	Genome-wide significant SNPs	Variants with a genome-wide significant associations with CAD in GWAS and exome-wide association studies published as of December 2017	hg19	204	0	NR	PGP000043	30262460	10.2337/dc18-0709	TRUE	European:41.1|Multi-ancestry (including European):34.6|Not Reported:20.1|South Asian:2.7|East Asian:0.8|Hispanic or Latin American:0.3|African:0.2|Greater Middle Eastern:0.2		European:100	https://ftp.ebi.ac.uk/pub/databases/spot/pgs/scores/PGS000058/ScoringFiles/PGS000058.txt.gz	PGS obtained from the Catalog should be cited appropriately, and used in accordance with any licensing restrictions set by the authors. See EBI Terms of Use (https://www.ebi.ac.uk/about/terms-of-use/) for additional details.
PGS000059	CHD46	Coronary heart disease	coronary artery disease	EFO_0001645	Literature-derived SNP selection		NR	46	0	NR	PGP000044	30354305	10.1161/CIRCGEN.118.002324	TRUE	European:51.4|Multi-ancestry (including European):36|South Asian:7.5|East Asian:3.4|Hispanic or Latin American:0.8|African:0.6|Greater Middle Eastern:0.4		European:100	https://ftp.ebi.ac.uk/pub/databases/spot/pgs/scores/PGS000059/ScoringFiles/PGS000059.txt.gz	PGS obtained from the Catalog should be cited appropriately, and used in accordance with any licensing restrictions set by the authors. See EBI Terms of Use (https://www.ebi.ac.uk/about/terms-of-use/) for additional details.
PGS000060	GRS_HDL	high-density lipoprotein (HDL) cholesterol	high density lipoprotein cholesterol measurement	EFO_0004612	Genome-wide significant SNPs	p < 5e-8	NR	46	0	beta	PGP000045	25951326	10.1371/journal.pone.0126361	TRUE	European:100		African:25|Hispanic or Latin American:25|East Asian:25|European:25	https://ftp.ebi.ac.uk/pub/databases/spot/pgs/scores/PGS000060/ScoringFiles/PGS000060.txt.gz	PGS obtained from the Catalog should be cited appropriately, and used in accordance with any licensing restrictions set by the authors. See EBI Terms of Use (https://www.ebi.ac.uk/about/terms-of-use/) for additional details.
PGS000061	GRS_LDL	low-density lipoprotein (LDL) cholesterol	low density lipoprotein cholesterol measurement	EFO_0004611	Genome-wide significant SNPs	p < 5e-8	NR	37	0	beta	PGP000045	25951326	10.1371/journal.pone.0126361	TRUE	European:100		African:25|Hispanic or Latin American:25|East Asian:25|European:25	https://ftp.ebi.ac.uk/pub/databases/spot/pgs/scores/PGS000061/ScoringFiles/PGS000061.txt.gz	PGS obtained from the Catalog should be cited appropriately, and used in accordance with any licensing restrictions set by the authors. See EBI Terms of Use (https://www.ebi.ac.uk/about/terms-of-use/) for additional details.
PGS000062	GRS_TC	total cholesterol	total cholesterol measurement	EFO_0004574	Genome-wide significant SNPs	p < 5e-8	NR	52	0	beta	PGP000045	25951326	10.1371/journal.pone.0126361	TRUE	European:100		African:25|Hispanic or Latin American:25|East Asian:25|European:25	https://ftp.ebi.ac.uk/pub/databases/spot/pgs/scores/PGS000062/ScoringFiles/PGS000062.txt.gz	PGS obtained from the Catalog should be cited appropriately, and used in accordance with any licensing restrictions set by the authors. See EBI Terms of Use (https://www.ebi.ac.uk/about/terms-of-use/) for additional details.
PGS000063	GRS_TG	triglycerides	triglyceride measurement	EFO_0004530	Genome-wide significant SNPs	p < 5e-8	NR	32	0	beta	PGP000045	25951326	10.1371/journal.pone.0126361	TRUE	European:100		African:25|Hispanic or Latin American:25|East Asian:25|European:25	https://ftp.ebi.ac.uk/pub/databases/spot/pgs/scores/PGS000063/ScoringFiles/PGS000063.txt.gz	PGS obtained from the Catalog should be cited appropriately, and used in accordance with any licensing restrictions set by the authors. See EBI Terms of Use (https://www.ebi.ac.uk/about/terms-of-use/) for additional details.
PGS000064	GLGC2017_HDL	High density lipoprotein (HDL) cholesterol	high density lipoprotein cholesterol measurement	EFO_0004612	Established Lipid Loci; independent genome-wide significant variants	MAF < 0.01, Imputation r2 < 0.8, clumping based on r2 > 0.1, overlap of SNPs between study cohorts	hg19	120	0	NR	PGP000046	31551420	10.1038/s41467-019-12026-7	TRUE	European:81.6|South Asian:9.2|African:5.1|East Asian:2.5|Hispanic or Latin American:1.5		European:60|African:20|East Asian:20	https://ftp.ebi.ac.uk/pub/databases/spot/pgs/scores/PGS000064/ScoringFiles/PGS000064.txt.gz	PGS obtained from the Catalog should be cited appropriately, and used in accordance with any licensing restrictions set by the authors. See EBI Terms of Use (https://www.ebi.ac.uk/about/terms-of-use/) for additional details.
PGS000065	GLGC2017_LDL	Low density lipoprotein (LDL) cholesterol	low density lipoprotein cholesterol measurement	EFO_0004611	Established Lipid Loci; independent genome-wide significant variants	MAF < 0.01, Imputation r2 < 0.8, clumping based on r2 > 0.1, overlap of SNPs between study cohorts	hg19	103	0	NR	PGP000046	31551420	10.1038/s41467-019-12026-7	TRUE	European:81.6|South Asian:9.2|African:5.1|East Asian:2.5|Hispanic or Latin American:1.5		European:60|African:20|East Asian:20	https://ftp.ebi.ac.uk/pub/databases/spot/pgs/scores/PGS000065/ScoringFiles/PGS000065.txt.gz	PGS obtained from the Catalog should be cited appropriately, and used in accordance with any licensing restrictions set by the authors. See EBI Terms of Use (https://www.ebi.ac.uk/about/terms-of-use/) for additional details.
PGS000066	GLGC2017_TG	Triglycerides (TG)	triglyceride measurement	EFO_0004530	Established Lipid Loci; independent genome-wide significant variants	MAF < 0.01, Imputation r2 < 0.8, clumping based on r2 > 0.1, overlap of SNPs between study cohorts	hg19	101	0	NR	PGP000046	31551420	10.1038/s41467-019-12026-7	TRUE	European:81.6|South Asian:9.2|African:5.1|East Asian:2.5|Hispanic or Latin American:1.5		European:60|African:20|East Asian:20	https://ftp.ebi.ac.uk/pub/databases/spot/pgs/scores/PGS000066/ScoringFiles/PGS000066.txt.gz	PGS obtained from the Catalog should be cited appropriately, and used in accordance with any licensing restrictions set by the authors. See EBI Terms of Use (https://www.ebi.ac.uk/about/terms-of-use/) for additional details.
PGS000067	PCa_PHS	Prostate cancer	prostate carcinoma	EFO_0001663	Polygenic Hazard Score	Trend test p-value < 1e-6; selection of SNPs by logistic regresssion; SNP weights determined by Cox proportional hazards regression	GRCh37	54	0	beta_Cox	PGP000047	29321194	10.1136/bmj.j5757	TRUE		European:100	European:50|African:20|Multi-ancestry (including European):20|Additional Asian Ancestries:10	https://ftp.ebi.ac.uk/pub/databases/spot/pgs/scores/PGS000067/ScoringFiles/PGS000067.txt.gz	PGS obtained from the Catalog should be cited appropriately, and used in accordance with any licensing restrictions set by the authors. See EBI Terms of Use (https://www.ebi.ac.uk/about/terms-of-use/) for additional details.
PGS000068	PRS_EOC	Epithelial ovarian cancer	ovarian carcinoma	EFO_0001075	Genomewide-significant SNPs	P < 5x10-8 in GWAS for any type of EOC	GRCh37	15	0	logOR	PGP000048	29730597	10.1136/jmedgenet-2018-105313	TRUE	European:100		European:100	https://ftp.ebi.ac.uk/pub/databases/spot/pgs/scores/PGS000068/ScoringFiles/PGS000068.txt.gz	PGS obtained from the Catalog should be cited appropriately, and used in accordance with any licensing restrictions set by the authors. See EBI Terms of Use (https://www.ebi.ac.uk/about/terms-of-use/) for additional details.
PGS000069	PRS_sEOC	Serous epithelial ovarian cancer	ovarian serous carcinoma	EFO_1001516	Genomewide-significant SNPs	P < 5x10-8 in GWAS for any type of EOC	GRCh37	15	0	logOR	PGP000048	29730597	10.1136/jmedgenet-2018-105313	TRUE	European:100		European:100	https://ftp.ebi.ac.uk/pub/databases/spot/pgs/scores/PGS000069/ScoringFiles/PGS000069.txt.gz	PGS obtained from the Catalog should be cited appropriately, and used in accordance with any licensing restrictions set by the authors. See EBI Terms of Use (https://www.ebi.ac.uk/about/terms-of-use/) for additional details.
PGS000070	PRS_LC_C	Lung cancer	lung adenocarcinoma	EFO_0000571	Genomewide-significant SNPs, filtered to be specific to Chinese ancestry individuals	Meta-anlaysis p-value ≤5·0 × 10−8; MAF < 0.01 (in Chinese populations); r2 >= 0.1; Chinese-specific association p-value < 0.00125	GRCh37	19	0	ln(OR)	PGP000049	31326317	10.1016/S2213-2600(19)30144-4	TRUE	European:51.1|East Asian:48.9		East Asian:100	https://ftp.ebi.ac.uk/pub/databases/spot/pgs/scores/PGS000070/ScoringFiles/PGS000070.txt.gz	PGS obtained from the Catalog should be cited appropriately, and used in accordance with any licensing restrictions set by the authors. See EBI Terms of Use (https://www.ebi.ac.uk/about/terms-of-use/) for additional details.
PGS000071	CC_Bladder	Bladder cancer	urinary bladder carcinoma	MONDO_0004986	Genome-wide significant SNPs	P < 5e-8, MAF > 1%, biallelic SNPs, LD-thin r2 > 0.3	GRCh37	15	0	NR	PGP000050	33579919	10.1038/s41467-021-21288-z	TRUE	European:100		European:100	https://ftp.ebi.ac.uk/pub/databases/spot/pgs/scores/PGS000071/ScoringFiles/PGS000071.txt.gz	PGS obtained from the Catalog should be cited appropriately, and used in accordance with any licensing restrictions set by the authors. See EBI Terms of Use (https://www.ebi.ac.uk/about/terms-of-use/) for additional details.
PGS000072	CC_Breast	Breast cancer	breast carcinoma	EFO_0000305	Genome-wide significant SNPs	P < 5e-8, MAF > 1%, biallelic SNPs, LD-thin r2 > 0.3	GRCh37	187	0	log(OR)	PGP000050	33579919	10.1038/s41467-021-21288-z	TRUE	European:98.1|East Asian:1|African:0.9		European:100	https://ftp.ebi.ac.uk/pub/databases/spot/pgs/scores/PGS000072/ScoringFiles/PGS000072.txt.gz	PGS obtained from the Catalog should be cited appropriately, and used in accordance with any licensing restrictions set by the authors. See EBI Terms of Use (https://www.ebi.ac.uk/about/terms-of-use/) for additional details.
PGS000073	CC_Cervix	Cervical cancer	cervical carcinoma	EFO_0001061	Genome-wide significant SNPs	P < 5e-8, MAF > 1%, biallelic SNPs, LD-thin r2 > 0.3	GRCh37	10	0	log(OR)	PGP000050	33579919	10.1038/s41467-021-21288-z	TRUE	European:100		European:100	https://ftp.ebi.ac.uk/pub/databases/spot/pgs/scores/PGS000073/ScoringFiles/PGS000073.txt.gz	PGS obtained from the Catalog should be cited appropriately, and used in accordance with any licensing restrictions set by the authors. See EBI Terms of Use (https://www.ebi.ac.uk/about/terms-of-use/) for additional details.
PGS000074	CC_Colorectal	Colorectal cancer	colorectal cancer	EFO_0005842	Genome-wide significant SNPs	P < 5e-8, MAF > 1%, biallelic SNPs, LD-thin r2 > 0.3	GRCh37	103	0	NR	PGP000050	33579919	10.1038/s41467-021-21288-z	TRUE	European:96.6|African:1.7|East Asian:1.4|Additional Diverse Ancestries:0.3		European:100	https://ftp.ebi.ac.uk/pub/databases/spot/pgs/scores/PGS000074/ScoringFiles/PGS000074.txt.gz	PGS obtained from the Catalog should be cited appropriately, and used in accordance with any licensing restrictions set by the authors. See EBI Terms of Use (https://www.ebi.ac.uk/about/terms-of-use/) for additional details.
PGS000075	CC_Endo	Endometrial cancer	endometrial carcinoma	EFO_1001512	Genome-wide significant SNPs	P < 5e-8, MAF > 1%, biallelic SNPs, LD-thin r2 > 0.3	GRCh37	9	0	NR	PGP000050	33579919	10.1038/s41467-021-21288-z	TRUE	European:66.4|Not Reported:33.6		European:100	https://ftp.ebi.ac.uk/pub/databases/spot/pgs/scores/PGS000075/ScoringFiles/PGS000075.txt.gz	PGS obtained from the Catalog should be cited appropriately, and used in accordance with any licensing restrictions set by the authors. See EBI Terms of Use (https://www.ebi.ac.uk/about/terms-of-use/) for additional details.
PGS000076	CC_Kidney	Kidney cancer	renal cell carcinoma	EFO_0000681	Genome-wide significant SNPs	P < 5e-8, MAF > 1%, biallelic SNPs, LD-thin r2 > 0.3	GRCh37	19	0	NR	PGP000050	33579919	10.1038/s41467-021-21288-z	TRUE	European:100		European:100	https://ftp.ebi.ac.uk/pub/databases/spot/pgs/scores/PGS000076/ScoringFiles/PGS000076.txt.gz	PGS obtained from the Catalog should be cited appropriately, and used in accordance with any licensing restrictions set by the authors. See EBI Terms of Use (https://www.ebi.ac.uk/about/terms-of-use/) for additional details.
PGS000077	CC_LL	Lymphocytic leukemia	lymphoid leukemia	EFO_0004289	Genome-wide significant SNPs	P < 5e-8, MAF > 1%, biallelic SNPs, LD-thin r2 > 0.3	GRCh37	75	0	NR	PGP000050	33579919	10.1038/s41467-021-21288-z	TRUE	European:84.3|Hispanic or Latin American:9|African:3.7|Multi-ancestry (excluding European):3		European:100	https://ftp.ebi.ac.uk/pub/databases/spot/pgs/scores/PGS000077/ScoringFiles/PGS000077.txt.gz	PGS obtained from the Catalog should be cited appropriately, and used in accordance with any licensing restrictions set by the authors. See EBI Terms of Use (https://www.ebi.ac.uk/about/terms-of-use/) for additional details.
PGS000078	CC_Lung	Lung cancer	lung carcinoma	EFO_0001071	Genome-wide significant SNPs	P < 5e-8, MAF > 1%, biallelic SNPs, LD-thin r2 > 0.3	GRCh37	109	0	NR	PGP000050	33579919	10.1038/s41467-021-21288-z	TRUE	European:100		European:100	https://ftp.ebi.ac.uk/pub/databases/spot/pgs/scores/PGS000078/ScoringFiles/PGS000078.txt.gz	PGS obtained from the Catalog should be cited appropriately, and used in accordance with any licensing restrictions set by the authors. See EBI Terms of Use (https://www.ebi.ac.uk/about/terms-of-use/) for additional details.
PGS000079	CC_Melanoma	Melanoma	melanoma	EFO_0000756	Genome-wide significant SNPs	P < 5e-8, MAF > 1%, biallelic SNPs, LD-thin r2 > 0.3	GRCh37	24	0	log(OR)	PGP000050	33579919	10.1038/s41467-021-21288-z	TRUE	European:100		European:100	https://ftp.ebi.ac.uk/pub/databases/spot/pgs/scores/PGS000079/ScoringFiles/PGS000079.txt.gz	PGS obtained from the Catalog should be cited appropriately, and used in accordance with any licensing restrictions set by the authors. See EBI Terms of Use (https://www.ebi.ac.uk/about/terms-of-use/) for additional details.
PGS000080	CC_NHL	Non-Hodgkin's lymphoma	non-Hodgkins lymphoma	EFO_0005952	Genome-wide significant SNPs	P < 5e-8, MAF > 1%, biallelic SNPs, LD-thin r2 > 0.3	GRCh37	19	0	log(OR)	PGP000050	33579919	10.1038/s41467-021-21288-z	TRUE	European:85.3|Not Reported:14.7		European:100	https://ftp.ebi.ac.uk/pub/databases/spot/pgs/scores/PGS000080/ScoringFiles/PGS000080.txt.gz	PGS obtained from the Catalog should be cited appropriately, and used in accordance with any licensing restrictions set by the authors. See EBI Terms of Use (https://www.ebi.ac.uk/about/terms-of-use/) for additional details.
PGS000081	CC_Oral	Oral cavity and pharyngeal cancers	oral cavity cancer|pharynx cancer	EFO_0005570|EFO_0005577	Genome-wide significant SNPs	P < 5e-8, MAF > 1%, biallelic SNPs, LD-thin r2 > 0.3	GRCh37	14	0	log(OR)	PGP000050	33579919	10.1038/s41467-021-21288-z	TRUE	European:95.6|Not Reported:4.4		European:100	https://ftp.ebi.ac.uk/pub/databases/spot/pgs/scores/PGS000081/ScoringFiles/PGS000081.txt.gz	PGS obtained from the Catalog should be cited appropriately, and used in accordance with any licensing restrictions set by the authors. See EBI Terms of Use (https://www.ebi.ac.uk/about/terms-of-use/) for additional details.
PGS000082	CC_Ovary	Ovarian cancer	ovarian carcinoma	EFO_0001075	Genome-wide significant SNPs	P < 5e-8, MAF > 1%, biallelic SNPs, LD-thin r2 > 0.3	GRCh37	36	0	log(OR)	PGP000050	33579919	10.1038/s41467-021-21288-z	TRUE	European:100		European:100	https://ftp.ebi.ac.uk/pub/databases/spot/pgs/scores/PGS000082/ScoringFiles/PGS000082.txt.gz	PGS obtained from the Catalog should be cited appropriately, and used in accordance with any licensing restrictions set by the authors. See EBI Terms of Use (https://www.ebi.ac.uk/about/terms-of-use/) for additional details.
PGS000083	CC_Pancreas	Pancreatic cancer	pancreatic carcinoma	EFO_0002618	Genome-wide significant SNPs	P < 5e-8, MAF > 1%, biallelic SNPs, LD-thin r2 > 0.3	GRCh37	22	0	NR	PGP000050	33579919	10.1038/s41467-021-21288-z	TRUE	European:86.6|Not Reported:12.3|Multi-ancestry (excluding European):1.1		European:100	https://ftp.ebi.ac.uk/pub/databases/spot/pgs/scores/PGS000083/ScoringFiles/PGS000083.txt.gz	PGS obtained from the Catalog should be cited appropriately, and used in accordance with any licensing restrictions set by the authors. See EBI Terms of Use (https://www.ebi.ac.uk/about/terms-of-use/) for additional details.
PGS000084	CC_Prostate	Prostate cancer	prostate carcinoma	EFO_0001663	Genome-wide significant SNPs	P < 5e-8, MAF > 1%, biallelic SNPs, LD-thin r2 > 0.3	GRCh37	161	0	log(OR)	PGP000050	33579919	10.1038/s41467-021-21288-z	TRUE	European:93.4|African:2.8|East Asian:2.5|Hispanic or Latin American:1.2|Not Reported:0.1		European:100	https://ftp.ebi.ac.uk/pub/databases/spot/pgs/scores/PGS000084/ScoringFiles/PGS000084.txt.gz	PGS obtained from the Catalog should be cited appropriately, and used in accordance with any licensing restrictions set by the authors. See EBI Terms of Use (https://www.ebi.ac.uk/about/terms-of-use/) for additional details.
PGS000086	CC_Testis	Testicular cancer	testicular carcinoma|Testicular Germ Cell Tumor	EFO_0005088|EFO_1000566	Genome-wide significant SNPs	P < 5e-8, MAF > 1%, biallelic SNPs, LD-thin r2 > 0.3	GRCh37	52	0	NR	PGP000050	33579919	10.1038/s41467-021-21288-z	TRUE	European:100		European:100	https://ftp.ebi.ac.uk/pub/databases/spot/pgs/scores/PGS000086/ScoringFiles/PGS000086.txt.gz	PGS obtained from the Catalog should be cited appropriately, and used in accordance with any licensing restrictions set by the authors. See EBI Terms of Use (https://www.ebi.ac.uk/about/terms-of-use/) for additional details.
PGS000087	CC_Thyroid	Thyroid cancer	thyroid carcinoma	EFO_0002892	Genome-wide significant SNPs	P < 5e-8, MAF > 1%, biallelic SNPs, LD-thin r2 > 0.3	GRCh37	12	0	log(OR)	PGP000050	33579919	10.1038/s41467-021-21288-z	TRUE	European:100		European:100	https://ftp.ebi.ac.uk/pub/databases/spot/pgs/scores/PGS000087/ScoringFiles/PGS000087.txt.gz	PGS obtained from the Catalog should be cited appropriately, and used in accordance with any licensing restrictions set by the authors. See EBI Terms of Use (https://www.ebi.ac.uk/about/terms-of-use/) for additional details.
PGS000088	baso	Basophil count	basophil count	EFO_0005090	Regularized Regression (Elastic Net)	Bi-allelic variants (MAF > 0.01, INFO > 0.4, missingness rate < 0.1) with LD thinning (r2 threshold = 0.5)	GRCh37	9121	0	beta	PGP000051	35072137	10.1016/j.xgen.2021.100086	TRUE	European:100	European:100	European:100	https://ftp.ebi.ac.uk/pub/databases/spot/pgs/scores/PGS000088/ScoringFiles/PGS000088.txt.gz	PGS obtained from the Catalog should be cited appropriately, and used in accordance with any licensing restrictions set by the authors. See EBI Terms of Use (https://www.ebi.ac.uk/about/terms-of-use/) for additional details.
PGS000089	baso_p	Basophil percentage of white cells	basophil percentage of leukocytes	EFO_0007992	Regularized Regression (Elastic Net)	Bi-allelic variants (MAF > 0.01, INFO > 0.4, missingness rate < 0.1) with LD thinning (r2 threshold = 0.5)	GRCh37	5248	0	beta	PGP000051	35072137	10.1016/j.xgen.2021.100086	TRUE	European:100	European:100	European:100	https://ftp.ebi.ac.uk/pub/databases/spot/pgs/scores/PGS000089/ScoringFiles/PGS000089.txt.gz	PGS obtained from the Catalog should be cited appropriately, and used in accordance with any licensing restrictions set by the authors. See EBI Terms of Use (https://www.ebi.ac.uk/about/terms-of-use/) for additional details.
PGS000090	eo	Eosinophil count	eosinophil count	EFO_0004842	Regularized Regression (Elastic Net)	Bi-allelic variants (MAF > 0.01, INFO > 0.4, missingness rate < 0.1) with LD thinning (r2 threshold = 0.5)	GRCh37	22949	0	beta	PGP000051	35072137	10.1016/j.xgen.2021.100086	TRUE	European:100	European:100	European:100	https://ftp.ebi.ac.uk/pub/databases/spot/pgs/scores/PGS000090/ScoringFiles/PGS000090.txt.gz	PGS obtained from the Catalog should be cited appropriately, and used in accordance with any licensing restrictions set by the authors. See EBI Terms of Use (https://www.ebi.ac.uk/about/terms-of-use/) for additional details.
PGS000091	eo_p	Eosinophil percentage of white cells	eosinophil percentage of leukocytes	EFO_0007991	Regularized Regression (Elastic Net)	Bi-allelic variants (MAF > 0.01, INFO > 0.4, missingness rate < 0.1) with LD thinning (r2 threshold = 0.5)	GRCh37	24406	0	beta	PGP000051	35072137	10.1016/j.xgen.2021.100086	TRUE	European:100	European:100	European:100	https://ftp.ebi.ac.uk/pub/databases/spot/pgs/scores/PGS000091/ScoringFiles/PGS000091.txt.gz	PGS obtained from the Catalog should be cited appropriately, and used in accordance with any licensing restrictions set by the authors. See EBI Terms of Use (https://www.ebi.ac.uk/about/terms-of-use/) for additional details.
PGS000092	hct	Hematocrit	hematocrit	EFO_0004348	Regularized Regression (Elastic Net)	Bi-allelic variants (MAF > 0.01, INFO > 0.4, missingness rate < 0.1) with LD thinning (r2 threshold = 0.5)	GRCh37	28214	0	beta	PGP000051	35072137	10.1016/j.xgen.2021.100086	TRUE	European:100	European:100	European:100	https://ftp.ebi.ac.uk/pub/databases/spot/pgs/scores/PGS000092/ScoringFiles/PGS000092.txt.gz	PGS obtained from the Catalog should be cited appropriately, and used in accordance with any licensing restrictions set by the authors. See EBI Terms of Use (https://www.ebi.ac.uk/about/terms-of-use/) for additional details.
PGS000093	hgb	Hemoglobin concentration	hemoglobin measurement	EFO_0004509	Regularized Regression (Elastic Net)	Bi-allelic variants (MAF > 0.01, INFO > 0.4, missingness rate < 0.1) with LD thinning (r2 threshold = 0.5)	GRCh37	25090	0	beta	PGP000051	35072137	10.1016/j.xgen.2021.100086	TRUE	European:100	European:100	European:100	https://ftp.ebi.ac.uk/pub/databases/spot/pgs/scores/PGS000093/ScoringFiles/PGS000093.txt.gz	PGS obtained from the Catalog should be cited appropriately, and used in accordance with any licensing restrictions set by the authors. See EBI Terms of Use (https://www.ebi.ac.uk/about/terms-of-use/) for additional details.
PGS000094	hlr	High light scatter reticulocyte count	reticulocyte count	EFO_0007986	Regularized Regression (Elastic Net)	Bi-allelic variants (MAF > 0.01, INFO > 0.4, missingness rate < 0.1) with LD thinning (r2 threshold = 0.5)	GRCh37	25493	0	beta	PGP000051	35072137	10.1016/j.xgen.2021.100086	TRUE	European:100	European:100	European:100	https://ftp.ebi.ac.uk/pub/databases/spot/pgs/scores/PGS000094/ScoringFiles/PGS000094.txt.gz	PGS obtained from the Catalog should be cited appropriately, and used in accordance with any licensing restrictions set by the authors. See EBI Terms of Use (https://www.ebi.ac.uk/about/terms-of-use/) for additional details.
PGS000095	hlr_p	High light scatter reticulocyte percentage of red cells	reticulocyte count	EFO_0007986	Regularized Regression (Elastic Net)	Bi-allelic variants (MAF > 0.01, INFO > 0.4, missingness rate < 0.1) with LD thinning (r2 threshold = 0.5)	GRCh37	21957	0	beta	PGP000051	35072137	10.1016/j.xgen.2021.100086	TRUE	European:100	European:100	European:100	https://ftp.ebi.ac.uk/pub/databases/spot/pgs/scores/PGS000095/ScoringFiles/PGS000095.txt.gz	PGS obtained from the Catalog should be cited appropriately, and used in accordance with any licensing restrictions set by the authors. See EBI Terms of Use (https://www.ebi.ac.uk/about/terms-of-use/) for additional details.
PGS000096	irf	Immature fraction of reticulocytes	reticulocyte count	EFO_0007986	Regularized Regression (Elastic Net)	Bi-allelic variants (MAF > 0.01, INFO > 0.4, missingness rate < 0.1) with LD thinning (r2 threshold = 0.5)	GRCh37	17850	0	beta	PGP000051	35072137	10.1016/j.xgen.2021.100086	TRUE	European:100	European:100	European:100	https://ftp.ebi.ac.uk/pub/databases/spot/pgs/scores/PGS000096/ScoringFiles/PGS000096.txt.gz	PGS obtained from the Catalog should be cited appropriately, and used in accordance with any licensing restrictions set by the authors. See EBI Terms of Use (https://www.ebi.ac.uk/about/terms-of-use/) for additional details.
PGS000097	lymph	Lymphocyte count	lymphocyte count	EFO_0004587	Regularized Regression (Elastic Net)	Bi-allelic variants (MAF > 0.01, INFO > 0.4, missingness rate < 0.1) with LD thinning (r2 threshold = 0.5)	GRCh37	24646	0	beta	PGP000051	35072137	10.1016/j.xgen.2021.100086	TRUE	European:100	European:100	European:100	https://ftp.ebi.ac.uk/pub/databases/spot/pgs/scores/PGS000097/ScoringFiles/PGS000097.txt.gz	PGS obtained from the Catalog should be cited appropriately, and used in accordance with any licensing restrictions set by the authors. See EBI Terms of Use (https://www.ebi.ac.uk/about/terms-of-use/) for additional details.
PGS000098	lymph_p	Lymphocyte percentage of white cells	lymphocyte percentage of leukocytes	EFO_0007993	Regularized Regression (Elastic Net)	Bi-allelic variants (MAF > 0.01, INFO > 0.4, missingness rate < 0.1) with LD thinning (r2 threshold = 0.5)	GRCh37	22363	0	beta	PGP000051	35072137	10.1016/j.xgen.2021.100086	TRUE	European:100	European:100	European:100	https://ftp.ebi.ac.uk/pub/databases/spot/pgs/scores/PGS000098/ScoringFiles/PGS000098.txt.gz	PGS obtained from the Catalog should be cited appropriately, and used in accordance with any licensing restrictions set by the authors. See EBI Terms of Use (https://www.ebi.ac.uk/about/terms-of-use/) for additional details.
PGS000099	mch	Mean corpuscular hemoglobin	mean corpuscular hemoglobin	EFO_0004527	Regularized Regression (Elastic Net)	Bi-allelic variants (MAF > 0.01, INFO > 0.4, missingness rate < 0.1) with LD thinning (r2 threshold = 0.5)	GRCh37	27081	0	beta	PGP000051	35072137	10.1016/j.xgen.2021.100086	TRUE	European:100	European:100	European:100	https://ftp.ebi.ac.uk/pub/databases/spot/pgs/scores/PGS000099/ScoringFiles/PGS000099.txt.gz	PGS obtained from the Catalog should be cited appropriately, and used in accordance with any licensing restrictions set by the authors. See EBI Terms of Use (https://www.ebi.ac.uk/about/terms-of-use/) for additional details.
PGS000100	mchc	Mean corpuscular hemoglobin concentration	mean corpuscular hemoglobin concentration	EFO_0004528	Regularized Regression (Elastic Net)	Bi-allelic variants (MAF > 0.01, INFO > 0.4, missingness rate < 0.1) with LD thinning (r2 threshold = 0.5)	GRCh37	11832	0	beta	PGP000051	35072137	10.1016/j.xgen.2021.100086	TRUE	European:100	European:100	European:100	https://ftp.ebi.ac.uk/pub/databases/spot/pgs/scores/PGS000100/ScoringFiles/PGS000100.txt.gz	PGS obtained from the Catalog should be cited appropriately, and used in accordance with any licensing restrictions set by the authors. See EBI Terms of Use (https://www.ebi.ac.uk/about/terms-of-use/) for additional details.
PGS000101	mcv	Mean corpuscular volume	mean corpuscular volume	EFO_0004526	Regularized Regression (Elastic Net)	Bi-allelic variants (MAF > 0.01, INFO > 0.4, missingness rate < 0.1) with LD thinning (r2 threshold = 0.5)	GRCh37	25001	0	beta	PGP000051	35072137	10.1016/j.xgen.2021.100086	TRUE	European:100	European:100	European:100	https://ftp.ebi.ac.uk/pub/databases/spot/pgs/scores/PGS000101/ScoringFiles/PGS000101.txt.gz	PGS obtained from the Catalog should be cited appropriately, and used in accordance with any licensing restrictions set by the authors. See EBI Terms of Use (https://www.ebi.ac.uk/about/terms-of-use/) for additional details.
PGS000102	mono	Monocyte count	monocyte count	EFO_0005091	Regularized Regression (Elastic Net)	Bi-allelic variants (MAF > 0.01, INFO > 0.4, missingness rate < 0.1) with LD thinning (r2 threshold = 0.5)	GRCh37	28162	0	beta	PGP000051	35072137	10.1016/j.xgen.2021.100086	TRUE	European:100	European:100	European:100	https://ftp.ebi.ac.uk/pub/databases/spot/pgs/scores/PGS000102/ScoringFiles/PGS000102.txt.gz	PGS obtained from the Catalog should be cited appropriately, and used in accordance with any licensing restrictions set by the authors. See EBI Terms of Use (https://www.ebi.ac.uk/about/terms-of-use/) for additional details.
PGS000103	mono_p	Monocyte percentage of white cells	monocyte percentage of leukocytes	EFO_0007989	Regularized Regression (Elastic Net)	Bi-allelic variants (MAF > 0.01, INFO > 0.4, missingness rate < 0.1) with LD thinning (r2 threshold = 0.5)	GRCh37	22843	0	beta	PGP000051	35072137	10.1016/j.xgen.2021.100086	TRUE	European:100	European:100	European:100	https://ftp.ebi.ac.uk/pub/databases/spot/pgs/scores/PGS000103/ScoringFiles/PGS000103.txt.gz	PGS obtained from the Catalog should be cited appropriately, and used in accordance with any licensing restrictions set by the authors. See EBI Terms of Use (https://www.ebi.ac.uk/about/terms-of-use/) for additional details.
PGS000104	mpv	Mean platelet volume	mean platelet volume	EFO_0004584	Regularized Regression (Elastic Net)	Bi-allelic variants (MAF > 0.01, INFO > 0.4, missingness rate < 0.1) with LD thinning (r2 threshold = 0.5)	GRCh37	25745	0	beta	PGP000051	35072137	10.1016/j.xgen.2021.100086	TRUE	European:100	European:100	European:100	https://ftp.ebi.ac.uk/pub/databases/spot/pgs/scores/PGS000104/ScoringFiles/PGS000104.txt.gz	PGS obtained from the Catalog should be cited appropriately, and used in accordance with any licensing restrictions set by the authors. See EBI Terms of Use (https://www.ebi.ac.uk/about/terms-of-use/) for additional details.
PGS000105	neut	Neutrophil count	neutrophil count	EFO_0004833	Regularized Regression (Elastic Net)	Bi-allelic variants (MAF > 0.01, INFO > 0.4, missingness rate < 0.1) with LD thinning (r2 threshold = 0.5)	GRCh37	23864	0	beta	PGP000051	35072137	10.1016/j.xgen.2021.100086	TRUE	European:100	European:100	European:100	https://ftp.ebi.ac.uk/pub/databases/spot/pgs/scores/PGS000105/ScoringFiles/PGS000105.txt.gz	PGS obtained from the Catalog should be cited appropriately, and used in accordance with any licensing restrictions set by the authors. See EBI Terms of Use (https://www.ebi.ac.uk/about/terms-of-use/) for additional details.
PGS000106	neut_p	Neutrophil percentage of white cells	neutrophil percentage of leukocytes	EFO_0007990	Regularized Regression (Elastic Net)	Bi-allelic variants (MAF > 0.01, INFO > 0.4, missingness rate < 0.1) with LD thinning (r2 threshold = 0.5)	GRCh37	22049	0	beta	PGP000051	35072137	10.1016/j.xgen.2021.100086	TRUE	European:100	European:100	European:100	https://ftp.ebi.ac.uk/pub/databases/spot/pgs/scores/PGS000106/ScoringFiles/PGS000106.txt.gz	PGS obtained from the Catalog should be cited appropriately, and used in accordance with any licensing restrictions set by the authors. See EBI Terms of Use (https://www.ebi.ac.uk/about/terms-of-use/) for additional details.
PGS000107	pct	Plateletcrit	platelet crit	EFO_0007985	Regularized Regression (Elastic Net)	Bi-allelic variants (MAF > 0.01, INFO > 0.4, missingness rate < 0.1) with LD thinning (r2 threshold = 0.5)	GRCh37	30459	0	beta	PGP000051	35072137	10.1016/j.xgen.2021.100086	TRUE	European:100	European:100	European:100	https://ftp.ebi.ac.uk/pub/databases/spot/pgs/scores/PGS000107/ScoringFiles/PGS000107.txt.gz	PGS obtained from the Catalog should be cited appropriately, and used in accordance with any licensing restrictions set by the authors. See EBI Terms of Use (https://www.ebi.ac.uk/about/terms-of-use/) for additional details.
PGS000108	pdw	Platelet distribution width	platelet component distribution width	EFO_0007984	Regularized Regression (Elastic Net)	Bi-allelic variants (MAF > 0.01, INFO > 0.4, missingness rate < 0.1) with LD thinning (r2 threshold = 0.5)	GRCh37	25995	0	beta	PGP000051	35072137	10.1016/j.xgen.2021.100086	TRUE	European:100	European:100	European:100	https://ftp.ebi.ac.uk/pub/databases/spot/pgs/scores/PGS000108/ScoringFiles/PGS000108.txt.gz	PGS obtained from the Catalog should be cited appropriately, and used in accordance with any licensing restrictions set by the authors. See EBI Terms of Use (https://www.ebi.ac.uk/about/terms-of-use/) for additional details.
PGS000109	plt	Platelet count	platelet count	EFO_0004309	Regularized Regression (Elastic Net)	Bi-allelic variants (MAF > 0.01, INFO > 0.4, missingness rate < 0.1) with LD thinning (r2 threshold = 0.5)	GRCh37	26683	0	beta	PGP000051	35072137	10.1016/j.xgen.2021.100086	TRUE	European:100	European:100	European:100	https://ftp.ebi.ac.uk/pub/databases/spot/pgs/scores/PGS000109/ScoringFiles/PGS000109.txt.gz	PGS obtained from the Catalog should be cited appropriately, and used in accordance with any licensing restrictions set by the authors. See EBI Terms of Use (https://www.ebi.ac.uk/about/terms-of-use/) for additional details.
PGS000110	rbc	Red blood cell count	erythrocyte count	EFO_0004305	Regularized Regression (Elastic Net)	Bi-allelic variants (MAF > 0.01, INFO > 0.4, missingness rate < 0.1) with LD thinning (r2 threshold = 0.5)	GRCh37	23242	0	beta	PGP000051	35072137	10.1016/j.xgen.2021.100086	TRUE	European:100	European:100	European:100	https://ftp.ebi.ac.uk/pub/databases/spot/pgs/scores/PGS000110/ScoringFiles/PGS000110.txt.gz	PGS obtained from the Catalog should be cited appropriately, and used in accordance with any licensing restrictions set by the authors. See EBI Terms of Use (https://www.ebi.ac.uk/about/terms-of-use/) for additional details.
PGS000111	ret	Reticulocyte count	reticulocyte count	EFO_0007986	Regularized Regression (Elastic Net)	Bi-allelic variants (MAF > 0.01, INFO > 0.4, missingness rate < 0.1) with LD thinning (r2 threshold = 0.5)	GRCh37	26077	0	beta	PGP000051	35072137	10.1016/j.xgen.2021.100086	TRUE	European:100	European:100	European:100	https://ftp.ebi.ac.uk/pub/databases/spot/pgs/scores/PGS000111/ScoringFiles/PGS000111.txt.gz	PGS obtained from the Catalog should be cited appropriately, and used in accordance with any licensing restrictions set by the authors. See EBI Terms of Use (https://www.ebi.ac.uk/about/terms-of-use/) for additional details.
PGS000112	ret_p	Reticulocyte fraction of red cells	reticulocyte count	EFO_0007986	Regularized Regression (Elastic Net)	Bi-allelic variants (MAF > 0.01, INFO > 0.4, missingness rate < 0.1) with LD thinning (r2 threshold = 0.5)	GRCh37	25939	0	beta	PGP000051	35072137	10.1016/j.xgen.2021.100086	TRUE	European:100	European:100	European:100	https://ftp.ebi.ac.uk/pub/databases/spot/pgs/scores/PGS000112/ScoringFiles/PGS000112.txt.gz	PGS obtained from the Catalog should be cited appropriately, and used in accordance with any licensing restrictions set by the authors. See EBI Terms of Use (https://www.ebi.ac.uk/about/terms-of-use/) for additional details.
PGS000113	wbc	White blood cell count	leukocyte count	EFO_0004308	Regularized Regression (Elastic Net)	Bi-allelic variants (MAF > 0.01, INFO > 0.4, missingness rate < 0.1) with LD thinning (r2 threshold = 0.5)	GRCh37	28383	0	beta	PGP000051	35072137	10.1016/j.xgen.2021.100086	TRUE	European:100	European:100	European:100	https://ftp.ebi.ac.uk/pub/databases/spot/pgs/scores/PGS000113/ScoringFiles/PGS000113.txt.gz	PGS obtained from the Catalog should be cited appropriately, and used in accordance with any licensing restrictions set by the authors. See EBI Terms of Use (https://www.ebi.ac.uk/about/terms-of-use/) for additional details.
PGS000114	GRS-JIA-20	Juvenile Idiopathic Arthritis	juvenile idiopathic arthritis	EFO_0002609	SparSNP	Lasso penalised linear regression (10-fold cross-validation) on genotypes . SNPs were initally selected by: significance p < 5e-5, and all SNPs within 1 Mb of the former.	GRCh37	26	0	NR	PGP000052	32887683	10.1136/annrheumdis-2020-217421	TRUE		European:100	European:100	https://ftp.ebi.ac.uk/pub/databases/spot/pgs/scores/PGS000114/ScoringFiles/PGS000114.txt.gz	PGS obtained from the Catalog should be cited appropriately, and used in accordance with any licensing restrictions set by the authors. See EBI Terms of Use (https://www.ebi.ac.uk/about/terms-of-use/) for additional details.
PGS000115	LDL-C_20	low density lipoprotein cholesterol	low density lipoprotein cholesterol measurement	EFO_0004611	Established lipid loci	Independent GWAS-significant SNVs	GRCh37	223	0	NR	PGP000053	32049305	10.1001/jamacardio.2019.5954	TRUE	European:72.4|African:19.3|Hispanic or Latin American:8.3		European:55.6|Multi-ancestry (including European):22.2|African:11.1|East Asian:11.1	https://ftp.ebi.ac.uk/pub/databases/spot/pgs/scores/PGS000115/ScoringFiles/PGS000115.txt.gz	PGS obtained from the Catalog should be cited appropriately, and used in accordance with any licensing restrictions set by the authors. See EBI Terms of Use (https://www.ebi.ac.uk/about/terms-of-use/) for additional details.
PGS000116	CAD_EJ2020	Coronary Artery Disease	coronary artery disease	EFO_0001645	Lassosum	INFO score>0.999; N=1,037,385 variants; s=0.5; lambda=0.00428	GRCh37	40079	0	NR	PGP000054	32068818	10.1001/jama.2019.22241	TRUE	European:75.3|South Asian:13.6|East Asian:6|Hispanic or Latin American:2.2|African:1.7|Greater Middle Eastern:1.2	Multi-ancestry (including European):100	Multi-ancestry (including European):100	https://ftp.ebi.ac.uk/pub/databases/spot/pgs/scores/PGS000116/ScoringFiles/PGS000116.txt.gz	CC0 1.0 Universal (CC0 1.0) Public Domain Dedication
PGS000117	CVD_EJ2020	Cardiovascular Disease	cardiovascular disease	EFO_0000319	Lassosum	INFO score>0.999; N=1,037,385 variants; s=0.5; lambda=0.00429	GRCh37	297862	0	NR	PGP000054	32068818	10.1001/jama.2019.22241	TRUE	European:75.3|South Asian:13.6|East Asian:6|Hispanic or Latin American:2.2|African:1.7|Greater Middle Eastern:1.2	Multi-ancestry (including European):100	Multi-ancestry (including European):100	https://ftp.ebi.ac.uk/pub/databases/spot/pgs/scores/PGS000117/ScoringFiles/PGS000117.txt.gz	CC0 1.0 Universal (CC0 1.0) Public Domain Dedication
PGS000118	MEL29	Melanoma	melanoma	EFO_0000756	GWAS Catalog SNPs	SNPs discovered from GWAS studies with broad European ancestry, LD pruned (r2 > 0.1), filtered SNPs with MAF deviation >15% between GWAS Catalog and MGI. GWAS Study identifiers were not listed.	GRCh37	29	0	NR	PGP000055	31194742	10.1371/journal.pgen.1008202	TRUE		European:100	European:100	https://ftp.ebi.ac.uk/pub/databases/spot/pgs/scores/PGS000118/ScoringFiles/PGS000118.txt.gz	PGS obtained from the Catalog should be cited appropriately, and used in accordance with any licensing restrictions set by the authors. See EBI Terms of Use (https://www.ebi.ac.uk/about/terms-of-use/) for additional details.
PGS000119	BCC32	Basal cell carcinoma	basal cell carcinoma	EFO_0004193	GWAS Catalog SNPs	SNPs discovered from GWAS studies with broad European ancestry, LD pruned (r2 > 0.1), filtered SNPs with MAF deviation >15% between GWAS Catalog and MGI. GWAS Study identifiers were not listed.	GRCh37	32	0	NR	PGP000055	31194742	10.1371/journal.pgen.1008202	TRUE		European:100	European:100	https://ftp.ebi.ac.uk/pub/databases/spot/pgs/scores/PGS000119/ScoringFiles/PGS000119.txt.gz	PGS obtained from the Catalog should be cited appropriately, and used in accordance with any licensing restrictions set by the authors. See EBI Terms of Use (https://www.ebi.ac.uk/about/terms-of-use/) for additional details.
PGS000120	SCC10	Squamous cell carcinoma	squamous cell carcinoma	EFO_0000707	GWAS-significant SNPs	p<5x10-8	GRCh37	10	0	NR	PGP000055	31194742	10.1371/journal.pgen.1008202	TRUE	European:100	European:100	European:100	https://ftp.ebi.ac.uk/pub/databases/spot/pgs/scores/PGS000120/ScoringFiles/PGS000120.txt.gz	PGS obtained from the Catalog should be cited appropriately, and used in accordance with any licensing restrictions set by the authors. See EBI Terms of Use (https://www.ebi.ac.uk/about/terms-of-use/) for additional details.
PGS000121	2018_BMD62_GRS.FN	Bone mineral density (BMD)	bone density	EFO_0003923	Weighted sum of risk alleles		NCBI36	62	0	NR	PGP000056	27649491	10.1002/jbmr.2998	TRUE	European:100		European:100	https://ftp.ebi.ac.uk/pub/databases/spot/pgs/scores/PGS000121/ScoringFiles/PGS000121.txt.gz	PGS obtained from the Catalog should be cited appropriately, and used in accordance with any licensing restrictions set by the authors. See EBI Terms of Use (https://www.ebi.ac.uk/about/terms-of-use/) for additional details.
PGS000122	2018_BMD33_GRS.FN	Bone mineral density (BMD)	bone density	EFO_0003923	Weighted sum of risk alleles (with random forest selection)	SNPs were selected using random forest analysis	NCBI36	33	0	NR	PGP000056	27649491	10.1002/jbmr.2998	TRUE	European:100		European:100	https://ftp.ebi.ac.uk/pub/databases/spot/pgs/scores/PGS000122/ScoringFiles/PGS000122.txt.gz	PGS obtained from the Catalog should be cited appropriately, and used in accordance with any licensing restrictions set by the authors. See EBI Terms of Use (https://www.ebi.ac.uk/about/terms-of-use/) for additional details.
PGS000123	2017_PD16	Parkinson disease	Parkinson disease	MONDO_0005180	GWAS significant SNPs	The PRS was computed using the binary logarithm transformation of the reported ORs	NR	16	0	Log2(OR)	PGP000059	29141588	10.1186/s12883-017-0978-z	TRUE	European:100		European:100	https://ftp.ebi.ac.uk/pub/databases/spot/pgs/scores/PGS000123/ScoringFiles/PGS000123.txt.gz	PGS obtained from the Catalog should be cited appropriately, and used in accordance with any licensing restrictions set by the authors. See EBI Terms of Use (https://www.ebi.ac.uk/about/terms-of-use/) for additional details.
PGS000124	IOP_AS	Intraocular pressure	intraocular pressure measurement	EFO_0004695	GWAS-sgnificant SNPs		hg19	103	0	beta	PGP000061	30054594	10.1038/s41588-018-0176-y	TRUE	European:100		European:100	https://ftp.ebi.ac.uk/pub/databases/spot/pgs/scores/PGS000124/ScoringFiles/PGS000124.txt.gz	PGS obtained from the Catalog should be cited appropriately, and used in accordance with any licensing restrictions set by the authors. See EBI Terms of Use (https://www.ebi.ac.uk/about/terms-of-use/) for additional details.
PGS000125	Qi_T2D_2017	Type 2 Diabetes	type 2 diabetes mellitus	MONDO_0005148	GWAS-significant SNPs	Unweighted allele count	NR	80	0	Dosage	PGP000062	28254843	10.2337/db16-1150	TRUE	European:40.8|East Asian:26.9|African:14.1|South Asian:11.8|Hispanic or Latin American:6.4		Hispanic or Latin American:100	https://ftp.ebi.ac.uk/pub/databases/spot/pgs/scores/PGS000125/ScoringFiles/PGS000125.txt.gz	PGS obtained from the Catalog should be cited appropriately, and used in accordance with any licensing restrictions set by the authors. See EBI Terms of Use (https://www.ebi.ac.uk/about/terms-of-use/) for additional details.
PGS000126	Urate_GRS	Serum urate	urate measurement	EFO_0004531	GWAS-significant SNPs	Conditionally independent GWAS loci in Europeans	GRCh37	114	0	NR	PGP000063	31578528	10.1038/s41588-019-0504-x	TRUE	European:100		European:100	https://ftp.ebi.ac.uk/pub/databases/spot/pgs/scores/PGS000126/ScoringFiles/PGS000126.txt.gz	PGS obtained from the Catalog should be cited appropriately, and used in accordance with any licensing restrictions set by the authors. See EBI Terms of Use (https://www.ebi.ac.uk/about/terms-of-use/) for additional details.
PGS000127	GS-E-EUR	Hemoglobin A1c	HbA1c measurement	EFO_0004541	GWAS	Study-wide multi-ancestry GWAS significant SNPs	NCBI36	21	0	beta	PGP000064	28898252	10.1371/journal.pmed.1002383	TRUE	European:100		European:100	https://ftp.ebi.ac.uk/pub/databases/spot/pgs/scores/PGS000127/ScoringFiles/PGS000127.txt.gz	PGS obtained from the Catalog should be cited appropriately, and used in accordance with any licensing restrictions set by the authors. See EBI Terms of Use (https://www.ebi.ac.uk/about/terms-of-use/) for additional details.
PGS000128	GS-E-AFR	Hemoglobin A1c	HbA1c measurement	EFO_0004541	GWAS	Study-wide multi-ancestry GWAS significant SNPs	NCBI36	22	0	beta	PGP000064	28898252	10.1371/journal.pmed.1002383	TRUE	African:100		African:100	https://ftp.ebi.ac.uk/pub/databases/spot/pgs/scores/PGS000128/ScoringFiles/PGS000128.txt.gz	PGS obtained from the Catalog should be cited appropriately, and used in accordance with any licensing restrictions set by the authors. See EBI Terms of Use (https://www.ebi.ac.uk/about/terms-of-use/) for additional details.
PGS000129	GS-E-EAS	Hemoglobin A1c	HbA1c measurement	EFO_0004541	GWAS	Study-wide multi-ancestry GWAS significant SNPs	NCBI36	17	0	beta	PGP000064	28898252	10.1371/journal.pmed.1002383	TRUE	East Asian:100		East Asian:100	https://ftp.ebi.ac.uk/pub/databases/spot/pgs/scores/PGS000129/ScoringFiles/PGS000129.txt.gz	PGS obtained from the Catalog should be cited appropriately, and used in accordance with any licensing restrictions set by the authors. See EBI Terms of Use (https://www.ebi.ac.uk/about/terms-of-use/) for additional details.
PGS000130	GS-G-EUR	Hemoglobin A1c	HbA1c measurement	EFO_0004541	GWAS	Study-wide multi-ancestry GWAS significant SNPs	NCBI36	19	0	beta	PGP000064	28898252	10.1371/journal.pmed.1002383	TRUE	European:100		European:100	https://ftp.ebi.ac.uk/pub/databases/spot/pgs/scores/PGS000130/ScoringFiles/PGS000130.txt.gz	PGS obtained from the Catalog should be cited appropriately, and used in accordance with any licensing restrictions set by the authors. See EBI Terms of Use (https://www.ebi.ac.uk/about/terms-of-use/) for additional details.
PGS000131	GS-G-AFR	Hemoglobin A1c	HbA1c measurement	EFO_0004541	GWAS	Study-wide multi-ancestry GWAS significant SNPs	NCBI36	19	0	beta	PGP000064	28898252	10.1371/journal.pmed.1002383	TRUE	African:100		African:100	https://ftp.ebi.ac.uk/pub/databases/spot/pgs/scores/PGS000131/ScoringFiles/PGS000131.txt.gz	PGS obtained from the Catalog should be cited appropriately, and used in accordance with any licensing restrictions set by the authors. See EBI Terms of Use (https://www.ebi.ac.uk/about/terms-of-use/) for additional details.
PGS000132	GS-G-EAS	Hemoglobin A1c	HbA1c measurement	EFO_0004541	GWAS	Study-wide multi-ancestry GWAS significant SNPs	NCBI36	19	0	beta	PGP000064	28898252	10.1371/journal.pmed.1002383	TRUE	East Asian:100		East Asian:100	https://ftp.ebi.ac.uk/pub/databases/spot/pgs/scores/PGS000132/ScoringFiles/PGS000132.txt.gz	PGS obtained from the Catalog should be cited appropriately, and used in accordance with any licensing restrictions set by the authors. See EBI Terms of Use (https://www.ebi.ac.uk/about/terms-of-use/) for additional details.
PGS000133	SCZ_BVU	Schizophrenia	schizophrenia	MONDO_0005090	PRS-CS	Bayesian polygenic prediction method, with continuous shrinkage. Parameters: b = 0.5, phi = 1, LD-reference panel = 1000 Genomes Project European samples, # of available SNPs in BVU = 604,645	GRCh37	604645	0	NR	PGP000065	31416338	10.1176/appi.ajp.2019.18091085	TRUE	European:94|East Asian:6		European:100	https://ftp.ebi.ac.uk/pub/databases/spot/pgs/scores/PGS000133/ScoringFiles/PGS000133.txt.gz	PGS obtained from the Catalog should be cited appropriately, and used in accordance with any licensing restrictions set by the authors. See EBI Terms of Use (https://www.ebi.ac.uk/about/terms-of-use/) for additional details.
PGS000134	SCZ_GHS	Schizophrenia	schizophrenia	MONDO_0005090	PRS-CS	Bayesian polygenic prediction method, with continuous shrinkage. Parameters: b = 0.5, phi = 1, LD-reference panel = 1000 Genomes Project European samples, # of available SNPs in GHS = 833,502	GRCh37	830589	0	NR	PGP000065	31416338	10.1176/appi.ajp.2019.18091085	TRUE	European:94|East Asian:6		European:100	https://ftp.ebi.ac.uk/pub/databases/spot/pgs/scores/PGS000134/ScoringFiles/PGS000134.txt.gz	PGS obtained from the Catalog should be cited appropriately, and used in accordance with any licensing restrictions set by the authors. See EBI Terms of Use (https://www.ebi.ac.uk/about/terms-of-use/) for additional details.
PGS000135	SCZ_MTS	Schizophrenia	schizophrenia	MONDO_0005090	PRS-CS	Bayesian polygenic prediction method, with continuous shrinkage. Parameters: b = 0.5, phi = 1, LD-reference panel = 1000 Genomes Project European samples, # of available SNPs in MTS = 971,463	GRCh37	972439	0	NR	PGP000065	31416338	10.1176/appi.ajp.2019.18091085	TRUE	European:94|East Asian:6		European:100	https://ftp.ebi.ac.uk/pub/databases/spot/pgs/scores/PGS000135/ScoringFiles/PGS000135.txt.gz	PGS obtained from the Catalog should be cited appropriately, and used in accordance with any licensing restrictions set by the authors. See EBI Terms of Use (https://www.ebi.ac.uk/about/terms-of-use/) for additional details.
PGS000136	SCZ_PBK	Schizophrenia	schizophrenia	MONDO_0005090	PRS-CS	Bayesian polygenic prediction method, with continuous shrinkage. Parameters: b = 0.5, phi = 1, LD-reference panel = 1000 Genomes Project European samples, # of available SNPs in PBK = 833,502	GRCh37	833502	0	NR	PGP000065	31416338	10.1176/appi.ajp.2019.18091085	TRUE	European:94|East Asian:6		European:100	https://ftp.ebi.ac.uk/pub/databases/spot/pgs/scores/PGS000136/ScoringFiles/PGS000136.txt.gz	PGS obtained from the Catalog should be cited appropriately, and used in accordance with any licensing restrictions set by the authors. See EBI Terms of Use (https://www.ebi.ac.uk/about/terms-of-use/) for additional details.
PGS000137	MTAG_glaucoma	Glaucoma	glaucoma	EFO_0000516	Clumping + Thresholding	r2 = 0.1; p < 0.001	NR	2673	0	NR	PGP000066	31959993	10.1038/s41588-019-0556-y	TRUE	European:100	European:100	European:80|South Asian:20	https://ftp.ebi.ac.uk/pub/databases/spot/pgs/scores/PGS000137/ScoringFiles/PGS000137.txt.gz	PGS obtained from the Catalog should be cited appropriately, and used in accordance with any licensing restrictions set by the authors. See EBI Terms of Use (https://www.ebi.ac.uk/about/terms-of-use/) for additional details.
PGS000138	LifetimeMDD	Lifetime Major Depressive Disorder	major depressive disorder	MONDO_0002009	LD-clumping and p-value thresholding (Ricopilli)	Clumping r2 < 0.1. Scores provided at a p-value threshold = 0.1 (LD-clumped summary statistics require to calculate the score at other threshold are linked in GWAS sample descriptions)	NR	22274	0	NR	PGP000068	32231276	10.1038/s41588-020-0594-5	TRUE	European:100		European:100	https://ftp.ebi.ac.uk/pub/databases/spot/pgs/scores/PGS000138/ScoringFiles/PGS000138.txt.gz	PGS obtained from the Catalog should be cited appropriately, and used in accordance with any licensing restrictions set by the authors. See EBI Terms of Use (https://www.ebi.ac.uk/about/terms-of-use/) for additional details.
PGS000139	MDDRecur	Lifetime Major Depressive Disorder (with recurrence)	major depressive disorder|recurrent	MONDO_0002009|EFO_0010246	LD-clumping and p-value thresholding (Ricopilli)	Clumping r2 < 0.1. Scores provided at a p-value threshold = 0.1 (LD-clumped summary statistics require to calculate the score at other threshold are linked in GWAS sample descriptions)	NR	21980	0	NR	PGP000068	32231276	10.1038/s41588-020-0594-5	TRUE	European:100		European:100	https://ftp.ebi.ac.uk/pub/databases/spot/pgs/scores/PGS000139/ScoringFiles/PGS000139.txt.gz	PGS obtained from the Catalog should be cited appropriately, and used in accordance with any licensing restrictions set by the authors. See EBI Terms of Use (https://www.ebi.ac.uk/about/terms-of-use/) for additional details.
PGS000140	GPpsy	Broad Depression (seen a General Practitioner for nerves, anxiety, tension or depression)	seeing a general practitioner for nerves, anxiety, tension or depression, self-reported|depressive disorder	EFO_0009820|MONDO_0002050	LD-clumping and p-value thresholding (Ricopilli)	Clumping r2 < 0.1. Scores provided at a p-value threshold = 0.1 (LD-clumped summary statistics require to calculate the score at other threshold are linked in GWAS sample descriptions)	NR	24665	0	NR	PGP000068	32231276	10.1038/s41588-020-0594-5	TRUE	European:100		European:100	https://ftp.ebi.ac.uk/pub/databases/spot/pgs/scores/PGS000140/ScoringFiles/PGS000140.txt.gz	PGS obtained from the Catalog should be cited appropriately, and used in accordance with any licensing restrictions set by the authors. See EBI Terms of Use (https://www.ebi.ac.uk/about/terms-of-use/) for additional details.
PGS000141	Psypsy	Seen a psychiatrist for nerves, anxiety, tension or depression	seeing a psychiatrist for nerves, anxiety, tension or depression, self-reported|depressive disorder	EFO_0009821|MONDO_0002050	LD-clumping and p-value thresholding (Ricopilli)	Clumping r2 < 0.1. Scores provided at a p-value threshold = 0.1 (LD-clumped summary statistics require to calculate the score at other threshold are linked in GWAS sample descriptions)	NR	22728	0	NR	PGP000068	32231276	10.1038/s41588-020-0594-5	TRUE	European:100		European:100	https://ftp.ebi.ac.uk/pub/databases/spot/pgs/scores/PGS000141/ScoringFiles/PGS000141.txt.gz	PGS obtained from the Catalog should be cited appropriately, and used in accordance with any licensing restrictions set by the authors. See EBI Terms of Use (https://www.ebi.ac.uk/about/terms-of-use/) for additional details.
PGS000142	DepAll	Probable Depression (low mood or anhedonia, and seen a GP or psychiatrist for nerves, anxiety, tension or depression)	seeing a general practitioner for nerves, anxiety, tension or depression, self-reported|seeing a psychiatrist for nerves, anxiety, tension or depression, self-reported|depressive disorder	EFO_0009820|EFO_0009821|MONDO_0002050	LD-clumping and p-value thresholding (Ricopilli)	Clumping r2 < 0.1. Scores provided at a p-value threshold = 0.1 (LD-clumped summary statistics require to calculate the score at other threshold are linked in GWAS sample descriptions)	NR	21908	0	NR	PGP000068	32231276	10.1038/s41588-020-0594-5	TRUE	European:100		European:100	https://ftp.ebi.ac.uk/pub/databases/spot/pgs/scores/PGS000142/ScoringFiles/PGS000142.txt.gz	PGS obtained from the Catalog should be cited appropriately, and used in accordance with any licensing restrictions set by the authors. See EBI Terms of Use (https://www.ebi.ac.uk/about/terms-of-use/) for additional details.
PGS000143	GPNoDep	Seen a General Practitioner for nerves, anxiety, tension or depression (without report of low mood or anhedonia)	seeing a general practitioner for nerves, anxiety, tension or depression, self-reported	EFO_0009820	LD-clumping and p-value thresholding (Ricopilli)	Clumping r2 < 0.1. Scores provided at a p-value threshold = 0.1 (LD-clumped summary statistics require to calculate the score at other threshold are linked in GWAS sample descriptions)	NR	21042	0	NR	PGP000068	32231276	10.1038/s41588-020-0594-5	TRUE	European:100		European:100	https://ftp.ebi.ac.uk/pub/databases/spot/pgs/scores/PGS000143/ScoringFiles/PGS000143.txt.gz	PGS obtained from the Catalog should be cited appropriately, and used in accordance with any licensing restrictions set by the authors. See EBI Terms of Use (https://www.ebi.ac.uk/about/terms-of-use/) for additional details.
PGS000144	SelfRepDep	Self-reported depression or depression symptoms	self-reported trait|depressive symptom measurement	EFO_0009799|EFO_0007006	LD-clumping and p-value thresholding (Ricopilli)	Clumping r2 < 0.1. Scores provided at a p-value threshold = 0.1 (LD-clumped summary statistics require to calculate the score at other threshold are linked in GWAS sample descriptions)	NR	21828	0	NR	PGP000068	32231276	10.1038/s41588-020-0594-5	TRUE	European:100		European:100	https://ftp.ebi.ac.uk/pub/databases/spot/pgs/scores/PGS000144/ScoringFiles/PGS000144.txt.gz	PGS obtained from the Catalog should be cited appropriately, and used in accordance with any licensing restrictions set by the authors. See EBI Terms of Use (https://www.ebi.ac.uk/about/terms-of-use/) for additional details.
PGS000145	ICD10Dep	Depression (ICD-10 defined)	major depressive disorder	MONDO_0002009	LD-clumping and p-value thresholding (Ricopilli)	Clumping r2 < 0.1. Scores provided at a p-value threshold = 0.1 (LD-clumped summary statistics require to calculate the score at other threshold are linked in GWAS sample descriptions)	NR	21510	0	NR	PGP000068	32231276	10.1038/s41588-020-0594-5	TRUE	European:100		European:100	https://ftp.ebi.ac.uk/pub/databases/spot/pgs/scores/PGS000145/ScoringFiles/PGS000145.txt.gz	PGS obtained from the Catalog should be cited appropriately, and used in accordance with any licensing restrictions set by the authors. See EBI Terms of Use (https://www.ebi.ac.uk/about/terms-of-use/) for additional details.
PGS000146	CRC_GRS_27	Colorectal cancer risk	colorectal cancer	EFO_0005842	GWAS-significant variants	LD r2 > 0.5	hg19	27	0	log(OR)	PGP000069	25683114	10.1053/j.gastro.2015.02.010	TRUE	European:90.5|East Asian:7.4|Not Reported:2.1		European:100	https://ftp.ebi.ac.uk/pub/databases/spot/pgs/scores/PGS000146/ScoringFiles/PGS000146.txt.gz	PGS obtained from the Catalog should be cited appropriately, and used in accordance with any licensing restrictions set by the authors. See EBI Terms of Use (https://www.ebi.ac.uk/about/terms-of-use/) for additional details.
PGS000147	CRC21	Colorectal cancer	colorectal cancer	EFO_0005842	GWAS Catalog SNPs (unweighted allele count)	Variant dosage was calculated as 0, 1, or 2 copies of the risk allele except for the SNP rs5934683 in chromosome X that was coded 0, 0.5, and 1.	NR	21	0	unweighted GRS	PGP000070	28233817	10.1038/srep43263	TRUE	Not Reported:100		European:100	https://ftp.ebi.ac.uk/pub/databases/spot/pgs/scores/PGS000147/ScoringFiles/PGS000147.txt.gz	PGS obtained from the Catalog should be cited appropriately, and used in accordance with any licensing restrictions set by the authors. See EBI Terms of Use (https://www.ebi.ac.uk/about/terms-of-use/) for additional details.
PGS000148	CRC63	Colorectal cancer	colorectal cancer	EFO_0005842	GWAS significant variants	Weights were estimated regression coefficients obtained from a multivariable logistic regression that included 63 previously identified SNPs adjusting for age, sex, genotype platform, and up to 6 principal components (PCs)	NR	63	0	log(OR)	PGP000071	29458155	10.1053/j.gastro.2018.02.021	TRUE	European:100	European:100	European:100	https://ftp.ebi.ac.uk/pub/databases/spot/pgs/scores/PGS000148/ScoringFiles/PGS000148.txt.gz	PGS obtained from the Catalog should be cited appropriately, and used in accordance with any licensing restrictions set by the authors. See EBI Terms of Use (https://www.ebi.ac.uk/about/terms-of-use/) for additional details.
PGS000149	CRC41	Colorectal cancer	colorectal cancer	EFO_0005842	GWAS-significant SNPs	SNPs assembled by Peters et al. Gut (2015; PMID: 26187503)	NR	41	0	log(OR)	PGP000072	30323197	10.1038/s41416-018-0282-8	TRUE			European:100	https://ftp.ebi.ac.uk/pub/databases/spot/pgs/scores/PGS000149/ScoringFiles/PGS000149.txt.gz	PGS obtained from the Catalog should be cited appropriately, and used in accordance with any licensing restrictions set by the authors. See EBI Terms of Use (https://www.ebi.ac.uk/about/terms-of-use/) for additional details.
PGS000150	GRS48	Colorectal cancer	colorectal cancer	EFO_0005842	GWAS-significant SNPs		NR	48	0	NR	PGP000073	29574091	10.1053/j.gastro.2018.03.030	TRUE	European:91.9|East Asian:6.3|Not Reported:1.2|Additional Diverse Ancestries:0.5		European:100	https://ftp.ebi.ac.uk/pub/databases/spot/pgs/scores/PGS000150/ScoringFiles/PGS000150.txt.gz	PGS obtained from the Catalog should be cited appropriately, and used in accordance with any licensing restrictions set by the authors. See EBI Terms of Use (https://www.ebi.ac.uk/about/terms-of-use/) for additional details.
PGS000151	SC_GRS	Colorectal cancer	colorectal cancer	EFO_0005842	GWAS-significant variants	Unweighted sum of risk alleles; r2 threshold = 0.8; MAF > 0.05; p-value < 5e-8 in Asian or European population	GRCh37	14	0	Unweighted	PGP000074	29908285	10.1016/j.gene.2018.06.035	TRUE			East Asian:100	https://ftp.ebi.ac.uk/pub/databases/spot/pgs/scores/PGS000151/ScoringFiles/PGS000151.txt.gz	PGS obtained from the Catalog should be cited appropriately, and used in accordance with any licensing restrictions set by the authors. See EBI Terms of Use (https://www.ebi.ac.uk/about/terms-of-use/) for additional details.
PGS000152	cGRS_Bladder	Bladder cancer	urinary bladder carcinoma	MONDO_0004986	Pruning + Thresholding	GWAS significant and r2 < 0.2. PGS levels were computed as product(dosage*weight/expected risk effect), where the expected risk effect for each variant was calculated based on the risk allele frequence (f) and risk allele weight (OR) as f^2*OR^2 + 2f(1-f)OR + (1-f)^2.	NR	10	0	Odds Ratio over expected risk	PGP000075	30968590	10.1002/cam4.2143	TRUE	European:100		European:100	https://ftp.ebi.ac.uk/pub/databases/spot/pgs/scores/PGS000152/ScoringFiles/PGS000152.txt.gz	PGS obtained from the Catalog should be cited appropriately, and used in accordance with any licensing restrictions set by the authors. See EBI Terms of Use (https://www.ebi.ac.uk/about/terms-of-use/) for additional details.
PGS000153	cGRS_Breast	Breast cancer	breast carcinoma	EFO_0000305	Pruning + Thresholding	GWAS significant and r2 < 0.2. PGS levels were computed as product(dosage*weight/expected risk effect), where the expected risk effect for each variant was calculated based on the risk allele frequence (f) and risk allele weight (OR) as f^2*OR^2 + 2f(1-f)OR + (1-f)^2.	NR	66	0	Odds Ratio over expected risk	PGP000075	30968590	10.1002/cam4.2143	TRUE	European:100		European:100	https://ftp.ebi.ac.uk/pub/databases/spot/pgs/scores/PGS000153/ScoringFiles/PGS000153.txt.gz	PGS obtained from the Catalog should be cited appropriately, and used in accordance with any licensing restrictions set by the authors. See EBI Terms of Use (https://www.ebi.ac.uk/about/terms-of-use/) for additional details.
PGS000154	cGRS_Colorectal	Colorectal cancer	colorectal cancer	EFO_0005842	Pruning + Thresholding	GWAS significant and r2 < 0.2. PGS levels were computed as product(dosage*weight/expected risk effect), where the expected risk effect for each variant was calculated based on the risk allele frequence (f) and risk allele weight (OR) as f^2*OR^2 + 2f(1-f)OR + (1-f)^2.	NR	30	0	Odds Ratio over expected risk	PGP000075	30968590	10.1002/cam4.2143	TRUE	European:96.8|African:3.2		European:100	https://ftp.ebi.ac.uk/pub/databases/spot/pgs/scores/PGS000154/ScoringFiles/PGS000154.txt.gz	PGS obtained from the Catalog should be cited appropriately, and used in accordance with any licensing restrictions set by the authors. See EBI Terms of Use (https://www.ebi.ac.uk/about/terms-of-use/) for additional details.
PGS000155	cGRS_Glioma	Glioma	glioma	EFO_0005543	Pruning + Thresholding	GWAS significant and r2 < 0.2. PGS levels were computed as product(dosage*weight/expected risk effect), where the expected risk effect for each variant was calculated based on the risk allele frequence (f) and risk allele weight (OR) as f^2*OR^2 + 2f(1-f)OR + (1-f)^2.	NR	19	0	Odds Ratio over expected risk	PGP000075	30968590	10.1002/cam4.2143	TRUE	European:100		European:100	https://ftp.ebi.ac.uk/pub/databases/spot/pgs/scores/PGS000155/ScoringFiles/PGS000155.txt.gz	PGS obtained from the Catalog should be cited appropriately, and used in accordance with any licensing restrictions set by the authors. See EBI Terms of Use (https://www.ebi.ac.uk/about/terms-of-use/) for additional details.
PGS000156	cGRS_Lung	Lung cancer	lung carcinoma	EFO_0001071	Pruning + Thresholding	GWAS significant and r2 < 0.2. PGS levels were computed as product(dosage*weight/expected risk effect), where the expected risk effect for each variant was calculated based on the risk allele frequence (f) and risk allele weight (OR) as f^2*OR^2 + 2f(1-f)OR + (1-f)^2.	NR	6	0	Odds Ratio over expected risk	PGP000075	30968590	10.1002/cam4.2143	TRUE	European:100		European:100	https://ftp.ebi.ac.uk/pub/databases/spot/pgs/scores/PGS000156/ScoringFiles/PGS000156.txt.gz	PGS obtained from the Catalog should be cited appropriately, and used in accordance with any licensing restrictions set by the authors. See EBI Terms of Use (https://www.ebi.ac.uk/about/terms-of-use/) for additional details.
PGS000157	cGRS_Melanoma	Melanoma	melanoma	EFO_0000756	Pruning + Thresholding	GWAS significant and r2 < 0.2. PGS levels were computed as product(dosage*weight/expected risk effect), where the expected risk effect for each variant was calculated based on the risk allele frequence (f) and risk allele weight (OR) as f^2*OR^2 + 2f(1-f)OR + (1-f)^2.	NR	17	0	Odds Ratio over expected risk	PGP000075	30968590	10.1002/cam4.2143	TRUE	European:100		European:100	https://ftp.ebi.ac.uk/pub/databases/spot/pgs/scores/PGS000157/ScoringFiles/PGS000157.txt.gz	PGS obtained from the Catalog should be cited appropriately, and used in accordance with any licensing restrictions set by the authors. See EBI Terms of Use (https://www.ebi.ac.uk/about/terms-of-use/) for additional details.
PGS000158	cGRS_Ovarian	Ovarian cancer	ovarian carcinoma	EFO_0001075	Pruning + Thresholding	GWAS significant and r2 < 0.2. PGS levels were computed as product(dosage*weight/expected risk effect), where the expected risk effect for each variant was calculated based on the risk allele frequence (f) and risk allele weight (OR) as f^2*OR^2 + 2f(1-f)OR + (1-f)^2.	NR	11	0	Odds Ratio over expected risk	PGP000075	30968590	10.1002/cam4.2143	TRUE	European:100		European:100	https://ftp.ebi.ac.uk/pub/databases/spot/pgs/scores/PGS000158/ScoringFiles/PGS000158.txt.gz	PGS obtained from the Catalog should be cited appropriately, and used in accordance with any licensing restrictions set by the authors. See EBI Terms of Use (https://www.ebi.ac.uk/about/terms-of-use/) for additional details.
PGS000159	cGRS_Pancreatic	Pancreatic cancer	pancreatic carcinoma	EFO_0002618	Pruning + Thresholding	GWAS significant and r2 < 0.2. PGS levels were computed as product(dosage*weight/expected risk effect), where the expected risk effect for each variant was calculated based on the risk allele frequence (f) and risk allele weight (OR) as f^2*OR^2 + 2f(1-f)OR + (1-f)^2.	NR	9	0	Odds Ratio over expected risk	PGP000075	30968590	10.1002/cam4.2143	TRUE	European:72.5|Not Reported:23.7|Multi-ancestry (excluding European):2.1|Additional Diverse Ancestries:1.2|East Asian:0.4		European:100	https://ftp.ebi.ac.uk/pub/databases/spot/pgs/scores/PGS000159/ScoringFiles/PGS000159.txt.gz	PGS obtained from the Catalog should be cited appropriately, and used in accordance with any licensing restrictions set by the authors. See EBI Terms of Use (https://www.ebi.ac.uk/about/terms-of-use/) for additional details.
PGS000160	cGRS_Prostate	Prostate cancer	prostate carcinoma	EFO_0001663	Pruning + Thresholding	GWAS significant and r2 < 0.2. PGS levels were computed as product(dosage*weight/expected risk effect), where the expected risk effect for each variant was calculated based on the risk allele frequence (f) and risk allele weight (OR) as f^2*OR^2 + 2f(1-f)OR + (1-f)^2.	NR	79	0	Odds Ratio over expected risk	PGP000075	30968590	10.1002/cam4.2143	TRUE	European:91.8|African:3.6|East Asian:2.9|Hispanic or Latin American:1.6		European:100	https://ftp.ebi.ac.uk/pub/databases/spot/pgs/scores/PGS000160/ScoringFiles/PGS000160.txt.gz	PGS obtained from the Catalog should be cited appropriately, and used in accordance with any licensing restrictions set by the authors. See EBI Terms of Use (https://www.ebi.ac.uk/about/terms-of-use/) for additional details.
PGS000161	cGRS_Renal	Renal cancer	renal carcinoma	EFO_0002890	Pruning + Thresholding	GWAS significant and r2 < 0.2. PGS levels were computed as product(dosage*weight/expected risk effect), where the expected risk effect for each variant was calculated based on the risk allele frequence (f) and risk allele weight (OR) as f^2*OR^2 + 2f(1-f)OR + (1-f)^2.	NR	10	0	Odds Ratio over expected risk	PGP000075	30968590	10.1002/cam4.2143	TRUE	European:100		European:100	https://ftp.ebi.ac.uk/pub/databases/spot/pgs/scores/PGS000161/ScoringFiles/PGS000161.txt.gz	PGS obtained from the Catalog should be cited appropriately, and used in accordance with any licensing restrictions set by the authors. See EBI Terms of Use (https://www.ebi.ac.uk/about/terms-of-use/) for additional details.
PGS000162	cGRS_Thyroid	Thyroid cancer	thyroid carcinoma	EFO_0002892	Pruning + Thresholding	GWAS significant and r2 < 0.2. PGS levels were computed as product(dosage*weight/expected risk effect), where the expected risk effect for each variant was calculated based on the risk allele frequence (f) and risk allele weight (OR) as f^2*OR^2 + 2f(1-f)OR + (1-f)^2.	NR	6	0	Odds Ratio over expected risk	PGP000075	30968590	10.1002/cam4.2143	TRUE	European:100		European:100	https://ftp.ebi.ac.uk/pub/databases/spot/pgs/scores/PGS000162/ScoringFiles/PGS000162.txt.gz	PGS obtained from the Catalog should be cited appropriately, and used in accordance with any licensing restrictions set by the authors. See EBI Terms of Use (https://www.ebi.ac.uk/about/terms-of-use/) for additional details.
PGS000163	baso	Basophil count	basophil count	EFO_0005090	Genomewide-significant SNPs	Conditionally independent GWAS associations	GRCh37	185	0	beta	PGP000078	32888494	10.1016/j.cell.2020.08.008	TRUE	European:100		European:100	https://ftp.ebi.ac.uk/pub/databases/spot/pgs/scores/PGS000163/ScoringFiles/PGS000163.txt.gz	PGS obtained from the Catalog should be cited appropriately, and used in accordance with any licensing restrictions set by the authors. See EBI Terms of Use (https://www.ebi.ac.uk/about/terms-of-use/) for additional details.
PGS000164	baso_p	Basophil percentage of white cells	basophil percentage of leukocytes	EFO_0007992	Genomewide-significant SNPs	Conditionally independent GWAS associations	GRCh37	150	0	beta	PGP000078	32888494	10.1016/j.cell.2020.08.008	TRUE	European:100		European:100	https://ftp.ebi.ac.uk/pub/databases/spot/pgs/scores/PGS000164/ScoringFiles/PGS000164.txt.gz	PGS obtained from the Catalog should be cited appropriately, and used in accordance with any licensing restrictions set by the authors. See EBI Terms of Use (https://www.ebi.ac.uk/about/terms-of-use/) for additional details.
PGS000165	eo	Eosinophil count	eosinophil count	EFO_0004842	Genomewide-significant SNPs	Conditionally independent GWAS associations	GRCh37	607	0	beta	PGP000078	32888494	10.1016/j.cell.2020.08.008	TRUE	European:100		European:100	https://ftp.ebi.ac.uk/pub/databases/spot/pgs/scores/PGS000165/ScoringFiles/PGS000165.txt.gz	PGS obtained from the Catalog should be cited appropriately, and used in accordance with any licensing restrictions set by the authors. See EBI Terms of Use (https://www.ebi.ac.uk/about/terms-of-use/) for additional details.
PGS000166	eo_p	Eosinophil percentage of white cells	eosinophil percentage of leukocytes	EFO_0007991	Genomewide-significant SNPs	Conditionally independent GWAS associations	GRCh37	571	0	beta	PGP000078	32888494	10.1016/j.cell.2020.08.008	TRUE	European:100		European:100	https://ftp.ebi.ac.uk/pub/databases/spot/pgs/scores/PGS000166/ScoringFiles/PGS000166.txt.gz	PGS obtained from the Catalog should be cited appropriately, and used in accordance with any licensing restrictions set by the authors. See EBI Terms of Use (https://www.ebi.ac.uk/about/terms-of-use/) for additional details.
PGS000167	hct	Hematocrit	hematocrit	EFO_0004348	Genomewide-significant SNPs	Conditionally independent GWAS associations	GRCh37	502	0	beta	PGP000078	32888494	10.1016/j.cell.2020.08.008	TRUE	European:100		European:66.7|Greater Middle Eastern:33.3	https://ftp.ebi.ac.uk/pub/databases/spot/pgs/scores/PGS000167/ScoringFiles/PGS000167.txt.gz	PGS obtained from the Catalog should be cited appropriately, and used in accordance with any licensing restrictions set by the authors. See EBI Terms of Use (https://www.ebi.ac.uk/about/terms-of-use/) for additional details.
PGS000168	hgb	Hemoglobin concentration	hemoglobin measurement	EFO_0004509	Genomewide-significant SNPs	Conditionally independent GWAS associations	GRCh37	515	0	beta	PGP000078	32888494	10.1016/j.cell.2020.08.008	TRUE	European:100		European:66.7|Greater Middle Eastern:33.3	https://ftp.ebi.ac.uk/pub/databases/spot/pgs/scores/PGS000168/ScoringFiles/PGS000168.txt.gz	PGS obtained from the Catalog should be cited appropriately, and used in accordance with any licensing restrictions set by the authors. See EBI Terms of Use (https://www.ebi.ac.uk/about/terms-of-use/) for additional details.
PGS000169	hlr	High light scatter reticulocyte count	reticulocyte count	EFO_0007986	Genomewide-significant SNPs	Conditionally independent GWAS associations	GRCh37	570	0	beta	PGP000078	32888494	10.1016/j.cell.2020.08.008	TRUE	European:100		European:100	https://ftp.ebi.ac.uk/pub/databases/spot/pgs/scores/PGS000169/ScoringFiles/PGS000169.txt.gz	PGS obtained from the Catalog should be cited appropriately, and used in accordance with any licensing restrictions set by the authors. See EBI Terms of Use (https://www.ebi.ac.uk/about/terms-of-use/) for additional details.
PGS000170	hlr_p	High light scatter reticulocyte percentage of red cells	reticulocyte count	EFO_0007986	Genomewide-significant SNPs	Conditionally independent GWAS associations	GRCh37	566	0	beta	PGP000078	32888494	10.1016/j.cell.2020.08.008	TRUE	European:100		European:100	https://ftp.ebi.ac.uk/pub/databases/spot/pgs/scores/PGS000170/ScoringFiles/PGS000170.txt.gz	PGS obtained from the Catalog should be cited appropriately, and used in accordance with any licensing restrictions set by the authors. See EBI Terms of Use (https://www.ebi.ac.uk/about/terms-of-use/) for additional details.
PGS000171	irf	Immature fraction of reticulocytes	reticulocyte count	EFO_0007986	Genomewide-significant SNPs	Conditionally independent GWAS associations	GRCh37	372	0	beta	PGP000078	32888494	10.1016/j.cell.2020.08.008	TRUE	European:100		European:100	https://ftp.ebi.ac.uk/pub/databases/spot/pgs/scores/PGS000171/ScoringFiles/PGS000171.txt.gz	PGS obtained from the Catalog should be cited appropriately, and used in accordance with any licensing restrictions set by the authors. See EBI Terms of Use (https://www.ebi.ac.uk/about/terms-of-use/) for additional details.
PGS000172	lymph	Lymphocyte count	lymphocyte count	EFO_0004587	Genomewide-significant SNPs	Conditionally independent GWAS associations	GRCh37	621	0	beta	PGP000078	32888494	10.1016/j.cell.2020.08.008	TRUE	European:100		European:100	https://ftp.ebi.ac.uk/pub/databases/spot/pgs/scores/PGS000172/ScoringFiles/PGS000172.txt.gz	PGS obtained from the Catalog should be cited appropriately, and used in accordance with any licensing restrictions set by the authors. See EBI Terms of Use (https://www.ebi.ac.uk/about/terms-of-use/) for additional details.
PGS000173	lymph_p	Lymphocyte percentage of white cells	lymphocyte percentage of leukocytes	EFO_0007993	Genomewide-significant SNPs	Conditionally independent GWAS associations	GRCh37	472	0	beta	PGP000078	32888494	10.1016/j.cell.2020.08.008	TRUE	European:100		European:100	https://ftp.ebi.ac.uk/pub/databases/spot/pgs/scores/PGS000173/ScoringFiles/PGS000173.txt.gz	PGS obtained from the Catalog should be cited appropriately, and used in accordance with any licensing restrictions set by the authors. See EBI Terms of Use (https://www.ebi.ac.uk/about/terms-of-use/) for additional details.
PGS000174	mch	Mean corpuscular hemoglobin	mean corpuscular hemoglobin	EFO_0004527	Genomewide-significant SNPs	Conditionally independent GWAS associations	GRCh37	628	0	beta	PGP000078	32888494	10.1016/j.cell.2020.08.008	TRUE	European:100		European:66.7|Greater Middle Eastern:33.3	https://ftp.ebi.ac.uk/pub/databases/spot/pgs/scores/PGS000174/ScoringFiles/PGS000174.txt.gz	PGS obtained from the Catalog should be cited appropriately, and used in accordance with any licensing restrictions set by the authors. See EBI Terms of Use (https://www.ebi.ac.uk/about/terms-of-use/) for additional details.
PGS000175	mchc	Mean corpuscular hemoglobin concentration	mean corpuscular hemoglobin concentration	EFO_0004528	Genomewide-significant SNPs	Conditionally independent GWAS associations	GRCh37	224	0	beta	PGP000078	32888494	10.1016/j.cell.2020.08.008	TRUE	European:100		European:66.7|Greater Middle Eastern:33.3	https://ftp.ebi.ac.uk/pub/databases/spot/pgs/scores/PGS000175/ScoringFiles/PGS000175.txt.gz	PGS obtained from the Catalog should be cited appropriately, and used in accordance with any licensing restrictions set by the authors. See EBI Terms of Use (https://www.ebi.ac.uk/about/terms-of-use/) for additional details.
PGS000176	mcv	Mean corpuscular volume	mean corpuscular volume	EFO_0004526	Genomewide-significant SNPs	Conditionally independent GWAS associations	GRCh37	685	0	beta	PGP000078	32888494	10.1016/j.cell.2020.08.008	TRUE	European:100		European:66.7|Greater Middle Eastern:33.3	https://ftp.ebi.ac.uk/pub/databases/spot/pgs/scores/PGS000176/ScoringFiles/PGS000176.txt.gz	PGS obtained from the Catalog should be cited appropriately, and used in accordance with any licensing restrictions set by the authors. See EBI Terms of Use (https://www.ebi.ac.uk/about/terms-of-use/) for additional details.
PGS000177	mono	Monocyte count	monocyte count	EFO_0005091	Genomewide-significant SNPs	Conditionally independent GWAS associations	GRCh37	638	0	beta	PGP000078	32888494	10.1016/j.cell.2020.08.008	TRUE	European:100		European:100	https://ftp.ebi.ac.uk/pub/databases/spot/pgs/scores/PGS000177/ScoringFiles/PGS000177.txt.gz	PGS obtained from the Catalog should be cited appropriately, and used in accordance with any licensing restrictions set by the authors. See EBI Terms of Use (https://www.ebi.ac.uk/about/terms-of-use/) for additional details.
PGS000178	mono_p	Monocyte percentage of white cells	monocyte percentage of leukocytes	EFO_0007989	Genomewide-significant SNPs	Conditionally independent GWAS associations	GRCh37	549	0	beta	PGP000078	32888494	10.1016/j.cell.2020.08.008	TRUE	European:100		European:100	https://ftp.ebi.ac.uk/pub/databases/spot/pgs/scores/PGS000178/ScoringFiles/PGS000178.txt.gz	PGS obtained from the Catalog should be cited appropriately, and used in accordance with any licensing restrictions set by the authors. See EBI Terms of Use (https://www.ebi.ac.uk/about/terms-of-use/) for additional details.
PGS000179	mpv	Mean platelet volume	mean platelet volume	EFO_0004584	Genomewide-significant SNPs	Conditionally independent GWAS associations	GRCh37	654	0	beta	PGP000078	32888494	10.1016/j.cell.2020.08.008	TRUE	European:100		European:66.7|Greater Middle Eastern:33.3	https://ftp.ebi.ac.uk/pub/databases/spot/pgs/scores/PGS000179/ScoringFiles/PGS000179.txt.gz	PGS obtained from the Catalog should be cited appropriately, and used in accordance with any licensing restrictions set by the authors. See EBI Terms of Use (https://www.ebi.ac.uk/about/terms-of-use/) for additional details.
PGS000180	mrv	Mean reticulocyte volume	mean reticulocyte volume	EFO_0010701	Genomewide-significant SNPs	Conditionally independent GWAS associations	GRCh37	629	0	beta	PGP000078	32888494	10.1016/j.cell.2020.08.008	TRUE	European:100			https://ftp.ebi.ac.uk/pub/databases/spot/pgs/scores/PGS000180/ScoringFiles/PGS000180.txt.gz	PGS obtained from the Catalog should be cited appropriately, and used in accordance with any licensing restrictions set by the authors. See EBI Terms of Use (https://www.ebi.ac.uk/about/terms-of-use/) for additional details.
PGS000181	mscv	Mean sphered corpuscular volume	mean corpuscular volume	EFO_0004526	Genomewide-significant SNPs	Conditionally independent GWAS associations	GRCh37	761	0	beta	PGP000078	32888494	10.1016/j.cell.2020.08.008	TRUE	European:100			https://ftp.ebi.ac.uk/pub/databases/spot/pgs/scores/PGS000181/ScoringFiles/PGS000181.txt.gz	PGS obtained from the Catalog should be cited appropriately, and used in accordance with any licensing restrictions set by the authors. See EBI Terms of Use (https://www.ebi.ac.uk/about/terms-of-use/) for additional details.
PGS000182	neut	Neutrophil count	neutrophil count	EFO_0004833	Genomewide-significant SNPs	Conditionally independent GWAS associations	GRCh37	492	0	beta	PGP000078	32888494	10.1016/j.cell.2020.08.008	TRUE	European:100		European:100	https://ftp.ebi.ac.uk/pub/databases/spot/pgs/scores/PGS000182/ScoringFiles/PGS000182.txt.gz	PGS obtained from the Catalog should be cited appropriately, and used in accordance with any licensing restrictions set by the authors. See EBI Terms of Use (https://www.ebi.ac.uk/about/terms-of-use/) for additional details.
PGS000183	neut_p	Neutrophil percentage of white cells	neutrophil percentage of leukocytes	EFO_0007990	Genomewide-significant SNPs	Conditionally independent GWAS associations	GRCh37	437	0	beta	PGP000078	32888494	10.1016/j.cell.2020.08.008	TRUE	European:100		European:100	https://ftp.ebi.ac.uk/pub/databases/spot/pgs/scores/PGS000183/ScoringFiles/PGS000183.txt.gz	PGS obtained from the Catalog should be cited appropriately, and used in accordance with any licensing restrictions set by the authors. See EBI Terms of Use (https://www.ebi.ac.uk/about/terms-of-use/) for additional details.
PGS000184	pct	Plateletcrit	platelet crit	EFO_0007985	Genomewide-significant SNPs	Conditionally independent GWAS associations	GRCh37	700	0	beta	PGP000078	32888494	10.1016/j.cell.2020.08.008	TRUE	European:100		European:100	https://ftp.ebi.ac.uk/pub/databases/spot/pgs/scores/PGS000184/ScoringFiles/PGS000184.txt.gz	PGS obtained from the Catalog should be cited appropriately, and used in accordance with any licensing restrictions set by the authors. See EBI Terms of Use (https://www.ebi.ac.uk/about/terms-of-use/) for additional details.
PGS000185	pdw	Platelet distribution width	platelet component distribution width	EFO_0007984	Genomewide-significant SNPs	Conditionally independent GWAS associations	GRCh37	555	0	beta	PGP000078	32888494	10.1016/j.cell.2020.08.008	TRUE	European:100		European:100	https://ftp.ebi.ac.uk/pub/databases/spot/pgs/scores/PGS000185/ScoringFiles/PGS000185.txt.gz	PGS obtained from the Catalog should be cited appropriately, and used in accordance with any licensing restrictions set by the authors. See EBI Terms of Use (https://www.ebi.ac.uk/about/terms-of-use/) for additional details.
PGS000186	plt	Platelet count	platelet count	EFO_0004309	Genomewide-significant SNPs	Conditionally independent GWAS associations	GRCh37	739	0	beta	PGP000078	32888494	10.1016/j.cell.2020.08.008	TRUE	European:100		European:66.7|Greater Middle Eastern:33.3	https://ftp.ebi.ac.uk/pub/databases/spot/pgs/scores/PGS000186/ScoringFiles/PGS000186.txt.gz	PGS obtained from the Catalog should be cited appropriately, and used in accordance with any licensing restrictions set by the authors. See EBI Terms of Use (https://www.ebi.ac.uk/about/terms-of-use/) for additional details.
PGS000187	rbc	Red blood cell count	erythrocyte count	EFO_0004305	Genomewide-significant SNPs	Conditionally independent GWAS associations	GRCh37	678	0	beta	PGP000078	32888494	10.1016/j.cell.2020.08.008	TRUE	European:100		European:66.7|Greater Middle Eastern:33.3	https://ftp.ebi.ac.uk/pub/databases/spot/pgs/scores/PGS000187/ScoringFiles/PGS000187.txt.gz	PGS obtained from the Catalog should be cited appropriately, and used in accordance with any licensing restrictions set by the authors. See EBI Terms of Use (https://www.ebi.ac.uk/about/terms-of-use/) for additional details.
PGS000188	rdw	Red cell distribution width	red blood cell distribution width	EFO_0005192	Genomewide-significant SNPs	Conditionally independent GWAS associations	GRCh37	546	0	beta	PGP000078	32888494	10.1016/j.cell.2020.08.008	TRUE	European:100		European:100	https://ftp.ebi.ac.uk/pub/databases/spot/pgs/scores/PGS000188/ScoringFiles/PGS000188.txt.gz	PGS obtained from the Catalog should be cited appropriately, and used in accordance with any licensing restrictions set by the authors. See EBI Terms of Use (https://www.ebi.ac.uk/about/terms-of-use/) for additional details.
PGS000189	ret	Reticulocyte count	reticulocyte count	EFO_0007986	Genomewide-significant SNPs	Conditionally independent GWAS associations	GRCh37	555	0	beta	PGP000078	32888494	10.1016/j.cell.2020.08.008	TRUE	European:100		European:100	https://ftp.ebi.ac.uk/pub/databases/spot/pgs/scores/PGS000189/ScoringFiles/PGS000189.txt.gz	PGS obtained from the Catalog should be cited appropriately, and used in accordance with any licensing restrictions set by the authors. See EBI Terms of Use (https://www.ebi.ac.uk/about/terms-of-use/) for additional details.
PGS000190	ret_p	Reticulocyte fraction of red cells	reticulocyte count	EFO_0007986	Genomewide-significant SNPs	Conditionally independent GWAS associations	GRCh37	537	0	beta	PGP000078	32888494	10.1016/j.cell.2020.08.008	TRUE	European:100		European:100	https://ftp.ebi.ac.uk/pub/databases/spot/pgs/scores/PGS000190/ScoringFiles/PGS000190.txt.gz	PGS obtained from the Catalog should be cited appropriately, and used in accordance with any licensing restrictions set by the authors. See EBI Terms of Use (https://www.ebi.ac.uk/about/terms-of-use/) for additional details.
PGS000191	wbc	White blood cell count	leukocyte count	EFO_0004308	Genomewide-significant SNPs	Conditionally independent GWAS associations	GRCh37	636	0	beta	PGP000078	32888494	10.1016/j.cell.2020.08.008	TRUE	European:100		European:66.7|Greater Middle Eastern:33.3	https://ftp.ebi.ac.uk/pub/databases/spot/pgs/scores/PGS000191/ScoringFiles/PGS000191.txt.gz	PGS obtained from the Catalog should be cited appropriately, and used in accordance with any licensing restrictions set by the authors. See EBI Terms of Use (https://www.ebi.ac.uk/about/terms-of-use/) for additional details.
PGS000192	GS9	Cholesterol	high density lipoprotein cholesterol measurement|low density lipoprotein cholesterol measurement	EFO_0004612|EFO_0004611	Curated variant associations	Correlated SNPs were pruned from the score	NCBI35	9	0	Unweighted	PGP000079	18354102	10.1056/nejmoa0706728	TRUE	European:47.7|Not Reported:44.4|African:5.9|Hispanic or Latin American:2		European:100	https://ftp.ebi.ac.uk/pub/databases/spot/pgs/scores/PGS000192/ScoringFiles/PGS000192.txt.gz	PGS obtained from the Catalog should be cited appropriately, and used in accordance with any licensing restrictions set by the authors. See EBI Terms of Use (https://www.ebi.ac.uk/about/terms-of-use/) for additional details.
PGS000193	MDD_0.001_Coleman_2020	Major depression	major depressive disorder	MONDO_0002009	PRSice	PRSice 2.1.0.beta; pThreshold = 0.001;--clump-kb 250;--clump-p 1; --clump-r2 0.1;--info-base INFO,0.9;--model add;--stat OR; Effect allele is A1	hg19	1138	0	log(OR)	PGS000080	31969693	10.1038/s41380-019-0546-6	FALSE	European:100		European:100	https://ftp.ebi.ac.uk/pub/databases/spot/pgs/scores/PGS000193/ScoringFiles/PGS000193.txt.gz	PGS obtained from the Catalog should be cited appropriately, and used in accordance with any licensing restrictions set by the authors. See EBI Terms of Use (https://www.ebi.ac.uk/about/terms-of-use/) for additional details.
PGS000194	G-PROB_Rapos	Rheumatoid Arthritis (CCP-positive)	ACPA-positive rheumatoid arthritis	EFO_0009459	Pruning and Thresholding (P+T)	SNPs with genome-wide significance (p<5e-8) from Immunobase, and LD pruning (r^2>0.8), and HLA variants incorporated in a probabilistic model that take into account predefined (sex specific) disease prevalence, and assuming a patient has one of the 5 possible arthritic diseases. See papers for detailed calculation of Gprob, and OR/weight shrinkage.	GRCh38	250	0	log(OR)	PGP000081	32461333	10.1126/scitranslmed.aay1548	TRUE	European:88.2|East Asian:11.8		European:66.7|Multi-ancestry (including European):33.3	https://ftp.ebi.ac.uk/pub/databases/spot/pgs/scores/PGS000194/ScoringFiles/PGS000194.txt.gz	PGS obtained from the Catalog should be cited appropriately, and used in accordance with any licensing restrictions set by the authors. See EBI Terms of Use (https://www.ebi.ac.uk/about/terms-of-use/) for additional details.
PGS000195	G-PROB_Raneg	Rheumatoid Arthritis (CCP-negative)	ACPA-negative rheumatoid arthritis	EFO_0009460	Pruning and Thresholding (P+T)	SNPs with genome-wide significance (p<5e-8) from Immunobase, and LD pruning (r^2>0.8), and HLA variants incorporated in a probabilistic model that take into account predefined (sex specific) disease prevalence, and assuming a patient has one of the 5 possible arthritic diseases. See papers for detailed calculation of Gprob, and OR/weight shrinkage.	GRCh38	250	0	log(OR)	PGP000081	32461333	10.1126/scitranslmed.aay1548	TRUE	European:88.2|East Asian:11.8		European:66.7|Multi-ancestry (including European):33.3	https://ftp.ebi.ac.uk/pub/databases/spot/pgs/scores/PGS000195/ScoringFiles/PGS000195.txt.gz	PGS obtained from the Catalog should be cited appropriately, and used in accordance with any licensing restrictions set by the authors. See EBI Terms of Use (https://www.ebi.ac.uk/about/terms-of-use/) for additional details.
PGS000196	G-PROB_SLE	Systemic lupus eythematosus	systemic lupus erythematosus	EFO_0002690	Pruning and Thresholding (P+T)	SNPs with genome-wide significance (p<5e-8) from Immunobase, and LD pruning (r^2>0.8), and HLA variants incorporated in a probabilistic model that take into account predefined (sex specific) disease prevalence, and assuming a patient has one of the 5 possible arthritic diseases. See papers for detailed calculation of Gprob, and OR/weight shrinkage.	GRCh38	250	0	log(OR)	PGP000081	32461333	10.1126/scitranslmed.aay1548	TRUE	European:100		European:66.7|Multi-ancestry (including European):33.3	https://ftp.ebi.ac.uk/pub/databases/spot/pgs/scores/PGS000196/ScoringFiles/PGS000196.txt.gz	PGS obtained from the Catalog should be cited appropriately, and used in accordance with any licensing restrictions set by the authors. See EBI Terms of Use (https://www.ebi.ac.uk/about/terms-of-use/) for additional details.
PGS000197	G-PROB_SpA	Spondyloarthroparthy	spondyloarthropathy	EFO_0000706	Pruning and Thresholding (P+T)	SNPs with genome-wide significance (p<5e-8) from Immunobase, and LD pruning (r^2>0.8), and HLA variants incorporated in a probabilistic model that take into account predefined (sex specific) disease prevalence, and assuming a patient has one of the 5 possible arthritic diseases. See papers for detailed calculation of Gprob, and OR/weight shrinkage.	GRCh38	250	0	log(OR)	PGP000081	32461333	10.1126/scitranslmed.aay1548	TRUE	European:90.5|East Asian:9.5		European:66.7|Multi-ancestry (including European):33.3	https://ftp.ebi.ac.uk/pub/databases/spot/pgs/scores/PGS000197/ScoringFiles/PGS000197.txt.gz	PGS obtained from the Catalog should be cited appropriately, and used in accordance with any licensing restrictions set by the authors. See EBI Terms of Use (https://www.ebi.ac.uk/about/terms-of-use/) for additional details.
PGS000198	G-PROB_PsA	Psoriatic arthritis	psoriatic arthritis	EFO_0003778	Pruning and Thresholding (P+T)	SNPs with genome-wide significance (p<5e-8) from Immunobase, and LD pruning (r^2>0.8), and HLA variants incorporated in a probabilistic model that take into account predefined (sex specific) disease prevalence, and assuming a patient has one of the 5 possible arthritic diseases. See papers for detailed calculation of Gprob, and OR/weight shrinkage.	GRCh38	250	0	log(OR)	PGP000081	32461333	10.1126/scitranslmed.aay1548	TRUE	European:78.2|East Asian:21.8		European:66.7|Multi-ancestry (including European):33.3	https://ftp.ebi.ac.uk/pub/databases/spot/pgs/scores/PGS000198/ScoringFiles/PGS000198.txt.gz	PGS obtained from the Catalog should be cited appropriately, and used in accordance with any licensing restrictions set by the authors. See EBI Terms of Use (https://www.ebi.ac.uk/about/terms-of-use/) for additional details.
PGS000199	G-PROB_Gout	Gout	gout	EFO_0004274	Pruning and Thresholding (P+T)	SNPs with genome-wide significance (p<5e-8) from Immunobase, and LD pruning (r^2>0.8), and HLA variants incorporated in a probabilistic model that take into account predefined (sex specific) disease prevalence, and assuming a patient has one of the 5 possible arthritic diseases. See papers for detailed calculation of Gprob, and OR/weight shrinkage.	GRCh38	250	0	NR	PGP000081	32461333	10.1126/scitranslmed.aay1548	TRUE	European:100		European:66.7|Multi-ancestry (including European):33.3	https://ftp.ebi.ac.uk/pub/databases/spot/pgs/scores/PGS000199/ScoringFiles/PGS000199.txt.gz	PGS obtained from the Catalog should be cited appropriately, and used in accordance with any licensing restrictions set by the authors. See EBI Terms of Use (https://www.ebi.ac.uk/about/terms-of-use/) for additional details.
PGS000200	GRS28	Coronary heart disease	coronary artery disease	EFO_0001645	GWAS significant SNPs		NR	28	0	log(OR)	PGP000082	23599444	10.1161/atvbaha.112.301120	TRUE	European:88.3|South Asian:11.7		European:55.6|African:22.2|Hispanic or Latin American:22.2	https://ftp.ebi.ac.uk/pub/databases/spot/pgs/scores/PGS000200/ScoringFiles/PGS000200.txt.gz	PGS obtained from the Catalog should be cited appropriately, and used in accordance with any licensing restrictions set by the authors. See EBI Terms of Use (https://www.ebi.ac.uk/about/terms-of-use/) for additional details.
PGS000201	PROB_ALC_COGA	Problematic Alcohol Use	alcohol dependence measurement	EFO_0007835	PRS-CS	LD-reference panel = 1000G Europeans; SNPs selected to overlap HapMap3 and COGA	NR	1094954	0	NR	PGP000084	32555147	10.1038/s41398-020-00865-8	TRUE	European:100		European:100	https://ftp.ebi.ac.uk/pub/databases/spot/pgs/scores/PGS000201/ScoringFiles/PGS000201.txt.gz	PGS obtained from the Catalog should be cited appropriately, and used in accordance with any licensing restrictions set by the authors. See EBI Terms of Use (https://www.ebi.ac.uk/about/terms-of-use/) for additional details.
PGS000202	PROB_ALC_FT12	Problematic Alcohol Use	alcohol dependence measurement	EFO_0007835	PRS-CS	LD-reference panel = 1000G Europeans; SNPs selected to overlap HapMap3 and FinnTwin12 Study	NR	1083002	0	NR	PGP000084	32555147	10.1038/s41398-020-00865-8	TRUE	European:100		European:100	https://ftp.ebi.ac.uk/pub/databases/spot/pgs/scores/PGS000202/ScoringFiles/PGS000202.txt.gz	PGS obtained from the Catalog should be cited appropriately, and used in accordance with any licensing restrictions set by the authors. See EBI Terms of Use (https://www.ebi.ac.uk/about/terms-of-use/) for additional details.
PGS000203	GSCAN_DPW_COGA	Alcohol consumption (drinks per week)	alcohol consumption measurement	EFO_0007878	PRS-CS	LD-reference panel = 1000G Europeans; SNPs selected to overlap HapMap3 and COGA	NR	1110910	0	NR	PGP000084	32555147	10.1038/s41398-020-00865-8	TRUE	European:100		European:100	https://ftp.ebi.ac.uk/pub/databases/spot/pgs/scores/PGS000203/ScoringFiles/PGS000203.txt.gz	PGS obtained from the Catalog should be cited appropriately, and used in accordance with any licensing restrictions set by the authors. See EBI Terms of Use (https://www.ebi.ac.uk/about/terms-of-use/) for additional details.
PGS000204	GSCAN_DPW_FT12	Alcohol consumption (drinks per week)	alcohol consumption measurement	EFO_0007878	PRS-CS	LD-reference panel = 1000G Europeans; SNPs selected to overlap HapMap3 and FinnTwin12 Study	NR	1099480	0	NR	PGP000084	32555147	10.1038/s41398-020-00865-8	TRUE	European:100		European:100	https://ftp.ebi.ac.uk/pub/databases/spot/pgs/scores/PGS000204/ScoringFiles/PGS000204.txt.gz	PGS obtained from the Catalog should be cited appropriately, and used in accordance with any licensing restrictions set by the authors. See EBI Terms of Use (https://www.ebi.ac.uk/about/terms-of-use/) for additional details.
PGS000205	RISK_PC_COGA	Risk-taking tendency (4-domain principal component model)	risk-taking behaviour	EFO_0008579	PRS-CS	LD-reference panel = 1000G Europeans; SNPs selected to overlap HapMap3 and COGA	NR	1110737	0	NR	PGP000084	32555147	10.1038/s41398-020-00865-8	TRUE	European:100		European:100	https://ftp.ebi.ac.uk/pub/databases/spot/pgs/scores/PGS000205/ScoringFiles/PGS000205.txt.gz	PGS obtained from the Catalog should be cited appropriately, and used in accordance with any licensing restrictions set by the authors. See EBI Terms of Use (https://www.ebi.ac.uk/about/terms-of-use/) for additional details.
PGS000206	RISK_PC_FT12	Risk-taking tendency (4-domain principal component model)	risk-taking behaviour	EFO_0008579	PRS-CS	LD-reference panel = 1000G Europeans; SNPs selected to overlap HapMap3 and FinnTwin12 Study	NR	1098765	0	NR	PGP000084	32555147	10.1038/s41398-020-00865-8	TRUE	European:100		European:100	https://ftp.ebi.ac.uk/pub/databases/spot/pgs/scores/PGS000206/ScoringFiles/PGS000206.txt.gz	PGS obtained from the Catalog should be cited appropriately, and used in accordance with any licensing restrictions set by the authors. See EBI Terms of Use (https://www.ebi.ac.uk/about/terms-of-use/) for additional details.
PGS000207	TC10_Ohio	Thyroid cancer	thyroid carcinoma	EFO_0002892	Genomewide-significant SNPs		GRCh38	10	0	log(OR)	PGP000085	32132206	10.1073/pnas.1919976117	TRUE	European:100		European:100	https://ftp.ebi.ac.uk/pub/databases/spot/pgs/scores/PGS000207/ScoringFiles/PGS000207.txt.gz	PGS obtained from the Catalog should be cited appropriately, and used in accordance with any licensing restrictions set by the authors. See EBI Terms of Use (https://www.ebi.ac.uk/about/terms-of-use/) for additional details.
PGS000208	TC10_Iceland	Thyroid cancer	thyroid carcinoma	EFO_0002892	Genomewide-significant SNPs		GRCh38	10	0	log(OR)	PGP000085	32132206	10.1073/pnas.1919976117	TRUE	European:100		European:100	https://ftp.ebi.ac.uk/pub/databases/spot/pgs/scores/PGS000208/ScoringFiles/PGS000208.txt.gz	PGS obtained from the Catalog should be cited appropriately, and used in accordance with any licensing restrictions set by the authors. See EBI Terms of Use (https://www.ebi.ac.uk/about/terms-of-use/) for additional details.
PGS000209	TC10_UKB	Thyroid cancer	thyroid carcinoma	EFO_0002892	Genomewide-significant SNPs		GRCh38	10	0	log(OR)	PGP000085	32132206	10.1073/pnas.1919976117	TRUE	European:100		European:100	https://ftp.ebi.ac.uk/pub/databases/spot/pgs/scores/PGS000209/ScoringFiles/PGS000209.txt.gz	PGS obtained from the Catalog should be cited appropriately, and used in accordance with any licensing restrictions set by the authors. See EBI Terms of Use (https://www.ebi.ac.uk/about/terms-of-use/) for additional details.
PGS000210	LF279	Lung function (FEV1/FVC)	FEV/FEC ratio	EFO_0004713	GWAS significant variants	Sentinel variants	GRCh37	279	0	NR	PGP000086	30804560	10.1038/s41588-018-0321-7	TRUE	European:100		African:21.4|East Asian:21.4|European:21.4|Additional Diverse Ancestries:21.4|South Asian:14.3	https://ftp.ebi.ac.uk/pub/databases/spot/pgs/scores/PGS000210/ScoringFiles/PGS000210.txt.gz	PGS obtained from the Catalog should be cited appropriately, and used in accordance with any licensing restrictions set by the authors. See EBI Terms of Use (https://www.ebi.ac.uk/about/terms-of-use/) for additional details.
PGS000211	PD19	Parkinson's disease	Parkinson disease	MONDO_0005180	GWAS-significant variants	Replicated variants	NR	19	0	log(OR)	PGP000087	26853697	10.1002/mds.26505	TRUE	European:100		European:100	https://ftp.ebi.ac.uk/pub/databases/spot/pgs/scores/PGS000211/ScoringFiles/PGS000211.txt.gz	PGS obtained from the Catalog should be cited appropriately, and used in accordance with any licensing restrictions set by the authors. See EBI Terms of Use (https://www.ebi.ac.uk/about/terms-of-use/) for additional details.
PGS000212	PRS330_LumA	Breast cancer intrinsic-like subtype (luminal A-like)	luminal A breast carcinoma	MONDO_0021116	Fixed-effects two-stage polytomous model	313 variants from Mavaddat et al (PGS000004) plus 17 independent variants (P < 5.0 × 10−8, r2 threshold 0.1) from this publication, weights derived from the all-subtype analysis	GRCh37	330	0	log(OR)	PGP000088	32424353	10.1038/s41588-020-0609-2	TRUE	European:100		European:100	https://ftp.ebi.ac.uk/pub/databases/spot/pgs/scores/PGS000212/ScoringFiles/PGS000212.txt.gz	PGS obtained from the Catalog should be cited appropriately, and used in accordance with any licensing restrictions set by the authors. See EBI Terms of Use (https://www.ebi.ac.uk/about/terms-of-use/) for additional details.
PGS000213	PRS330_LumBHER2neg	Breast cancer intrinsic-like subtype (luminal B/HER2-negative-like)	Her2-receptor negative breast cancer	MONDO_0000618	Fixed-effects two-stage polytomous model	313 variants from Mavaddat et al (PGS000004) plus 17 independent variants (P < 5.0 × 10−8, r2 threshold 0.1) from this publication, weights derived from the all-subtype analysis	GRCh37	330	0	log(OR)	PGP000088	32424353	10.1038/s41588-020-0609-2	TRUE	European:100		European:100	https://ftp.ebi.ac.uk/pub/databases/spot/pgs/scores/PGS000213/ScoringFiles/PGS000213.txt.gz	PGS obtained from the Catalog should be cited appropriately, and used in accordance with any licensing restrictions set by the authors. See EBI Terms of Use (https://www.ebi.ac.uk/about/terms-of-use/) for additional details.
PGS000214	PRS330_LumB	Breast cancer intrinsic-like subtype (luminal B-like)	luminal B breast carcinoma	MONDO_0021115	Fixed-effects two-stage polytomous model	313 variants from Mavaddat et al (PGS000004) plus 17 independent variants (P < 5.0 × 10−8, r2 threshold 0.1) from this publication, weights derived from the all-subtype analysis	GRCh37	330	0	log(OR)	PGP000088	32424353	10.1038/s41588-020-0609-2	TRUE	European:100		European:100	https://ftp.ebi.ac.uk/pub/databases/spot/pgs/scores/PGS000214/ScoringFiles/PGS000214.txt.gz	PGS obtained from the Catalog should be cited appropriately, and used in accordance with any licensing restrictions set by the authors. See EBI Terms of Use (https://www.ebi.ac.uk/about/terms-of-use/) for additional details.
PGS000215	PRS330_HER2	Breast cancer intrinsic-like subtype (HER2-enriched-like)	HER2 Positive Breast Carcinoma	EFO_1000294	Fixed-effects two-stage polytomous model	313 variants from Mavaddat et al (PGS000004) plus 17 independent variants (P < 5.0 × 10−8, r2 threshold 0.1) from this publication, weights derived from the all-subtype analysis	GRCh37	330	0	log(OR)	PGP000088	32424353	10.1038/s41588-020-0609-2	TRUE	European:100		European:100	https://ftp.ebi.ac.uk/pub/databases/spot/pgs/scores/PGS000215/ScoringFiles/PGS000215.txt.gz	PGS obtained from the Catalog should be cited appropriately, and used in accordance with any licensing restrictions set by the authors. See EBI Terms of Use (https://www.ebi.ac.uk/about/terms-of-use/) for additional details.
PGS000216	PRS330_TN	Breast cancer intrinsic-like subtype (triple negative)	triple-negative breast cancer	EFO_0005537	Fixed-effects two-stage polytomous model	313 variants from Mavaddat et al (PGS000004) plus 17 independent variants (P < 5.0 × 10−8, r2 threshold 0.1) from this publication, weights derived from the all-subtype analysis	GRCh37	330	0	log(OR)	PGP000088	32424353	10.1038/s41588-020-0609-2	TRUE	European:100		European:100	https://ftp.ebi.ac.uk/pub/databases/spot/pgs/scores/PGS000216/ScoringFiles/PGS000216.txt.gz	PGS obtained from the Catalog should be cited appropriately, and used in accordance with any licensing restrictions set by the authors. See EBI Terms of Use (https://www.ebi.ac.uk/about/terms-of-use/) for additional details.
PGS000217	ADM	Adrenomedullin (ADM) serum levels	blood protein measurement	EFO_0007937	LDpred	HapMap3 SNPs with MAF >0.05, HWE P>1e-05, imputation quality>0.95, fraction of causal markers 0.01.	GRCh37	552254	0	NR	PGP000089	33067605	10.1038/s42255-020-00287-2	TRUE		European:100	European:100	https://ftp.ebi.ac.uk/pub/databases/spot/pgs/scores/PGS000217/ScoringFiles/PGS000217.txt.gz	PGS obtained from the Catalog should be cited appropriately, and used in accordance with any licensing restrictions set by the authors. See EBI Terms of Use (https://www.ebi.ac.uk/about/terms-of-use/) for additional details.
PGS000218	AGRP	Agouti-related protein (AGRP) serum levels	blood protein measurement	EFO_0007937	LDpred	HapMap3 SNPs with MAF >0.05, HWE P>1e-05, imputation quality>0.95, fraction of causal markers 0.01.	GRCh37	552121	0	NR	PGP000089	33067605	10.1038/s42255-020-00287-2	TRUE		European:100	European:100	https://ftp.ebi.ac.uk/pub/databases/spot/pgs/scores/PGS000218/ScoringFiles/PGS000218.txt.gz	PGS obtained from the Catalog should be cited appropriately, and used in accordance with any licensing restrictions set by the authors. See EBI Terms of Use (https://www.ebi.ac.uk/about/terms-of-use/) for additional details.
PGS000219	CA-125	Ovarian cancer-related tumor marker CA 125 (CA-125) serum levels	blood protein measurement	EFO_0007937	LDpred	HapMap3 SNPs with MAF >0.05, HWE P>1e-05, imputation quality>0.95, fraction of causal markers 1.	GRCh37	553819	0	NR	PGP000089	33067605	10.1038/s42255-020-00287-2	TRUE		European:100	European:100	https://ftp.ebi.ac.uk/pub/databases/spot/pgs/scores/PGS000219/ScoringFiles/PGS000219.txt.gz	PGS obtained from the Catalog should be cited appropriately, and used in accordance with any licensing restrictions set by the authors. See EBI Terms of Use (https://www.ebi.ac.uk/about/terms-of-use/) for additional details.
PGS000220	CCL20	C-C motif chemokine 20 (CCL20) serum levels	blood protein measurement	EFO_0007937	LDpred	HapMap3 SNPs with MAF >0.05, HWE P>1e-05, imputation quality>0.95, fraction of causal markers 0.001.	GRCh37	551989	0	NR	PGP000089	33067605	10.1038/s42255-020-00287-2	TRUE		European:100	European:100	https://ftp.ebi.ac.uk/pub/databases/spot/pgs/scores/PGS000220/ScoringFiles/PGS000220.txt.gz	PGS obtained from the Catalog should be cited appropriately, and used in accordance with any licensing restrictions set by the authors. See EBI Terms of Use (https://www.ebi.ac.uk/about/terms-of-use/) for additional details.
PGS000221	CCL3	C-C motif chemokine 3 (CCL3) serum levels	blood protein measurement	EFO_0007937	LDpred	HapMap3 SNPs with MAF >0.05, HWE P>1e-05, imputation quality>0.95, fraction of causal markers 0.03.	GRCh37	552347	0	NR	PGP000089	33067605	10.1038/s42255-020-00287-2	TRUE		European:100	European:100	https://ftp.ebi.ac.uk/pub/databases/spot/pgs/scores/PGS000221/ScoringFiles/PGS000221.txt.gz	PGS obtained from the Catalog should be cited appropriately, and used in accordance with any licensing restrictions set by the authors. See EBI Terms of Use (https://www.ebi.ac.uk/about/terms-of-use/) for additional details.
PGS000222	CCL4	C-C motif chemokine 4 (CCL4) serum levels	blood protein measurement	EFO_0007937	LDpred	HapMap3 SNPs with MAF >0.05, HWE P>1e-05, imputation quality>0.95, fraction of causal markers 0.001.	GRCh37	552214	0	NR	PGP000089	33067605	10.1038/s42255-020-00287-2	TRUE		European:100	European:100	https://ftp.ebi.ac.uk/pub/databases/spot/pgs/scores/PGS000222/ScoringFiles/PGS000222.txt.gz	PGS obtained from the Catalog should be cited appropriately, and used in accordance with any licensing restrictions set by the authors. See EBI Terms of Use (https://www.ebi.ac.uk/about/terms-of-use/) for additional details.
PGS000223	CD40	Tumor necrosis factor receptor superfamily member 5 (CD40) serum levels	blood protein measurement	EFO_0007937	LDpred	HapMap3 SNPs with MAF >0.05, HWE P>1e-05, imputation quality>0.95, fraction of causal markers 0.01.	GRCh37	552187	0	NR	PGP000089	33067605	10.1038/s42255-020-00287-2	TRUE		European:100	European:100	https://ftp.ebi.ac.uk/pub/databases/spot/pgs/scores/PGS000223/ScoringFiles/PGS000223.txt.gz	PGS obtained from the Catalog should be cited appropriately, and used in accordance with any licensing restrictions set by the authors. See EBI Terms of Use (https://www.ebi.ac.uk/about/terms-of-use/) for additional details.
PGS000224	CHI3L1	Chitinase-3-like protein 1 (CHI3L1) serum levels	blood protein measurement	EFO_0007937	LDpred	HapMap3 SNPs with MAF >0.05, HWE P>1e-05, imputation quality>0.95, fraction of causal markers 0.01.	GRCh37	552106	0	NR	PGP000089	33067605	10.1038/s42255-020-00287-2	TRUE		European:100	European:100	https://ftp.ebi.ac.uk/pub/databases/spot/pgs/scores/PGS000224/ScoringFiles/PGS000224.txt.gz	PGS obtained from the Catalog should be cited appropriately, and used in accordance with any licensing restrictions set by the authors. See EBI Terms of Use (https://www.ebi.ac.uk/about/terms-of-use/) for additional details.
PGS000225	CSF-1	Macrophage colony-stimulating factor 1 (CSF-1) serum levels	blood protein measurement	EFO_0007937	LDpred	HapMap3 SNPs with MAF >0.05, HWE P>1e-05, imputation quality>0.95, fraction of causal markers 1.	GRCh37	552163	0	NR	PGP000089	33067605	10.1038/s42255-020-00287-2	TRUE		European:100	European:100	https://ftp.ebi.ac.uk/pub/databases/spot/pgs/scores/PGS000225/ScoringFiles/PGS000225.txt.gz	PGS obtained from the Catalog should be cited appropriately, and used in accordance with any licensing restrictions set by the authors. See EBI Terms of Use (https://www.ebi.ac.uk/about/terms-of-use/) for additional details.
PGS000226	CSTB	Cystatin-B (CSTB) serum levels	blood protein measurement	EFO_0007937	LDpred	HapMap3 SNPs with MAF >0.05, HWE P>1e-05, imputation quality>0.95, fraction of causal markers 0.01.	GRCh37	552195	0	NR	PGP000089	33067605	10.1038/s42255-020-00287-2	TRUE		European:100	European:100	https://ftp.ebi.ac.uk/pub/databases/spot/pgs/scores/PGS000226/ScoringFiles/PGS000226.txt.gz	PGS obtained from the Catalog should be cited appropriately, and used in accordance with any licensing restrictions set by the authors. See EBI Terms of Use (https://www.ebi.ac.uk/about/terms-of-use/) for additional details.
PGS000227	CTSD	Cathepsin D (CTSD) serum levels	blood protein measurement	EFO_0007937	LDpred	HapMap3 SNPs with MAF >0.05, HWE P>1e-05, imputation quality>0.95, fraction of causal markers 0.001.	GRCh37	552134	0	NR	PGP000089	33067605	10.1038/s42255-020-00287-2	TRUE		European:100	European:100	https://ftp.ebi.ac.uk/pub/databases/spot/pgs/scores/PGS000227/ScoringFiles/PGS000227.txt.gz	PGS obtained from the Catalog should be cited appropriately, and used in accordance with any licensing restrictions set by the authors. See EBI Terms of Use (https://www.ebi.ac.uk/about/terms-of-use/) for additional details.
PGS000228	CTSL1	Cathepsin L1 (CTSL1) serum levels	blood protein measurement	EFO_0007937	LDpred	HapMap3 SNPs with MAF >0.05, HWE P>1e-05, imputation quality>0.95, fraction of causal markers 0.03.	GRCh37	552084	0	NR	PGP000089	33067605	10.1038/s42255-020-00287-2	TRUE		European:100	European:100	https://ftp.ebi.ac.uk/pub/databases/spot/pgs/scores/PGS000228/ScoringFiles/PGS000228.txt.gz	PGS obtained from the Catalog should be cited appropriately, and used in accordance with any licensing restrictions set by the authors. See EBI Terms of Use (https://www.ebi.ac.uk/about/terms-of-use/) for additional details.
PGS000229	CX3CL1	Fractalkine (CX3CL1) serum levels	blood protein measurement	EFO_0007937	LDpred	HapMap3 SNPs with MAF >0.05, HWE P>1e-05, imputation quality>0.95, fraction of causal markers 0.01.	GRCh37	552274	0	NR	PGP000089	33067605	10.1038/s42255-020-00287-2	TRUE		European:100	European:100	https://ftp.ebi.ac.uk/pub/databases/spot/pgs/scores/PGS000229/ScoringFiles/PGS000229.txt.gz	PGS obtained from the Catalog should be cited appropriately, and used in accordance with any licensing restrictions set by the authors. See EBI Terms of Use (https://www.ebi.ac.uk/about/terms-of-use/) for additional details.
PGS000230	CXCL1	C-X-C motif chemokine 1 (CXCL1) serum levels	blood protein measurement	EFO_0007937	LDpred	HapMap3 SNPs with MAF >0.05, HWE P>1e-05, imputation quality>0.95, fraction of causal markers 0.03.	GRCh37	552234	0	NR	PGP000089	33067605	10.1038/s42255-020-00287-2	TRUE		European:100	European:100	https://ftp.ebi.ac.uk/pub/databases/spot/pgs/scores/PGS000230/ScoringFiles/PGS000230.txt.gz	PGS obtained from the Catalog should be cited appropriately, and used in accordance with any licensing restrictions set by the authors. See EBI Terms of Use (https://www.ebi.ac.uk/about/terms-of-use/) for additional details.
PGS000231	CXCL16	C-X-C motif chemokine 16 (CXCL16) serum levels	blood protein measurement	EFO_0007937	LDpred	HapMap3 SNPs with MAF >0.05, HWE P>1e-05, imputation quality>0.95, fraction of causal markers 0.01.	GRCh37	552241	0	NR	PGP000089	33067605	10.1038/s42255-020-00287-2	TRUE		European:100	European:100	https://ftp.ebi.ac.uk/pub/databases/spot/pgs/scores/PGS000231/ScoringFiles/PGS000231.txt.gz	PGS obtained from the Catalog should be cited appropriately, and used in accordance with any licensing restrictions set by the authors. See EBI Terms of Use (https://www.ebi.ac.uk/about/terms-of-use/) for additional details.
PGS000232	CXCL6	C-X-C motif chemokine 6 (CXCL6) serum levels	blood protein measurement	EFO_0007937	LDpred	HapMap3 SNPs with MAF >0.05, HWE P>1e-05, imputation quality>0.95, fraction of causal markers 0.1.	GRCh37	552061	0	NR	PGP000089	33067605	10.1038/s42255-020-00287-2	TRUE		European:100	European:100	https://ftp.ebi.ac.uk/pub/databases/spot/pgs/scores/PGS000232/ScoringFiles/PGS000232.txt.gz	PGS obtained from the Catalog should be cited appropriately, and used in accordance with any licensing restrictions set by the authors. See EBI Terms of Use (https://www.ebi.ac.uk/about/terms-of-use/) for additional details.
PGS000233	Dkk-1	Dickkopf-related protein 1 (Dkk-1) serum levels	blood protein measurement	EFO_0007937	LDpred	HapMap3 SNPs with MAF >0.05, HWE P>1e-05, imputation quality>0.95, fraction of causal markers 0.1.	GRCh37	552067	0	NR	PGP000089	33067605	10.1038/s42255-020-00287-2	TRUE		European:100	European:100	https://ftp.ebi.ac.uk/pub/databases/spot/pgs/scores/PGS000233/ScoringFiles/PGS000233.txt.gz	PGS obtained from the Catalog should be cited appropriately, and used in accordance with any licensing restrictions set by the authors. See EBI Terms of Use (https://www.ebi.ac.uk/about/terms-of-use/) for additional details.
PGS000234	ECP	Eosinophil cationic protein (ECP) serum levels	blood protein measurement	EFO_0007937	LDpred	HapMap3 SNPs with MAF >0.05, HWE P>1e-05, imputation quality>0.95, fraction of causal markers 1.	GRCh37	553046	0	NR	PGP000089	33067605	10.1038/s42255-020-00287-2	TRUE		European:100	European:100	https://ftp.ebi.ac.uk/pub/databases/spot/pgs/scores/PGS000234/ScoringFiles/PGS000234.txt.gz	PGS obtained from the Catalog should be cited appropriately, and used in accordance with any licensing restrictions set by the authors. See EBI Terms of Use (https://www.ebi.ac.uk/about/terms-of-use/) for additional details.
PGS000235	EGF	Epidermal growth factor (EGF) serum levels	blood protein measurement	EFO_0007937	LDpred	HapMap3 SNPs with MAF >0.05, HWE P>1e-05, imputation quality>0.95, fraction of causal markers 0.01.	GRCh37	553163	0	NR	PGP000089	33067605	10.1038/s42255-020-00287-2	TRUE		European:100	European:100	https://ftp.ebi.ac.uk/pub/databases/spot/pgs/scores/PGS000235/ScoringFiles/PGS000235.txt.gz	PGS obtained from the Catalog should be cited appropriately, and used in accordance with any licensing restrictions set by the authors. See EBI Terms of Use (https://www.ebi.ac.uk/about/terms-of-use/) for additional details.
PGS000236	ESM-1	Endothelial cell-specific molecule 1 (ESM-1) serum levels	blood protein measurement	EFO_0007937	LDpred	HapMap3 SNPs with MAF >0.05, HWE P>1e-05, imputation quality>0.95, fraction of causal markers 0.1.	GRCh37	553240	0	NR	PGP000089	33067605	10.1038/s42255-020-00287-2	TRUE		European:100	European:100	https://ftp.ebi.ac.uk/pub/databases/spot/pgs/scores/PGS000236/ScoringFiles/PGS000236.txt.gz	PGS obtained from the Catalog should be cited appropriately, and used in accordance with any licensing restrictions set by the authors. See EBI Terms of Use (https://www.ebi.ac.uk/about/terms-of-use/) for additional details.
PGS000237	FABP4	Fatty acid-binding protein, adipocyte (FABP4) serum levels	blood protein measurement	EFO_0007937	LDpred	HapMap3 SNPs with MAF >0.05, HWE P>1e-05, imputation quality>0.95, fraction of causal markers 0.3.	GRCh37	552343	0	NR	PGP000089	33067605	10.1038/s42255-020-00287-2	TRUE		European:100	European:100	https://ftp.ebi.ac.uk/pub/databases/spot/pgs/scores/PGS000237/ScoringFiles/PGS000237.txt.gz	PGS obtained from the Catalog should be cited appropriately, and used in accordance with any licensing restrictions set by the authors. See EBI Terms of Use (https://www.ebi.ac.uk/about/terms-of-use/) for additional details.
PGS000238	FAS	Tumor necrosis factor receptor superfamily member 6 (FAS) serum levels	blood protein measurement	EFO_0007937	LDpred	HapMap3 SNPs with MAF >0.05, HWE P>1e-05, imputation quality>0.95, fraction of causal markers 0.03.	GRCh37	552335	0	NR	PGP000089	33067605	10.1038/s42255-020-00287-2	TRUE		European:100	European:100	https://ftp.ebi.ac.uk/pub/databases/spot/pgs/scores/PGS000238/ScoringFiles/PGS000238.txt.gz	PGS obtained from the Catalog should be cited appropriately, and used in accordance with any licensing restrictions set by the authors. See EBI Terms of Use (https://www.ebi.ac.uk/about/terms-of-use/) for additional details.
PGS000239	FGF-23	Fibroblast growth factor 23 (FGF-23) serum levels	blood protein measurement	EFO_0007937	LDpred	HapMap3 SNPs with MAF >0.05, HWE P>1e-05, imputation quality>0.95, fraction of causal markers 1.	GRCh37	552100	0	NR	PGP000089	33067605	10.1038/s42255-020-00287-2	TRUE		European:100	European:100	https://ftp.ebi.ac.uk/pub/databases/spot/pgs/scores/PGS000239/ScoringFiles/PGS000239.txt.gz	PGS obtained from the Catalog should be cited appropriately, and used in accordance with any licensing restrictions set by the authors. See EBI Terms of Use (https://www.ebi.ac.uk/about/terms-of-use/) for additional details.
PGS000240	FS	Follistatin (FS) serum levels	blood protein measurement	EFO_0007937	LDpred	HapMap3 SNPs with MAF >0.05, HWE P>1e-05, imputation quality>0.95, fraction of causal markers 0.1.	GRCh37	552138	0	NR	PGP000089	33067605	10.1038/s42255-020-00287-2	TRUE		European:100	European:100	https://ftp.ebi.ac.uk/pub/databases/spot/pgs/scores/PGS000240/ScoringFiles/PGS000240.txt.gz	PGS obtained from the Catalog should be cited appropriately, and used in accordance with any licensing restrictions set by the authors. See EBI Terms of Use (https://www.ebi.ac.uk/about/terms-of-use/) for additional details.
PGS000241	GAL	Galanin peptides (GAL) serum levels	blood protein measurement	EFO_0007937	LDpred	HapMap3 SNPs with MAF >0.05, HWE P>1e-05, imputation quality>0.95, fraction of causal markers 0.003.	GRCh37	553548	0	NR	PGP000089	33067605	10.1038/s42255-020-00287-2	TRUE		European:100	European:100	https://ftp.ebi.ac.uk/pub/databases/spot/pgs/scores/PGS000241/ScoringFiles/PGS000241.txt.gz	PGS obtained from the Catalog should be cited appropriately, and used in accordance with any licensing restrictions set by the authors. See EBI Terms of Use (https://www.ebi.ac.uk/about/terms-of-use/) for additional details.
PGS000242	Gal-3	Galectin-3 (Gal-3) serum levels	blood protein measurement	EFO_0007937	LDpred	HapMap3 SNPs with MAF >0.05, HWE P>1e-05, imputation quality>0.95, fraction of causal markers 0.3.	GRCh37	552282	0	NR	PGP000089	33067605	10.1038/s42255-020-00287-2	TRUE		European:100	European:100	https://ftp.ebi.ac.uk/pub/databases/spot/pgs/scores/PGS000242/ScoringFiles/PGS000242.txt.gz	PGS obtained from the Catalog should be cited appropriately, and used in accordance with any licensing restrictions set by the authors. See EBI Terms of Use (https://www.ebi.ac.uk/about/terms-of-use/) for additional details.
PGS000243	GDF-15	Growth/differentiation factor 15 (GDF-15) serum levels	blood protein measurement	EFO_0007937	LDpred	HapMap3 SNPs with MAF >0.05, HWE P>1e-05, imputation quality>0.95, fraction of causal markers 0.1.	GRCh37	552228	0	NR	PGP000089	33067605	10.1038/s42255-020-00287-2	TRUE		European:100	European:100	https://ftp.ebi.ac.uk/pub/databases/spot/pgs/scores/PGS000243/ScoringFiles/PGS000243.txt.gz	PGS obtained from the Catalog should be cited appropriately, and used in accordance with any licensing restrictions set by the authors. See EBI Terms of Use (https://www.ebi.ac.uk/about/terms-of-use/) for additional details.
PGS000244	GH	Growth hormone (GH) serum levels	blood protein measurement	EFO_0007937	LDpred	HapMap3 SNPs with MAF >0.05, HWE P>1e-05, imputation quality>0.95, fraction of causal markers 0.1.	GRCh37	552236	0	NR	PGP000089	33067605	10.1038/s42255-020-00287-2	TRUE		European:100	European:100	https://ftp.ebi.ac.uk/pub/databases/spot/pgs/scores/PGS000244/ScoringFiles/PGS000244.txt.gz	PGS obtained from the Catalog should be cited appropriately, and used in accordance with any licensing restrictions set by the authors. See EBI Terms of Use (https://www.ebi.ac.uk/about/terms-of-use/) for additional details.
PGS000245	HB-EGF	Proheparin-binding EGF-like growth factor (HB-EGF) serum levels	blood protein measurement	EFO_0007937	LDpred	HapMap3 SNPs with MAF >0.05, HWE P>1e-05, imputation quality>0.95, fraction of causal markers 0.1.	GRCh37	552108	0	NR	PGP000089	33067605	10.1038/s42255-020-00287-2	TRUE		European:100	European:100	https://ftp.ebi.ac.uk/pub/databases/spot/pgs/scores/PGS000245/ScoringFiles/PGS000245.txt.gz	PGS obtained from the Catalog should be cited appropriately, and used in accordance with any licensing restrictions set by the authors. See EBI Terms of Use (https://www.ebi.ac.uk/about/terms-of-use/) for additional details.
PGS000246	HGF	Hepatocyte growth factor (HGF) serum levels	blood protein measurement	EFO_0007937	LDpred	HapMap3 SNPs with MAF >0.05, HWE P>1e-05, imputation quality>0.95, fraction of causal markers 1.	GRCh37	552104	0	NR	PGP000089	33067605	10.1038/s42255-020-00287-2	TRUE		European:100	European:100	https://ftp.ebi.ac.uk/pub/databases/spot/pgs/scores/PGS000246/ScoringFiles/PGS000246.txt.gz	PGS obtained from the Catalog should be cited appropriately, and used in accordance with any licensing restrictions set by the authors. See EBI Terms of Use (https://www.ebi.ac.uk/about/terms-of-use/) for additional details.
PGS000247	hK11	Kallikrein-11 (hK11) serum levels	blood protein measurement	EFO_0007937	LDpred	HapMap3 SNPs with MAF >0.05, HWE P>1e-05, imputation quality>0.95, fraction of causal markers 0.01.	GRCh37	553239	0	NR	PGP000089	33067605	10.1038/s42255-020-00287-2	TRUE		European:100	European:100	https://ftp.ebi.ac.uk/pub/databases/spot/pgs/scores/PGS000247/ScoringFiles/PGS000247.txt.gz	PGS obtained from the Catalog should be cited appropriately, and used in accordance with any licensing restrictions set by the authors. See EBI Terms of Use (https://www.ebi.ac.uk/about/terms-of-use/) for additional details.
PGS000248	HSP_27	Heat shock 27 kDa protein (HSP_27) serum levels	blood protein measurement	EFO_0007937	LDpred	HapMap3 SNPs with MAF >0.05, HWE P>1e-05, imputation quality>0.95, fraction of causal markers 0.3.	GRCh37	552212	0	NR	PGP000089	33067605	10.1038/s42255-020-00287-2	TRUE		European:100	European:100	https://ftp.ebi.ac.uk/pub/databases/spot/pgs/scores/PGS000248/ScoringFiles/PGS000248.txt.gz	PGS obtained from the Catalog should be cited appropriately, and used in accordance with any licensing restrictions set by the authors. See EBI Terms of Use (https://www.ebi.ac.uk/about/terms-of-use/) for additional details.
PGS000249	IL-18	Interleukin-18 (IL-18) serum levels	blood protein measurement	EFO_0007937	LDpred	HapMap3 SNPs with MAF >0.05, HWE P>1e-05, imputation quality>0.95, fraction of causal markers 1.	GRCh37	552186	0	NR	PGP000089	33067605	10.1038/s42255-020-00287-2	TRUE		European:100	European:100	https://ftp.ebi.ac.uk/pub/databases/spot/pgs/scores/PGS000249/ScoringFiles/PGS000249.txt.gz	PGS obtained from the Catalog should be cited appropriately, and used in accordance with any licensing restrictions set by the authors. See EBI Terms of Use (https://www.ebi.ac.uk/about/terms-of-use/) for additional details.
PGS000250	IL-1ra	Interleukin-1 receptor antagonist protein (IL-1ra) serum levels	blood protein measurement	EFO_0007937	LDpred	HapMap3 SNPs with MAF >0.05, HWE P>1e-05, imputation quality>0.95, fraction of causal markers 1.	GRCh37	551917	0	NR	PGP000089	33067605	10.1038/s42255-020-00287-2	TRUE		European:100	European:100	https://ftp.ebi.ac.uk/pub/databases/spot/pgs/scores/PGS000250/ScoringFiles/PGS000250.txt.gz	PGS obtained from the Catalog should be cited appropriately, and used in accordance with any licensing restrictions set by the authors. See EBI Terms of Use (https://www.ebi.ac.uk/about/terms-of-use/) for additional details.
PGS000251	IL-27	Interleukin-27 (IL-27) serum levels	blood protein measurement	EFO_0007937	LDpred	HapMap3 SNPs with MAF >0.05, HWE P>1e-05, imputation quality>0.95, fraction of causal markers 0.03.	GRCh37	552026	0	NR	PGP000089	33067605	10.1038/s42255-020-00287-2	TRUE		European:100	European:100	https://ftp.ebi.ac.uk/pub/databases/spot/pgs/scores/PGS000251/ScoringFiles/PGS000251.txt.gz	PGS obtained from the Catalog should be cited appropriately, and used in accordance with any licensing restrictions set by the authors. See EBI Terms of Use (https://www.ebi.ac.uk/about/terms-of-use/) for additional details.
PGS000252	IL-6	Interleukin-6 (IL-6) serum levels	blood protein measurement	EFO_0007937	LDpred	HapMap3 SNPs with MAF >0.05, HWE P>1e-05, imputation quality>0.95, fraction of causal markers 0.003.	GRCh37	552426	0	NR	PGP000089	33067605	10.1038/s42255-020-00287-2	TRUE		European:100	European:100	https://ftp.ebi.ac.uk/pub/databases/spot/pgs/scores/PGS000252/ScoringFiles/PGS000252.txt.gz	PGS obtained from the Catalog should be cited appropriately, and used in accordance with any licensing restrictions set by the authors. See EBI Terms of Use (https://www.ebi.ac.uk/about/terms-of-use/) for additional details.
PGS000253	IL-6RA	Interleukin-6 receptor subunit alpha (IL-6RA) serum levels	blood protein measurement	EFO_0007937	LDpred	HapMap3 SNPs with MAF >0.05, HWE P>1e-05, imputation quality>0.95, fraction of causal markers 1.	GRCh37	552132	0	NR	PGP000089	33067605	10.1038/s42255-020-00287-2	TRUE		European:100	European:100	https://ftp.ebi.ac.uk/pub/databases/spot/pgs/scores/PGS000253/ScoringFiles/PGS000253.txt.gz	PGS obtained from the Catalog should be cited appropriately, and used in accordance with any licensing restrictions set by the authors. See EBI Terms of Use (https://www.ebi.ac.uk/about/terms-of-use/) for additional details.
PGS000254	IL-8	Interleukin-8 (IL-8) serum levels	blood protein measurement	EFO_0007937	LDpred	HapMap3 SNPs with MAF >0.05, HWE P>1e-05, imputation quality>0.95, fraction of causal markers 0.1.	GRCh37	551990	0	NR	PGP000089	33067605	10.1038/s42255-020-00287-2	TRUE		European:100	European:100	https://ftp.ebi.ac.uk/pub/databases/spot/pgs/scores/PGS000254/ScoringFiles/PGS000254.txt.gz	PGS obtained from the Catalog should be cited appropriately, and used in accordance with any licensing restrictions set by the authors. See EBI Terms of Use (https://www.ebi.ac.uk/about/terms-of-use/) for additional details.
PGS000255	IL16	Pro-interleukin-16 (IL16) serum levels	blood protein measurement	EFO_0007937	LDpred	HapMap3 SNPs with MAF >0.05, HWE P>1e-05, imputation quality>0.95, fraction of causal markers 0.001.	GRCh37	551884	0	NR	PGP000089	33067605	10.1038/s42255-020-00287-2	TRUE		European:100	European:100	https://ftp.ebi.ac.uk/pub/databases/spot/pgs/scores/PGS000255/ScoringFiles/PGS000255.txt.gz	PGS obtained from the Catalog should be cited appropriately, and used in accordance with any licensing restrictions set by the authors. See EBI Terms of Use (https://www.ebi.ac.uk/about/terms-of-use/) for additional details.
PGS000256	ITGB1BP2	Melusin (ITGB1BP2) serum levels	blood protein measurement	EFO_0007937	LDpred	HapMap3 SNPs with MAF >0.05, HWE P>1e-05, imputation quality>0.95, fraction of causal markers 0.001.	GRCh37	552423	0	NR	PGP000089	33067605	10.1038/s42255-020-00287-2	TRUE		European:100	European:100	https://ftp.ebi.ac.uk/pub/databases/spot/pgs/scores/PGS000256/ScoringFiles/PGS000256.txt.gz	PGS obtained from the Catalog should be cited appropriately, and used in accordance with any licensing restrictions set by the authors. See EBI Terms of Use (https://www.ebi.ac.uk/about/terms-of-use/) for additional details.
PGS000257	KIM-1	Kidney injury molecule 1 (KIM-1) serum levels	blood protein measurement	EFO_0007937	LDpred	HapMap3 SNPs with MAF >0.05, HWE P>1e-05, imputation quality>0.95, fraction of causal markers 0.01.	GRCh37	552062	0	NR	PGP000089	33067605	10.1038/s42255-020-00287-2	TRUE		European:100	European:100	https://ftp.ebi.ac.uk/pub/databases/spot/pgs/scores/PGS000257/ScoringFiles/PGS000257.txt.gz	PGS obtained from the Catalog should be cited appropriately, and used in accordance with any licensing restrictions set by the authors. See EBI Terms of Use (https://www.ebi.ac.uk/about/terms-of-use/) for additional details.
PGS000258	KLK6	Kallikrein-6 (KLK6) serum levels	blood protein measurement	EFO_0007937	LDpred	HapMap3 SNPs with MAF >0.05, HWE P>1e-05, imputation quality>0.95, fraction of causal markers 0.003.	GRCh37	552053	0	NR	PGP000089	33067605	10.1038/s42255-020-00287-2	TRUE		European:100	European:100	https://ftp.ebi.ac.uk/pub/databases/spot/pgs/scores/PGS000258/ScoringFiles/PGS000258.txt.gz	PGS obtained from the Catalog should be cited appropriately, and used in accordance with any licensing restrictions set by the authors. See EBI Terms of Use (https://www.ebi.ac.uk/about/terms-of-use/) for additional details.
PGS000259	LEP	Leptin (LEP) serum levels	blood protein measurement	EFO_0007937	LDpred	HapMap3 SNPs with MAF >0.05, HWE P>1e-05, imputation quality>0.95, fraction of causal markers 1.	GRCh37	552110	0	NR	PGP000089	33067605	10.1038/s42255-020-00287-2	TRUE		European:100	European:100	https://ftp.ebi.ac.uk/pub/databases/spot/pgs/scores/PGS000259/ScoringFiles/PGS000259.txt.gz	PGS obtained from the Catalog should be cited appropriately, and used in accordance with any licensing restrictions set by the authors. See EBI Terms of Use (https://www.ebi.ac.uk/about/terms-of-use/) for additional details.
PGS000260	LOX-1	Lectin-like oxidized LDL receptor 1 (LOX-1) serum levels	blood protein measurement	EFO_0007937	LDpred	HapMap3 SNPs with MAF >0.05, HWE P>1e-05, imputation quality>0.95, fraction of causal markers 0.1.	GRCh37	552045	0	NR	PGP000089	33067605	10.1038/s42255-020-00287-2	TRUE		European:100	European:100	https://ftp.ebi.ac.uk/pub/databases/spot/pgs/scores/PGS000260/ScoringFiles/PGS000260.txt.gz	PGS obtained from the Catalog should be cited appropriately, and used in accordance with any licensing restrictions set by the authors. See EBI Terms of Use (https://www.ebi.ac.uk/about/terms-of-use/) for additional details.
PGS000261	mAmP	Membrane-bound aminopeptidase P (mAmP) serum levels	blood protein measurement	EFO_0007937	LDpred	HapMap3 SNPs with MAF >0.05, HWE P>1e-05, imputation quality>0.95, fraction of causal markers 0.001.	GRCh37	553070	0	NR	PGP000089	33067605	10.1038/s42255-020-00287-2	TRUE		European:100	European:100	https://ftp.ebi.ac.uk/pub/databases/spot/pgs/scores/PGS000261/ScoringFiles/PGS000261.txt.gz	PGS obtained from the Catalog should be cited appropriately, and used in accordance with any licensing restrictions set by the authors. See EBI Terms of Use (https://www.ebi.ac.uk/about/terms-of-use/) for additional details.
PGS000262	MB	Myoglobin (MB) serum levels	blood protein measurement	EFO_0007937	LDpred	HapMap3 SNPs with MAF >0.05, HWE P>1e-05, imputation quality>0.95, fraction of causal markers 0.03.	GRCh37	552171	0	NR	PGP000089	33067605	10.1038/s42255-020-00287-2	TRUE		European:100	European:100	https://ftp.ebi.ac.uk/pub/databases/spot/pgs/scores/PGS000262/ScoringFiles/PGS000262.txt.gz	PGS obtained from the Catalog should be cited appropriately, and used in accordance with any licensing restrictions set by the authors. See EBI Terms of Use (https://www.ebi.ac.uk/about/terms-of-use/) for additional details.
PGS000263	MCP-1	Monocyte chemotactic protein 1 (MCP-1) serum levels	blood protein measurement	EFO_0007937	LDpred	HapMap3 SNPs with MAF >0.05, HWE P>1e-05, imputation quality>0.95, fraction of causal markers 0.3.	GRCh37	552000	0	NR	PGP000089	33067605	10.1038/s42255-020-00287-2	TRUE		European:100	European:100	https://ftp.ebi.ac.uk/pub/databases/spot/pgs/scores/PGS000263/ScoringFiles/PGS000263.txt.gz	PGS obtained from the Catalog should be cited appropriately, and used in accordance with any licensing restrictions set by the authors. See EBI Terms of Use (https://www.ebi.ac.uk/about/terms-of-use/) for additional details.
PGS000264	MMP-1	Matrix metalloproteinase-1 (MMP-1) serum levels	blood protein measurement	EFO_0007937	LDpred	HapMap3 SNPs with MAF >0.05, HWE P>1e-05, imputation quality>0.95, fraction of causal markers 0.001.	GRCh37	552116	0	NR	PGP000089	33067605	10.1038/s42255-020-00287-2	TRUE		European:100	European:100	https://ftp.ebi.ac.uk/pub/databases/spot/pgs/scores/PGS000264/ScoringFiles/PGS000264.txt.gz	PGS obtained from the Catalog should be cited appropriately, and used in accordance with any licensing restrictions set by the authors. See EBI Terms of Use (https://www.ebi.ac.uk/about/terms-of-use/) for additional details.
PGS000265	MMP-10	Matrix metalloproteinase-10 (MMP-10) serum levels	blood protein measurement	EFO_0007937	LDpred	HapMap3 SNPs with MAF >0.05, HWE P>1e-05, imputation quality>0.95, fraction of causal markers 0.03.	GRCh37	552072	0	NR	PGP000089	33067605	10.1038/s42255-020-00287-2	TRUE		European:100	European:100	https://ftp.ebi.ac.uk/pub/databases/spot/pgs/scores/PGS000265/ScoringFiles/PGS000265.txt.gz	PGS obtained from the Catalog should be cited appropriately, and used in accordance with any licensing restrictions set by the authors. See EBI Terms of Use (https://www.ebi.ac.uk/about/terms-of-use/) for additional details.
PGS000266	MMP-12	Matrix metalloproteinase-12 (MMP-12) serum levels	blood protein measurement	EFO_0007937	LDpred	HapMap3 SNPs with MAF >0.05, HWE P>1e-05, imputation quality>0.95, fraction of causal markers 0.03.	GRCh37	552021	0	NR	PGP000089	33067605	10.1038/s42255-020-00287-2	TRUE		European:100	European:100	https://ftp.ebi.ac.uk/pub/databases/spot/pgs/scores/PGS000266/ScoringFiles/PGS000266.txt.gz	PGS obtained from the Catalog should be cited appropriately, and used in accordance with any licensing restrictions set by the authors. See EBI Terms of Use (https://www.ebi.ac.uk/about/terms-of-use/) for additional details.
PGS000267	MMP-3	Matrix metalloproteinase-3 (MMP-3) serum levels	blood protein measurement	EFO_0007937	LDpred	HapMap3 SNPs with MAF >0.05, HWE P>1e-05, imputation quality>0.95, fraction of causal markers 0.3.	GRCh37	552328	0	NR	PGP000089	33067605	10.1038/s42255-020-00287-2	TRUE		European:100	European:100	https://ftp.ebi.ac.uk/pub/databases/spot/pgs/scores/PGS000267/ScoringFiles/PGS000267.txt.gz	PGS obtained from the Catalog should be cited appropriately, and used in accordance with any licensing restrictions set by the authors. See EBI Terms of Use (https://www.ebi.ac.uk/about/terms-of-use/) for additional details.
PGS000268	MMP-7	Matrix metalloproteinase-7 (MMP-7) serum levels	blood protein measurement	EFO_0007937	LDpred	HapMap3 SNPs with MAF >0.05, HWE P>1e-05, imputation quality>0.95, fraction of causal markers 0.03.	GRCh37	552052	0	NR	PGP000089	33067605	10.1038/s42255-020-00287-2	TRUE		European:100	European:100	https://ftp.ebi.ac.uk/pub/databases/spot/pgs/scores/PGS000268/ScoringFiles/PGS000268.txt.gz	PGS obtained from the Catalog should be cited appropriately, and used in accordance with any licensing restrictions set by the authors. See EBI Terms of Use (https://www.ebi.ac.uk/about/terms-of-use/) for additional details.
PGS000269	MPO	Myeloperoxidase (MPO) serum levels	blood protein measurement	EFO_0007937	LDpred	HapMap3 SNPs with MAF >0.05, HWE P>1e-05, imputation quality>0.95, fraction of causal markers 0.3.	GRCh37	552278	0	NR	PGP000089	33067605	10.1038/s42255-020-00287-2	TRUE		European:100	European:100	https://ftp.ebi.ac.uk/pub/databases/spot/pgs/scores/PGS000269/ScoringFiles/PGS000269.txt.gz	PGS obtained from the Catalog should be cited appropriately, and used in accordance with any licensing restrictions set by the authors. See EBI Terms of Use (https://www.ebi.ac.uk/about/terms-of-use/) for additional details.
PGS000270	NT-pro_BNP	N-terminal prohormone brain natriuretic peptide (NT-pro_BNP) serum levels	blood protein measurement	EFO_0007937	LDpred	HapMap3 SNPs with MAF >0.05, HWE P>1e-05, imputation quality>0.95, fraction of causal markers 1.	GRCh37	554137	0	NR	PGP000089	33067605	10.1038/s42255-020-00287-2	TRUE		European:100	European:100	https://ftp.ebi.ac.uk/pub/databases/spot/pgs/scores/PGS000270/ScoringFiles/PGS000270.txt.gz	PGS obtained from the Catalog should be cited appropriately, and used in accordance with any licensing restrictions set by the authors. See EBI Terms of Use (https://www.ebi.ac.uk/about/terms-of-use/) for additional details.
PGS000271	OPG	Osteoprotegerin (OPG) serum levels	blood protein measurement	EFO_0007937	LDpred	HapMap3 SNPs with MAF >0.05, HWE P>1e-05, imputation quality>0.95, fraction of causal markers 0.003.	GRCh37	552205	0	NR	PGP000089	33067605	10.1038/s42255-020-00287-2	TRUE		European:100	European:100	https://ftp.ebi.ac.uk/pub/databases/spot/pgs/scores/PGS000271/ScoringFiles/PGS000271.txt.gz	PGS obtained from the Catalog should be cited appropriately, and used in accordance with any licensing restrictions set by the authors. See EBI Terms of Use (https://www.ebi.ac.uk/about/terms-of-use/) for additional details.
PGS000272	PAPPA	Pappalysin-1 (PAPPA) serum levels	blood protein measurement	EFO_0007937	LDpred	HapMap3 SNPs with MAF >0.05, HWE P>1e-05, imputation quality>0.95, fraction of causal markers 0.03.	GRCh37	552298	0	NR	PGP000089	33067605	10.1038/s42255-020-00287-2	TRUE		European:100	European:100	https://ftp.ebi.ac.uk/pub/databases/spot/pgs/scores/PGS000272/ScoringFiles/PGS000272.txt.gz	PGS obtained from the Catalog should be cited appropriately, and used in accordance with any licensing restrictions set by the authors. See EBI Terms of Use (https://www.ebi.ac.uk/about/terms-of-use/) for additional details.
PGS000273	PAR-1	Proteinase-activated receptor 1 (PAR-1) serum levels	blood protein measurement	EFO_0007937	LDpred	HapMap3 SNPs with MAF >0.05, HWE P>1e-05, imputation quality>0.95, fraction of causal markers 0.001.	GRCh37	552202	0	NR	PGP000089	33067605	10.1038/s42255-020-00287-2	TRUE		European:100	European:100	https://ftp.ebi.ac.uk/pub/databases/spot/pgs/scores/PGS000273/ScoringFiles/PGS000273.txt.gz	PGS obtained from the Catalog should be cited appropriately, and used in accordance with any licensing restrictions set by the authors. See EBI Terms of Use (https://www.ebi.ac.uk/about/terms-of-use/) for additional details.
PGS000274	PDGF_subunit_B	Platelet-derived growth factor subunit B (PDGF_subunit_B) serum levels	blood protein measurement	EFO_0007937	LDpred	HapMap3 SNPs with MAF >0.05, HWE P>1e-05, imputation quality>0.95, fraction of causal markers 1.	GRCh37	552265	0	NR	PGP000089	33067605	10.1038/s42255-020-00287-2	TRUE		European:100	European:100	https://ftp.ebi.ac.uk/pub/databases/spot/pgs/scores/PGS000274/ScoringFiles/PGS000274.txt.gz	PGS obtained from the Catalog should be cited appropriately, and used in accordance with any licensing restrictions set by the authors. See EBI Terms of Use (https://www.ebi.ac.uk/about/terms-of-use/) for additional details.
PGS000275	PECAM-1	Platelet endothelial cell adhesion molecule (PECAM-1) serum levels	blood protein measurement	EFO_0007937	LDpred	HapMap3 SNPs with MAF >0.05, HWE P>1e-05, imputation quality>0.95, fraction of causal markers 0.3.	GRCh37	552010	0	NR	PGP000089	33067605	10.1038/s42255-020-00287-2	TRUE		European:100	European:100	https://ftp.ebi.ac.uk/pub/databases/spot/pgs/scores/PGS000275/ScoringFiles/PGS000275.txt.gz	PGS obtained from the Catalog should be cited appropriately, and used in accordance with any licensing restrictions set by the authors. See EBI Terms of Use (https://www.ebi.ac.uk/about/terms-of-use/) for additional details.
PGS000276	PlGF	Placenta growth factor (PlGF) serum levels	blood protein measurement	EFO_0007937	LDpred	HapMap3 SNPs with MAF >0.05, HWE P>1e-05, imputation quality>0.95, fraction of causal markers 0.01.	GRCh37	552275	0	NR	PGP000089	33067605	10.1038/s42255-020-00287-2	TRUE		European:100	European:100	https://ftp.ebi.ac.uk/pub/databases/spot/pgs/scores/PGS000276/ScoringFiles/PGS000276.txt.gz	PGS obtained from the Catalog should be cited appropriately, and used in accordance with any licensing restrictions set by the authors. See EBI Terms of Use (https://www.ebi.ac.uk/about/terms-of-use/) for additional details.
PGS000277	PSGL-1	P-selectin glycoprotein ligand 1 (PSGL-1) serum levels	blood protein measurement	EFO_0007937	LDpred	HapMap3 SNPs with MAF >0.05, HWE P>1e-05, imputation quality>0.95, fraction of causal markers 0.03.	GRCh37	552165	0	NR	PGP000089	33067605	10.1038/s42255-020-00287-2	TRUE		European:100	European:100	https://ftp.ebi.ac.uk/pub/databases/spot/pgs/scores/PGS000277/ScoringFiles/PGS000277.txt.gz	PGS obtained from the Catalog should be cited appropriately, and used in accordance with any licensing restrictions set by the authors. See EBI Terms of Use (https://www.ebi.ac.uk/about/terms-of-use/) for additional details.
PGS000278	PTX3	Pentraxin-related protein PTX3 (PTX3) serum levels	blood protein measurement	EFO_0007937	LDpred	HapMap3 SNPs with MAF >0.05, HWE P>1e-05, imputation quality>0.95, fraction of causal markers 0.003.	GRCh37	552474	0	NR	PGP000089	33067605	10.1038/s42255-020-00287-2	TRUE		European:100	European:100	https://ftp.ebi.ac.uk/pub/databases/spot/pgs/scores/PGS000278/ScoringFiles/PGS000278.txt.gz	PGS obtained from the Catalog should be cited appropriately, and used in accordance with any licensing restrictions set by the authors. See EBI Terms of Use (https://www.ebi.ac.uk/about/terms-of-use/) for additional details.
PGS000279	RAGE	Receptor for advanced glycosylation end products (RAGE) serum levels	blood protein measurement	EFO_0007937	LDpred	HapMap3 SNPs with MAF >0.05, HWE P>1e-05, imputation quality>0.95, fraction of causal markers 0.01.	GRCh37	552298	0	NR	PGP000089	33067605	10.1038/s42255-020-00287-2	TRUE		European:100	European:100	https://ftp.ebi.ac.uk/pub/databases/spot/pgs/scores/PGS000279/ScoringFiles/PGS000279.txt.gz	PGS obtained from the Catalog should be cited appropriately, and used in accordance with any licensing restrictions set by the authors. See EBI Terms of Use (https://www.ebi.ac.uk/about/terms-of-use/) for additional details.
PGS000280	REN	Renin (REN) serum levels	blood protein measurement	EFO_0007937	LDpred	HapMap3 SNPs with MAF >0.05, HWE P>1e-05, imputation quality>0.95, fraction of causal markers 0.001.	GRCh37	552078	0	NR	PGP000089	33067605	10.1038/s42255-020-00287-2	TRUE		European:100	European:100	https://ftp.ebi.ac.uk/pub/databases/spot/pgs/scores/PGS000280/ScoringFiles/PGS000280.txt.gz	PGS obtained from the Catalog should be cited appropriately, and used in accordance with any licensing restrictions set by the authors. See EBI Terms of Use (https://www.ebi.ac.uk/about/terms-of-use/) for additional details.
PGS000281	RETN	Resistin (RETN) serum levels	blood protein measurement	EFO_0007937	LDpred	HapMap3 SNPs with MAF >0.05, HWE P>1e-05, imputation quality>0.95, fraction of causal markers 0.01.	GRCh37	552002	0	NR	PGP000089	33067605	10.1038/s42255-020-00287-2	TRUE		European:100	European:100	https://ftp.ebi.ac.uk/pub/databases/spot/pgs/scores/PGS000281/ScoringFiles/PGS000281.txt.gz	PGS obtained from the Catalog should be cited appropriately, and used in accordance with any licensing restrictions set by the authors. See EBI Terms of Use (https://www.ebi.ac.uk/about/terms-of-use/) for additional details.
PGS000282	SCF	Stem cell factor (SCF) serum levels	blood protein measurement	EFO_0007937	LDpred	HapMap3 SNPs with MAF >0.05, HWE P>1e-05, imputation quality>0.95, fraction of causal markers 0.01.	GRCh37	552420	0	NR	PGP000089	33067605	10.1038/s42255-020-00287-2	TRUE		European:100	European:100	https://ftp.ebi.ac.uk/pub/databases/spot/pgs/scores/PGS000282/ScoringFiles/PGS000282.txt.gz	PGS obtained from the Catalog should be cited appropriately, and used in accordance with any licensing restrictions set by the authors. See EBI Terms of Use (https://www.ebi.ac.uk/about/terms-of-use/) for additional details.
PGS000283	SPON1	Spondin-1 (SPON1) serum levels	blood protein measurement	EFO_0007937	LDpred	HapMap3 SNPs with MAF >0.05, HWE P>1e-05, imputation quality>0.95, fraction of causal markers 0.03.	GRCh37	552703	0	NR	PGP000089	33067605	10.1038/s42255-020-00287-2	TRUE		European:100	European:100	https://ftp.ebi.ac.uk/pub/databases/spot/pgs/scores/PGS000283/ScoringFiles/PGS000283.txt.gz	PGS obtained from the Catalog should be cited appropriately, and used in accordance with any licensing restrictions set by the authors. See EBI Terms of Use (https://www.ebi.ac.uk/about/terms-of-use/) for additional details.
PGS000284	ST2	ST2 protein (ST2) serum levels	blood protein measurement	EFO_0007937	LDpred	HapMap3 SNPs with MAF >0.05, HWE P>1e-05, imputation quality>0.95, fraction of causal markers 0.3.	GRCh37	552006	0	NR	PGP000089	33067605	10.1038/s42255-020-00287-2	TRUE		European:100	European:100	https://ftp.ebi.ac.uk/pub/databases/spot/pgs/scores/PGS000284/ScoringFiles/PGS000284.txt.gz	PGS obtained from the Catalog should be cited appropriately, and used in accordance with any licensing restrictions set by the authors. See EBI Terms of Use (https://www.ebi.ac.uk/about/terms-of-use/) for additional details.
PGS000285	TF	Tissue factor (TF) serum levels	blood protein measurement	EFO_0007937	LDpred	HapMap3 SNPs with MAF >0.05, HWE P>1e-05, imputation quality>0.95, fraction of causal markers 1.	GRCh37	552228	0	NR	PGP000089	33067605	10.1038/s42255-020-00287-2	TRUE		European:100	European:100	https://ftp.ebi.ac.uk/pub/databases/spot/pgs/scores/PGS000285/ScoringFiles/PGS000285.txt.gz	PGS obtained from the Catalog should be cited appropriately, and used in accordance with any licensing restrictions set by the authors. See EBI Terms of Use (https://www.ebi.ac.uk/about/terms-of-use/) for additional details.
PGS000286	TM	Thrombomodulin (TM) serum levels	blood protein measurement	EFO_0007937	LDpred	HapMap3 SNPs with MAF >0.05, HWE P>1e-05, imputation quality>0.95, fraction of causal markers 0.01.	GRCh37	552241	0	NR	PGP000089	33067605	10.1038/s42255-020-00287-2	TRUE		European:100	European:100	https://ftp.ebi.ac.uk/pub/databases/spot/pgs/scores/PGS000286/ScoringFiles/PGS000286.txt.gz	PGS obtained from the Catalog should be cited appropriately, and used in accordance with any licensing restrictions set by the authors. See EBI Terms of Use (https://www.ebi.ac.uk/about/terms-of-use/) for additional details.
PGS000287	TNF-R1	Tumor necrosis factor receptor 1 (TNF-R1) serum levels	blood protein measurement	EFO_0007937	LDpred	HapMap3 SNPs with MAF >0.05, HWE P>1e-05, imputation quality>0.95, fraction of causal markers 0.1.	GRCh37	552317	0	NR	PGP000089	33067605	10.1038/s42255-020-00287-2	TRUE		European:100	European:100	https://ftp.ebi.ac.uk/pub/databases/spot/pgs/scores/PGS000287/ScoringFiles/PGS000287.txt.gz	PGS obtained from the Catalog should be cited appropriately, and used in accordance with any licensing restrictions set by the authors. See EBI Terms of Use (https://www.ebi.ac.uk/about/terms-of-use/) for additional details.
PGS000288	TNF-R2	Tumor necrosis factor receptor 2 (TNF-R2) serum levels	blood protein measurement	EFO_0007937	LDpred	HapMap3 SNPs with MAF >0.05, HWE P>1e-05, imputation quality>0.95, fraction of causal markers 1.	GRCh37	552185	0	NR	PGP000089	33067605	10.1038/s42255-020-00287-2	TRUE		European:100	European:100	https://ftp.ebi.ac.uk/pub/databases/spot/pgs/scores/PGS000288/ScoringFiles/PGS000288.txt.gz	PGS obtained from the Catalog should be cited appropriately, and used in accordance with any licensing restrictions set by the authors. See EBI Terms of Use (https://www.ebi.ac.uk/about/terms-of-use/) for additional details.
PGS000289	TNFSF14	Tumor necrosis factor ligand superfamily member 14 (TNFSF14) serum levels	blood protein measurement	EFO_0007937	LDpred	HapMap3 SNPs with MAF >0.05, HWE P>1e-05, imputation quality>0.95, fraction of causal markers 0.01.	GRCh37	552048	0	NR	PGP000089	33067605	10.1038/s42255-020-00287-2	TRUE		European:100	European:100	https://ftp.ebi.ac.uk/pub/databases/spot/pgs/scores/PGS000289/ScoringFiles/PGS000289.txt.gz	PGS obtained from the Catalog should be cited appropriately, and used in accordance with any licensing restrictions set by the authors. See EBI Terms of Use (https://www.ebi.ac.uk/about/terms-of-use/) for additional details.
PGS000290	TRAIL	TNF-related apoptosis-inducing ligand (TRAIL) serum levels	blood protein measurement	EFO_0007937	LDpred	HapMap3 SNPs with MAF >0.05, HWE P>1e-05, imputation quality>0.95, fraction of causal markers 0.003.	GRCh37	552279	0	NR	PGP000089	33067605	10.1038/s42255-020-00287-2	TRUE		European:100	European:100	https://ftp.ebi.ac.uk/pub/databases/spot/pgs/scores/PGS000290/ScoringFiles/PGS000290.txt.gz	PGS obtained from the Catalog should be cited appropriately, and used in accordance with any licensing restrictions set by the authors. See EBI Terms of Use (https://www.ebi.ac.uk/about/terms-of-use/) for additional details.
PGS000291	TRAIL-R2	TNF-related apoptosis-inducing ligand receptor 2 (TRAIL-R2) serum levels	blood protein measurement	EFO_0007937	LDpred	HapMap3 SNPs with MAF >0.05, HWE P>1e-05, imputation quality>0.95, fraction of causal markers 0.01.	GRCh37	552198	0	NR	PGP000089	33067605	10.1038/s42255-020-00287-2	TRUE		European:100	European:100	https://ftp.ebi.ac.uk/pub/databases/spot/pgs/scores/PGS000291/ScoringFiles/PGS000291.txt.gz	PGS obtained from the Catalog should be cited appropriately, and used in accordance with any licensing restrictions set by the authors. See EBI Terms of Use (https://www.ebi.ac.uk/about/terms-of-use/) for additional details.
PGS000292	TRANCE	TNF-related activation-induced cytokine (TRANCE) serum levels	blood protein measurement	EFO_0007937	LDpred	HapMap3 SNPs with MAF >0.05, HWE P>1e-05, imputation quality>0.95, fraction of causal markers 1.	GRCh37	552090	0	NR	PGP000089	33067605	10.1038/s42255-020-00287-2	TRUE		European:100	European:100	https://ftp.ebi.ac.uk/pub/databases/spot/pgs/scores/PGS000292/ScoringFiles/PGS000292.txt.gz	PGS obtained from the Catalog should be cited appropriately, and used in accordance with any licensing restrictions set by the authors. See EBI Terms of Use (https://www.ebi.ac.uk/about/terms-of-use/) for additional details.
PGS000293	U-PAR	Urokinase plasminogen activator surface receptor (U-PAR) serum levels	blood protein measurement	EFO_0007937	LDpred	HapMap3 SNPs with MAF >0.05, HWE P>1e-05, imputation quality>0.95, fraction of causal markers 0.003.	GRCh37	552048	0	NR	PGP000089	33067605	10.1038/s42255-020-00287-2	TRUE		European:100	European:100	https://ftp.ebi.ac.uk/pub/databases/spot/pgs/scores/PGS000293/ScoringFiles/PGS000293.txt.gz	PGS obtained from the Catalog should be cited appropriately, and used in accordance with any licensing restrictions set by the authors. See EBI Terms of Use (https://www.ebi.ac.uk/about/terms-of-use/) for additional details.
PGS000294	VEGF-A	Vascular endothelial growth factor A (VEGF-A) serum levels	blood protein measurement	EFO_0007937	LDpred	HapMap3 SNPs with MAF >0.05, HWE P>1e-05, imputation quality>0.95, fraction of causal markers 0.3.	GRCh37	552070	0	NR	PGP000089	33067605	10.1038/s42255-020-00287-2	TRUE		European:100	European:100	https://ftp.ebi.ac.uk/pub/databases/spot/pgs/scores/PGS000294/ScoringFiles/PGS000294.txt.gz	PGS obtained from the Catalog should be cited appropriately, and used in accordance with any licensing restrictions set by the authors. See EBI Terms of Use (https://www.ebi.ac.uk/about/terms-of-use/) for additional details.
PGS000295	VEGF-D	Vascular endothelial growth factor D (VEGF-D) serum levels	blood protein measurement	EFO_0007937	LDpred	HapMap3 SNPs with MAF >0.05, HWE P>1e-05, imputation quality>0.95, fraction of causal markers 0.03.	GRCh37	551905	0	NR	PGP000089	33067605	10.1038/s42255-020-00287-2	TRUE		European:100	European:100	https://ftp.ebi.ac.uk/pub/databases/spot/pgs/scores/PGS000295/ScoringFiles/PGS000295.txt.gz	PGS obtained from the Catalog should be cited appropriately, and used in accordance with any licensing restrictions set by the authors. See EBI Terms of Use (https://www.ebi.ac.uk/about/terms-of-use/) for additional details.
PGS000296	GPS_CAD_SA	Coronary artery disease	coronary artery disease	EFO_0001645	LDpred	ρ = 0.003; LD panel = 503 1000G Europeans	hg19	6630150	0	NR	PGP000090	32762905	10.1016/j.jacc.2020.06.024	TRUE	European:75.3|South Asian:13.6|East Asian:6|Hispanic or Latin American:2.2|African:1.7|Greater Middle Eastern:1.2	South Asian:100	South Asian:100	https://ftp.ebi.ac.uk/pub/databases/spot/pgs/scores/PGS000296/ScoringFiles/PGS000296.txt.gz	Freely available to the academic community for research use. Parties interested in using the scores for commercial purposes should contact the Broad Office of Strategic Alliances and Partnering (partnering@broadinstitute.org).
PGS000297	GRS3290_Height	Height	body height	EFO_0004339	GWAS-significant (lead and secondary) variants	beta coefficient for effect size after TRAILS' correction and used as weights for the GRS. R2 threshold = 0.1	GRCh37	3290	0	Beta (corrected for sample overlap)	PGP000092	32527150	10.1161/circgen.119.002775	TRUE	European:65.8|Not Reported:34.2		European:90.9|Greater Middle Eastern:9.1	https://ftp.ebi.ac.uk/pub/databases/spot/pgs/scores/PGS000297/ScoringFiles/PGS000297.txt.gz	PGS obtained from the Catalog should be cited appropriately, and used in accordance with any licensing restrictions set by the authors. See EBI Terms of Use (https://www.ebi.ac.uk/about/terms-of-use/) for additional details.
PGS000298	GRS941_BMI	Body mass index	body mass index	EFO_0004340	GWAS-significant (lead and secondary) variants	beta coefficient for effect size after TRAILS' correction and used as weights for the GRS. R2 threshold = 0.1	GRCh37	941	0	Beta (corrected for sample overlap)	PGP000092	32527150	10.1161/circgen.119.002775	TRUE	European:67|Not Reported:33		European:100	https://ftp.ebi.ac.uk/pub/databases/spot/pgs/scores/PGS000298/ScoringFiles/PGS000298.txt.gz	PGS obtained from the Catalog should be cited appropriately, and used in accordance with any licensing restrictions set by the authors. See EBI Terms of Use (https://www.ebi.ac.uk/about/terms-of-use/) for additional details.
PGS000299	GRS462_WHRadjBMI	Waist-to-hip ratio (body mass index adjusted)	BMI-adjusted waist-hip ratio	EFO_0007788	GWAS-significant (lead and secondary) variants	beta coefficient for effect size after TRAILS' correction and used as weights for the GRS. R2 threshold = 0.1	GRCh37	462	0	Beta (corrected for sample overlap)	PGP000092	32527150	10.1161/circgen.119.002775	TRUE	European:100		European:100	https://ftp.ebi.ac.uk/pub/databases/spot/pgs/scores/PGS000299/ScoringFiles/PGS000299.txt.gz	PGS obtained from the Catalog should be cited appropriately, and used in accordance with any licensing restrictions set by the authors. See EBI Terms of Use (https://www.ebi.ac.uk/about/terms-of-use/) for additional details.
PGS000300	GRS80_HR	Heart rate	resting heart rate	EFO_0004351	GWAS-significant (lead and secondary) variants	r2 threshold = 0.1	GRCh37	80	0	Beta	PGP000092	32527150	10.1161/circgen.119.002775	TRUE	European:97.3|Additional Asian Ancestries:1|African:0.7|Not Reported:0.6|Additional Diverse Ancestries:0.3		European:100	https://ftp.ebi.ac.uk/pub/databases/spot/pgs/scores/PGS000300/ScoringFiles/PGS000300.txt.gz	PGS obtained from the Catalog should be cited appropriately, and used in accordance with any licensing restrictions set by the authors. See EBI Terms of Use (https://www.ebi.ac.uk/about/terms-of-use/) for additional details.
PGS000301	GRS970_SBP	Systolic blood pressure	systolic blood pressure	EFO_0006335	GWAS-significant (lead and secondary) variants	beta coefficient for effect size after TRAILS' correction and used as weights for the GRS. R2 threshold = 0.1	GRCh37	970	0	Beta (corrected for sample overlap)	PGP000092	32527150	10.1161/circgen.119.002775	TRUE	European:100		European:100	https://ftp.ebi.ac.uk/pub/databases/spot/pgs/scores/PGS000301/ScoringFiles/PGS000301.txt.gz	PGS obtained from the Catalog should be cited appropriately, and used in accordance with any licensing restrictions set by the authors. See EBI Terms of Use (https://www.ebi.ac.uk/about/terms-of-use/) for additional details.
PGS000302	GRS962_DBP	Diastolic blood pressure	diastolic blood pressure	EFO_0006336	GWAS-significant (lead and secondary) variants	beta coefficient for effect size after TRAILS' correction and used as weights for the GRS. R2 threshold = 0.1	GRCh37	962	0	Beta (corrected for sample overlap)	PGP000092	32527150	10.1161/circgen.119.002775	TRUE	European:100		European:100	https://ftp.ebi.ac.uk/pub/databases/spot/pgs/scores/PGS000302/ScoringFiles/PGS000302.txt.gz	PGS obtained from the Catalog should be cited appropriately, and used in accordance with any licensing restrictions set by the authors. See EBI Terms of Use (https://www.ebi.ac.uk/about/terms-of-use/) for additional details.
PGS000303	GRS253_eGFR	Estimated glomerular filtration rate	glomerular filtration rate	EFO_0005208	GWAS-significant (lead and secondary) variants	beta coefficient for effect size after TRAILS' correction and used as weights for the GRS. R2 threshold = 0.1	GRCh37	253	0	Beta (corrected for sample overlap)	PGP000092	32527150	10.1161/circgen.119.002775	TRUE	European:100		European:100	https://ftp.ebi.ac.uk/pub/databases/spot/pgs/scores/PGS000303/ScoringFiles/PGS000303.txt.gz	PGS obtained from the Catalog should be cited appropriately, and used in accordance with any licensing restrictions set by the authors. See EBI Terms of Use (https://www.ebi.ac.uk/about/terms-of-use/) for additional details.
PGS000304	GRS43_HbA1c	HbA1c	HbA1c measurement	EFO_0004541	GWAS-significant (lead and secondary) variants	beta coefficient for effect size after TRAILS' correction and used as weights for the GRS. R2 threshold = 0.1	GRCh37	43	0	Beta (corrected for sample overlap)	PGP000092	32527150	10.1161/circgen.119.002775	TRUE	European:72.4|East Asian:15.1|African:6.2|South Asian:6.2		European:100	https://ftp.ebi.ac.uk/pub/databases/spot/pgs/scores/PGS000304/ScoringFiles/PGS000304.txt.gz	PGS obtained from the Catalog should be cited appropriately, and used in accordance with any licensing restrictions set by the authors. See EBI Terms of Use (https://www.ebi.ac.uk/about/terms-of-use/) for additional details.
PGS000305	GRS31_FG	Fasting glucose	fasting blood glucose measurement	EFO_0004465	GWAS-significant (lead and secondary) variants	beta coefficient for effect size after TRAILS' correction and used as weights for the GRS. R2 threshold = 0.1	GRCh37	31	0	Beta (corrected for sample overlap)	PGP000092	32527150	10.1161/circgen.119.002775	TRUE	European:100		European:100	https://ftp.ebi.ac.uk/pub/databases/spot/pgs/scores/PGS000305/ScoringFiles/PGS000305.txt.gz	PGS obtained from the Catalog should be cited appropriately, and used in accordance with any licensing restrictions set by the authors. See EBI Terms of Use (https://www.ebi.ac.uk/about/terms-of-use/) for additional details.
PGS000306	GRS19_FGadjBMI	Fasting glucose (body mass index adjusted)	BMI-adjusted fasting blood glucose measurement	EFO_0008036	GWAS-significant (lead and secondary) variants	beta coefficient for effect size after TRAILS' correction and used as weights for the GRS. R2 threshold = 0.1	GRCh37	19	0	Beta (corrected for sample overlap)	PGP000092	32527150	10.1161/circgen.119.002775	TRUE	European:100		European:100	https://ftp.ebi.ac.uk/pub/databases/spot/pgs/scores/PGS000306/ScoringFiles/PGS000306.txt.gz	PGS obtained from the Catalog should be cited appropriately, and used in accordance with any licensing restrictions set by the authors. See EBI Terms of Use (https://www.ebi.ac.uk/about/terms-of-use/) for additional details.
PGS000307	GRS12_FI	Fasting insulin	fasting blood insulin measurement	EFO_0004466	GWAS-significant (lead and secondary) variants	beta coefficient for effect size after TRAILS' correction and used as weights for the GRS. R2 threshold = 0.1	GRCh37	12	0	Beta (corrected for sample overlap)	PGP000092	32527150	10.1161/circgen.119.002775	TRUE	European:100		European:100	https://ftp.ebi.ac.uk/pub/databases/spot/pgs/scores/PGS000307/ScoringFiles/PGS000307.txt.gz	PGS obtained from the Catalog should be cited appropriately, and used in accordance with any licensing restrictions set by the authors. See EBI Terms of Use (https://www.ebi.ac.uk/about/terms-of-use/) for additional details.
PGS000308	GRS12_FIadjBMI	Fasting insulin (body mass index adjusted)	BMI-adjusted fasting blood insulin measurement	EFO_0008037	GWAS-significant (lead and secondary) variants	beta coefficient for effect size after TRAILS' correction and used as weights for the GRS. R2 threshold = 0.1	GRCh37	12	0	Beta (corrected for sample overlap)	PGP000092	32527150	10.1161/circgen.119.002775	TRUE	European:100		European:100	https://ftp.ebi.ac.uk/pub/databases/spot/pgs/scores/PGS000308/ScoringFiles/PGS000308.txt.gz	PGS obtained from the Catalog should be cited appropriately, and used in accordance with any licensing restrictions set by the authors. See EBI Terms of Use (https://www.ebi.ac.uk/about/terms-of-use/) for additional details.
PGS000309	GRS247_HDL	High-density lipoprotein	high density lipoprotein cholesterol measurement	EFO_0004612	GWAS-significant (lead and secondary) variants	r2 threshold = 0.1	GRCh37	247	0	Beta	PGP000092	32527150	10.1161/circgen.119.002775	TRUE	European:100		European:100	https://ftp.ebi.ac.uk/pub/databases/spot/pgs/scores/PGS000309/ScoringFiles/PGS000309.txt.gz	PGS obtained from the Catalog should be cited appropriately, and used in accordance with any licensing restrictions set by the authors. See EBI Terms of Use (https://www.ebi.ac.uk/about/terms-of-use/) for additional details.
PGS000310	GRS194_LDL	Low-density lipoprotein	low density lipoprotein cholesterol measurement	EFO_0004611	GWAS-significant (lead and secondary) variants	r2 threshold = 0.1	GRCh37	194	0	Beta	PGP000092	32527150	10.1161/circgen.119.002775	TRUE	European:100		European:100	https://ftp.ebi.ac.uk/pub/databases/spot/pgs/scores/PGS000310/ScoringFiles/PGS000310.txt.gz	PGS obtained from the Catalog should be cited appropriately, and used in accordance with any licensing restrictions set by the authors. See EBI Terms of Use (https://www.ebi.ac.uk/about/terms-of-use/) for additional details.
PGS000311	GRS234_TC	Total cholesterol	total cholesterol measurement	EFO_0004574	GWAS-significant (lead and secondary) variants	r2 threshold = 0.1	GRCh37	234	0	Beta	PGP000092	32527150	10.1161/circgen.119.002775	TRUE	European:100		European:100	https://ftp.ebi.ac.uk/pub/databases/spot/pgs/scores/PGS000311/ScoringFiles/PGS000311.txt.gz	PGS obtained from the Catalog should be cited appropriately, and used in accordance with any licensing restrictions set by the authors. See EBI Terms of Use (https://www.ebi.ac.uk/about/terms-of-use/) for additional details.
PGS000312	GRS190_TG	Triglycerides	triglyceride measurement	EFO_0004530	GWAS-significant (lead and secondary) variants	r2 threshold = 0.1	GRCh37	190	0	Beta	PGP000092	32527150	10.1161/circgen.119.002775	TRUE	European:100		European:100	https://ftp.ebi.ac.uk/pub/databases/spot/pgs/scores/PGS000312/ScoringFiles/PGS000312.txt.gz	PGS obtained from the Catalog should be cited appropriately, and used in accordance with any licensing restrictions set by the authors. See EBI Terms of Use (https://www.ebi.ac.uk/about/terms-of-use/) for additional details.
PGS000313	GRS49_Lp(a)	Lipoprotein(a)	lipoprotein A measurement	EFO_0006925	GWAS-significant (lead and secondary) variants	beta coefficient for effect size after TRAILS' correction and used as weights for the GRS. R2 threshold = 0.1	GRCh37	49	0	Beta	PGP000092	32527150	10.1161/circgen.119.002775	TRUE	European:100		European:100	https://ftp.ebi.ac.uk/pub/databases/spot/pgs/scores/PGS000313/ScoringFiles/PGS000313.txt.gz	PGS obtained from the Catalog should be cited appropriately, and used in accordance with any licensing restrictions set by the authors. See EBI Terms of Use (https://www.ebi.ac.uk/about/terms-of-use/) for additional details.
PGS000314	GRS77_CRP	C-reactive protein	C-reactive protein measurement	EFO_0004458	GWAS-significant (lead and secondary) variants	beta coefficient for effect size after TRAILS' correction and used as weights for the GRS. R2 threshold = 0.1	GRCh37	77	0	Beta (corrected for sample overlap)	PGP000092	32527150	10.1161/circgen.119.002775	TRUE	European:100		European:100	https://ftp.ebi.ac.uk/pub/databases/spot/pgs/scores/PGS000314/ScoringFiles/PGS000314.txt.gz	PGS obtained from the Catalog should be cited appropriately, and used in accordance with any licensing restrictions set by the authors. See EBI Terms of Use (https://www.ebi.ac.uk/about/terms-of-use/) for additional details.
PGS000315	GRS7_lgE	Immunoglobulin E (IgE)	serum IgE measurement	EFO_0004579	GWAS-significant (lead and secondary) variants	r2 threshold = 0.1	GRCh37	7	0	Beta	PGP000092	32527150	10.1161/circgen.119.002775	TRUE	European:100		European:100	https://ftp.ebi.ac.uk/pub/databases/spot/pgs/scores/PGS000315/ScoringFiles/PGS000315.txt.gz	PGS obtained from the Catalog should be cited appropriately, and used in accordance with any licensing restrictions set by the authors. See EBI Terms of Use (https://www.ebi.ac.uk/about/terms-of-use/) for additional details.
PGS000316	GRS42_Coeliac	Coeliac disease	celiac disease	EFO_0001060	Log‐additive GRS	Odds ratios derived by logistic regression (adjusted for 5 PCs)	NR	42	15	ln(OR)	PGP000093	32790217	10.1111/apt.15826	TRUE	European:100	European:100	Not Reported:50|European:50	https://ftp.ebi.ac.uk/pub/databases/spot/pgs/scores/PGS000316/ScoringFiles/PGS000316.txt.gz	PGS obtained from the Catalog should be cited appropriately, and used in accordance with any licensing restrictions set by the authors. See EBI Terms of Use (https://www.ebi.ac.uk/about/terms-of-use/) for additional details.
PGS000317	PRS180	Breast cancer	breast carcinoma	EFO_0000305	Likelihood ratios for genomewide-significant SNPs	p < 5e-8; risk-allele frequencies derived from the Latin American (AMR) population in 1000 Genomes; LR method described in PMID:27565998	NR	180	0	log(OR)	PGP000094	31553449	10.1093/jnci/djz174	TRUE	European:91.2|Hispanic or Latin American:8.8		Hispanic or Latin American:100	https://ftp.ebi.ac.uk/pub/databases/spot/pgs/scores/PGS000317/ScoringFiles/PGS000317.txt.gz	PGS obtained from the Catalog should be cited appropriately, and used in accordance with any licensing restrictions set by the authors. See EBI Terms of Use (https://www.ebi.ac.uk/about/terms-of-use/) for additional details.
PGS000318	cPRS_F	All-cause mortality (female)	age at death|female	EFO_0005056|PATO_0000383	Composite PRS (component scores combined by log(HR))	Weighted combination of 25 disease and risk factor PRS. Individual PRS were derived from autosomal variant associations (p < 5e-8) with LD clumping applied (r2 threshold = 0.1) to variants from the GWAS Catalog or large trait-specific GWAS.	GRCh37	4122	0	NR	PGP000095	32758451	10.1016/j.ajhg.2020.07.002	TRUE	European:91.4|Not Reported:6.2|East Asian:1.2|African:0.6|Additional Asian Ancestries:0.3|South Asian:0.3|Hispanic or Latin American:0.04	European:100	European:100	https://ftp.ebi.ac.uk/pub/databases/spot/pgs/scores/PGS000318/ScoringFiles/PGS000318.txt.gz	PGS obtained from the Catalog should be cited appropriately, and used in accordance with any licensing restrictions set by the authors. See EBI Terms of Use (https://www.ebi.ac.uk/about/terms-of-use/) for additional details.
PGS000319	cPRS_M	All-cause mortality (male)	age at death|male	EFO_0005056|PATO_0000384	Composite PRS (component scores combined by log(HR))	Weighted combination of 25 disease and risk factor PRS. Individual PRS were derived from autosomal variant associations (p < 5e-8) with LD clumping applied (r2 threshold = 0.1) to variants from the GWAS Catalog or large trait-specific GWAS.	GRCh37	4092	0	NR	PGP000095	32758451	10.1016/j.ajhg.2020.07.002	TRUE	European:91.4|Not Reported:6.2|East Asian:1.2|African:0.6|Additional Asian Ancestries:0.3|South Asian:0.3|Hispanic or Latin American:0.04	European:100	European:100	https://ftp.ebi.ac.uk/pub/databases/spot/pgs/scores/PGS000319/ScoringFiles/PGS000319.txt.gz	PGS obtained from the Catalog should be cited appropriately, and used in accordance with any licensing restrictions set by the authors. See EBI Terms of Use (https://www.ebi.ac.uk/about/terms-of-use/) for additional details.
PGS000320	PRS_BMI	Body mass index	body mass index	EFO_0004340	PRSice	p < 0.5; r2 < 0.8; MAF > 5%; INFO > 0.4	NR	263640	0	NR	PGP000096	32692746	10.1371/journal.pmed.1003196	TRUE	European:99.1|Hispanic or Latin American:0.5|African:0.4	European:100	European:100	https://ftp.ebi.ac.uk/pub/databases/spot/pgs/scores/PGS000320/ScoringFiles/PGS000320.txt.gz	PGS obtained from the Catalog should be cited appropriately, and used in accordance with any licensing restrictions set by the authors. See EBI Terms of Use (https://www.ebi.ac.uk/about/terms-of-use/) for additional details.
PGS000321	snpnet_Testosterone_combined	Serum testosterone levels	testosterone measurement	EFO_0004908	snpnet	Lasso-penalized regression (BASIL) of LD-pruned variants (plink '--indep 50 5 2') outside MHC region (chr6:25477797-36448354); MAF > 1%	GRCh37	7319	0	NR	PGP000097	32873964	10.1038/s41431-020-00712-w	TRUE		European:100	European:100	https://ftp.ebi.ac.uk/pub/databases/spot/pgs/scores/PGS000321/ScoringFiles/PGS000321.txt.gz	PGS obtained from the Catalog should be cited appropriately, and used in accordance with any licensing restrictions set by the authors. See EBI Terms of Use (https://www.ebi.ac.uk/about/terms-of-use/) for additional details.
PGS000322	snpnet_Testosterone_female-specific	Serum testosterone levels in females	testosterone measurement|female	EFO_0004908|PATO_0000383	snpnet	Lasso-penalized regression (BASIL) of LD-pruned variants (plink '--indep 50 5 2') outside MHC region (chr6:25477797-36448354); MAF > 1%	GRCh37	7168	0	NR	PGP000097	32873964	10.1038/s41431-020-00712-w	TRUE		European:100	European:100	https://ftp.ebi.ac.uk/pub/databases/spot/pgs/scores/PGS000322/ScoringFiles/PGS000322.txt.gz	PGS obtained from the Catalog should be cited appropriately, and used in accordance with any licensing restrictions set by the authors. See EBI Terms of Use (https://www.ebi.ac.uk/about/terms-of-use/) for additional details.
PGS000323	snpnet_Testosterone_male-specific	Serum testosterone levels in males	testosterone measurement|male	EFO_0004908|PATO_0000384	snpnet	Lasso-penalized regression (BASIL) of LD-pruned variants (plink '--indep 50 5 2') outside MHC region (chr6:25477797-36448354); MAF > 1%	GRCh37	8235	0	NR	PGP000097	32873964	10.1038/s41431-020-00712-w	TRUE		European:100	European:100	https://ftp.ebi.ac.uk/pub/databases/spot/pgs/scores/PGS000323/ScoringFiles/PGS000323.txt.gz	PGS obtained from the Catalog should be cited appropriately, and used in accordance with any licensing restrictions set by the authors. See EBI Terms of Use (https://www.ebi.ac.uk/about/terms-of-use/) for additional details.
PGS000324	GRS-JIA-ERA-20	Enthesitis-related Juvenile Idiophatic Arthritis	enthesitis-related juvenile idiopathic arthritis	EFO_0009732	SparSNP	Lasso penalised linear regression (10-fold cross-validation) on genotypes . SNPs were initally selected by: significance p < 5e-5, and all SNPs within 1 Mb of the former.	GRCh37	138	0	NR	PGP000052	32887683	10.1136/annrheumdis-2020-217421	TRUE		European:100	European:100	https://ftp.ebi.ac.uk/pub/databases/spot/pgs/scores/PGS000324/ScoringFiles/PGS000324.txt.gz	PGS obtained from the Catalog should be cited appropriately, and used in accordance with any licensing restrictions set by the authors. See EBI Terms of Use (https://www.ebi.ac.uk/about/terms-of-use/) for additional details.
PGS000325	GRS-JIA-Oli-20	Oligoarthritis Juvenile Idiophatic Arthritis	oligoarticular juvenile idiopathic arthritis	EFO_1002019	SparSNP	Lasso penalised linear regression (10-fold cross-validation) on genotypes . SNPs were initally selected by: significance p < 5e-5, and all SNPs within 1 Mb of the former.	GRCh37	21	0	NR	PGP000052	32887683	10.1136/annrheumdis-2020-217421	TRUE		European:100	European:100	https://ftp.ebi.ac.uk/pub/databases/spot/pgs/scores/PGS000325/ScoringFiles/PGS000325.txt.gz	PGS obtained from the Catalog should be cited appropriately, and used in accordance with any licensing restrictions set by the authors. See EBI Terms of Use (https://www.ebi.ac.uk/about/terms-of-use/) for additional details.
PGS000326	GRS-JIA-RFN-20	Rheumatoid-factor-negative Polyarthritis (Juvenile Idiophatic Arthritis)	polyarticular juvenile idiopathic arthritis, rheumatoid factor negative	EFO_1002020	SparSNP	Lasso penalised linear regression (10-fold cross-validation) on genotypes . SNPs were initally selected by: significance p < 5e-5, and all SNPs within 1 Mb of the former.	GRCh37	12	0	NR	PGP000052	32887683	10.1136/annrheumdis-2020-217421	TRUE		European:100	European:100	https://ftp.ebi.ac.uk/pub/databases/spot/pgs/scores/PGS000326/ScoringFiles/PGS000326.txt.gz	PGS obtained from the Catalog should be cited appropriately, and used in accordance with any licensing restrictions set by the authors. See EBI Terms of Use (https://www.ebi.ac.uk/about/terms-of-use/) for additional details.
PGS000327	ASD2019	Autism spectrum disorder	autism spectrum disorder	EFO_0003756	Clumping and Thresholding (C+T)	Clumping (PLINK -clump-p1 1, -clump-p2 1, -clump-r2 0.1 and -clump-kb 500); p-value threshold = 0.1; excluded the MHC-region (chr6:25–35MB); MAF > 0.05; INFO > 0.9	GRCh37	35087	0	NR	PGP000098	30804558	10.1038/s41588-019-0344-8	TRUE	European:100	European:100	European:100	https://ftp.ebi.ac.uk/pub/databases/spot/pgs/scores/PGS000327/ScoringFiles/PGS000327.txt.gz	PGS obtained from the Catalog should be cited appropriately, and used in accordance with any licensing restrictions set by the authors. See EBI Terms of Use (https://www.ebi.ac.uk/about/terms-of-use/) for additional details.
PGS000328	GRS_SLE	Systemic lupus erythematosus	systemic lupus erythematosus	EFO_0002690	Genomewide-significant variants (sourced from PMID:28509669)	p < 5e-8	NR	57	0	log(OR)	PGP000099	31826855	10.1136/annrheumdis-2019-216227	TRUE	European:100		European:100	https://ftp.ebi.ac.uk/pub/databases/spot/pgs/scores/PGS000328/ScoringFiles/PGS000328.txt.gz	PGS obtained from the Catalog should be cited appropriately, and used in accordance with any licensing restrictions set by the authors. See EBI Terms of Use (https://www.ebi.ac.uk/about/terms-of-use/) for additional details.
PGS000329	PRS_CHD	Coronary heart disease	coronary artery disease	EFO_0001645	LDpred	ρ = 0.003; LD radius = 4000; LD reference panel = 2,690 Finnish individuals [autosomal variants only]	hg19	6423165	0	NR	PGP000100	32273609	10.1038/s41591-020-0800-0	TRUE	European:100	European:100	European:100	https://ftp.ebi.ac.uk/pub/databases/spot/pgs/scores/PGS000329/ScoringFiles/PGS000329.txt.gz	PGS obtained from the Catalog should be cited appropriately, and used in accordance with any licensing restrictions set by the authors. See EBI Terms of Use (https://www.ebi.ac.uk/about/terms-of-use/) for additional details.
PGS000330	PRS_T2D	Type 2 diabetes	type 2 diabetes mellitus	MONDO_0005148	LDpred	ρ = 0.3; LD radius = 4000; LD reference panel = 2,690 Finnish individuals [autosomal variants only]	hg19	6437380	0	NR	PGP000100	32273609	10.1038/s41591-020-0800-0	TRUE	European:100	European:100	European:100	https://ftp.ebi.ac.uk/pub/databases/spot/pgs/scores/PGS000330/ScoringFiles/PGS000330.txt.gz	PGS obtained from the Catalog should be cited appropriately, and used in accordance with any licensing restrictions set by the authors. See EBI Terms of Use (https://www.ebi.ac.uk/about/terms-of-use/) for additional details.
PGS000331	PRS_AF	Atrial fibrillation	atrial fibrillation	EFO_0000275	LDpred	ρ = 0.03; LD radius = 4000; LD reference panel = 2,690 Finnish individuals [autosomal variants only]	hg19	6183494	0	NR	PGP000100	32273609	10.1038/s41591-020-0800-0	TRUE	European:100	European:100	European:100	https://ftp.ebi.ac.uk/pub/databases/spot/pgs/scores/PGS000331/ScoringFiles/PGS000331.txt.gz	PGS obtained from the Catalog should be cited appropriately, and used in accordance with any licensing restrictions set by the authors. See EBI Terms of Use (https://www.ebi.ac.uk/about/terms-of-use/) for additional details.
PGS000332	PRS_BC	Breast cancer	breast carcinoma	EFO_0000305	LDpred	ρ = 0.03; LD radius = 4000; LD reference panel = 2,690 Finnish individuals [autosomal variants only]	hg19	6390808	0	NR	PGP000100	32273609	10.1038/s41591-020-0800-0	TRUE	European:100	European:100	European:100	https://ftp.ebi.ac.uk/pub/databases/spot/pgs/scores/PGS000332/ScoringFiles/PGS000332.txt.gz	PGS obtained from the Catalog should be cited appropriately, and used in accordance with any licensing restrictions set by the authors. See EBI Terms of Use (https://www.ebi.ac.uk/about/terms-of-use/) for additional details.
PGS000333	PRS_PC	Prostate cancer	prostate carcinoma	EFO_0001663	LDpred	ρ = 0.01; LD radius = 4000; LD reference panel = 2,690 Finnish individuals [autosomal variants only]	hg19	6606785	0	NR	PGP000100	32273609	10.1038/s41591-020-0800-0	TRUE	European:100	European:100	European:100	https://ftp.ebi.ac.uk/pub/databases/spot/pgs/scores/PGS000333/ScoringFiles/PGS000333.txt.gz	PGS obtained from the Catalog should be cited appropriately, and used in accordance with any licensing restrictions set by the authors. See EBI Terms of Use (https://www.ebi.ac.uk/about/terms-of-use/) for additional details.
PGS000334	GRSfull_22	Late-onset Alzheimer’s disease	late-onset Alzheimers disease	EFO_1001870	Clumping + Thresholding	p < 1e-8; r2 threshold = 0.01; HapMap3 SNPs (MAF > 0.01)	GRCh37	22	0	NR	PGP000101	32968074	10.1038/s41467-020-18534-1	TRUE	European:80.9|Not Reported:19.1		European:100	https://ftp.ebi.ac.uk/pub/databases/spot/pgs/scores/PGS000334/ScoringFiles/PGS000334.txt.gz	PGS obtained from the Catalog should be cited appropriately, and used in accordance with any licensing restrictions set by the authors. See EBI Terms of Use (https://www.ebi.ac.uk/about/terms-of-use/) for additional details.
PGS000335	BC_PRSCS	Breast cancer	breast carcinoma	EFO_0000305	PRS-CS	PRS-CS-auto, 1000G European sample (N = 503) as the external LD reference panel	GRCh38	1079089	0	NR	PGP000102	33318493	10.1038/s41467-020-19966-5	TRUE	European:100		European:100	https://ftp.ebi.ac.uk/pub/databases/spot/pgs/scores/PGS000335/ScoringFiles/PGS000335.txt.gz	PGS obtained from the Catalog should be cited appropriately, and used in accordance with any licensing restrictions set by the authors. See EBI Terms of Use (https://www.ebi.ac.uk/about/terms-of-use/) for additional details.
PGS000336	GRS313_Chron	Chronotype	chronotype measurement	EFO_0008328	Genome-wide significant SNPs		GRCh37	313	0	ln(OR)	PGP000103	32579418	10.1177/0748730420935328	TRUE	European:100		European:100	https://ftp.ebi.ac.uk/pub/databases/spot/pgs/scores/PGS000336/ScoringFiles/PGS000336.txt.gz	PGS obtained from the Catalog should be cited appropriately, and used in accordance with any licensing restrictions set by the authors. See EBI Terms of Use (https://www.ebi.ac.uk/about/terms-of-use/) for additional details.
PGS000337	MetaPRS_CAD	Coronary artery disease	coronary artery disease	EFO_0001645	P-value thresholding	p < 5e-2, r2 < 0.8	hg19	75028	0	NR	PGP000104	33020668	10.1038/s41588-020-0705-3	TRUE	Not Reported:45.5|East Asian:27.5|European:21.6|South Asian:3.9|Hispanic or Latin American:0.6|African:0.5|Greater Middle Eastern:0.3		East Asian:100	https://ftp.ebi.ac.uk/pub/databases/spot/pgs/scores/PGS000337/ScoringFiles/PGS000337.txt.gz	The use of data is limited for research purposes only. Identification of individuals is prohibited. The hum0014-v20 accession number should be cited in public publications and presentations.
PGS000338	GRS97_AF	Atrial fibrillation	atrial fibrillation	EFO_0000275	Genome-wide significant SNPs	p < 1e-8, INFO score > 0.4, Hardy-Weinberg equilibrium p > 1e-6	hg19	97	0	NR	PGP000105	31919934	10.1002/ejhf.1735	TRUE	European:91.4|East Asian:6.3|African:1.5|Hispanic or Latin American:0.9		European:100	https://ftp.ebi.ac.uk/pub/databases/spot/pgs/scores/PGS000338/ScoringFiles/PGS000338.txt.gz	PGS obtained from the Catalog should be cited appropriately, and used in accordance with any licensing restrictions set by the authors. See EBI Terms of Use (https://www.ebi.ac.uk/about/terms-of-use/) for additional details.
PGS000339	PRS22_CM	Cutaneous melanoma	cutaneous melanoma	EFO_0000389	Clumping + Thresholding	p <5e-6, LD reference panel = 5000 UK Biobank participants, LD r2 thresholds = 0.5 and 0.025	hg19	22	0	log(OR)	PGP000106	32716505	10.1093/hmg/ddaa156	TRUE	European:100	European:100	European:100	https://ftp.ebi.ac.uk/pub/databases/spot/pgs/scores/PGS000339/ScoringFiles/PGS000339.txt.gz	PGS obtained from the Catalog should be cited appropriately, and used in accordance with any licensing restrictions set by the authors. See EBI Terms of Use (https://www.ebi.ac.uk/about/terms-of-use/) for additional details.
PGS000340	LDL-Cpsp	Low-density lipoprotein cholesterol levels	low density lipoprotein cholesterol measurement	EFO_0004611	Genome-wide significant variants	Independent SNVs	GRCh37	28	0	beta	PGP000107	33079599	10.1161/circgen.120.002919	TRUE	European:100		European:50|Multi-ancestry (including European):50	https://ftp.ebi.ac.uk/pub/databases/spot/pgs/scores/PGS000340/ScoringFiles/PGS000340.txt.gz	PGS obtained from the Catalog should be cited appropriately, and used in accordance with any licensing restrictions set by the authors. See EBI Terms of Use (https://www.ebi.ac.uk/about/terms-of-use/) for additional details.
PGS000341	GRS33_SSc	Systemic sclerosis	systemic scleroderma	EFO_0000717	LD Clumping, PRSice-2	R^2=0.13, p=1.27e-17	GRCh37	33	0	log(OR)	PGP000110	33004331	10.1136/annrheumdis-2020-218558	TRUE	European:100	European:100	European:100	https://ftp.ebi.ac.uk/pub/databases/spot/pgs/scores/PGS000341/ScoringFiles/PGS000341.txt.gz	PGS obtained from the Catalog should be cited appropriately, and used in accordance with any licensing restrictions set by the authors. See EBI Terms of Use (https://www.ebi.ac.uk/about/terms-of-use/) for additional details.
PGS000342	wGRS_PsA	Psoriatic arthritis	psoriatic arthritis	EFO_0003778	GWAS-significant variants, HLA-specific significant variants.	SNPs within candidate risk genes shown to be associated with Psoriasis only (PsO) or Psoriatic Arthritis (PsA) in large cohorts or genome-wide association studies.	hg19	11	0	log(OR)	PGP000111	32462110	10.1177/2475530320910814	TRUE	European:100|Not Reported:0		Not Reported:100	https://ftp.ebi.ac.uk/pub/databases/spot/pgs/scores/PGS000342/ScoringFiles/PGS000342.txt.gz	PGS obtained from the Catalog should be cited appropriately, and used in accordance with any licensing restrictions set by the authors. See EBI Terms of Use (https://www.ebi.ac.uk/about/terms-of-use/) for additional details.
PGS000343	wGRS_PsA_HLA	Psoriatic arthritis	psoriatic arthritis	EFO_0003778	HLA-specific significant variants.	SNPs within candidate risk genes shown to be associated with Psoriasis only (PsO) or Psoriatic Arthritis (PsA) in large cohorts.	hg19	5	0	log(OR)	PGP000111	32462110	10.1177/2475530320910814	TRUE	Not Reported:100		Not Reported:100	https://ftp.ebi.ac.uk/pub/databases/spot/pgs/scores/PGS000343/ScoringFiles/PGS000343.txt.gz	PGS obtained from the Catalog should be cited appropriately, and used in accordance with any licensing restrictions set by the authors. See EBI Terms of Use (https://www.ebi.ac.uk/about/terms-of-use/) for additional details.
PGS000344	PRS287_BC	Breast cancer	breast carcinoma	EFO_0000305	313 variants from Mavaddatt et al (PGS000004)	p < 10e5, Imputation accuracy > 0.9 in MyBrCa and SGBCC studies	GRCh37	287	0	beta	PGP000112	32737321	10.1038/s41467-020-17680-w	TRUE	European:100	European:100	Additional Asian Ancestries:66.7|Multi-ancestry (excluding European):33.3	https://ftp.ebi.ac.uk/pub/databases/spot/pgs/scores/PGS000344/ScoringFiles/PGS000344.txt.gz	PGS obtained from the Catalog should be cited appropriately, and used in accordance with any licensing restrictions set by the authors. See EBI Terms of Use (https://www.ebi.ac.uk/about/terms-of-use/) for additional details.
PGS000345	PRS229_BC	Breast cancer	breast carcinoma	EFO_0000305	313 variants from Mavaddatt et al (PGS000004)	p < 10e5, Imputation accuracy >0.9 in MyBrCa and SGBCC studies, polymorphic variants	GRCh37	229	0	beta	PGP000112	32737321	10.1038/s41467-020-17680-w	TRUE	European:100	European:100	Additional Asian Ancestries:66.7|East Asian:33.3	https://ftp.ebi.ac.uk/pub/databases/spot/pgs/scores/PGS000345/ScoringFiles/PGS000345.txt.gz	PGS obtained from the Catalog should be cited appropriately, and used in accordance with any licensing restrictions set by the authors. See EBI Terms of Use (https://www.ebi.ac.uk/about/terms-of-use/) for additional details.
PGS000346	PRS287_ERneg	Estrogen receptor negative breast cancer	estrogen-receptor negative breast cancer	EFO_1000650	313 variants from Mavaddatt et al (PGS000006)	p < 10e5, Imputation accuracy > 0.9 in MyBrCa and SGBCC studies	GRCh37	287	0	beta	PGP000112	32737321	10.1038/s41467-020-17680-w	TRUE	European:100	European:100	Additional Asian Ancestries:66.7|Multi-ancestry (excluding European):33.3	https://ftp.ebi.ac.uk/pub/databases/spot/pgs/scores/PGS000346/ScoringFiles/PGS000346.txt.gz	PGS obtained from the Catalog should be cited appropriately, and used in accordance with any licensing restrictions set by the authors. See EBI Terms of Use (https://www.ebi.ac.uk/about/terms-of-use/) for additional details.
PGS000347	PRS287_ERpos	Estrogen receptor positive breast cancer	estrogen-receptor positive breast cancer	EFO_1000649	313 variants from Mavaddatt et al (PGS000005)	p < 10e5, Imputation accuracy > 0.9 in MyBrCa and SGBCC studies	GRCh37	287	0	beta	PGP000112	32737321	10.1038/s41467-020-17680-w	TRUE	European:100	European:100	Additional Asian Ancestries:66.7|Multi-ancestry (excluding European):33.3	https://ftp.ebi.ac.uk/pub/databases/spot/pgs/scores/PGS000347/ScoringFiles/PGS000347.txt.gz	PGS obtained from the Catalog should be cited appropriately, and used in accordance with any licensing restrictions set by the authors. See EBI Terms of Use (https://www.ebi.ac.uk/about/terms-of-use/) for additional details.
PGS000348	PRS_PrCa	Prostate cancer	prostate carcinoma	EFO_0001663	GWAS-significant variants	Risk was normalized to population average (see Methods 2.3). Includes proxy variants	GRCh37	72	0	log(OR)	PGP000113	33258481	10.1002/pros.24058	TRUE	European:88.9|African:4.9|East Asian:3.9|Hispanic or Latin American:2.2		European:100	https://ftp.ebi.ac.uk/pub/databases/spot/pgs/scores/PGS000348/ScoringFiles/PGS000348.txt.gz	Creative Commons Attribution-NonCommercial-NoDerivatives 4.0 International (CC BY-NC-ND 4.0). © 2020 Ambry Genetics.
PGS000349	PRS70_CAD	Coronary artery disease	coronary artery disease	EFO_0001645	Genomewide-significant SNPs	p < 5e-8	GRCh37	70	0	log(HR)	PGP000114	32912153	10.1186/s12881-020-01113-y	TRUE	European:59.2|Multi-ancestry (including European):33|South Asian:4.3|East Asian:1.9|Hispanic or Latin American:0.7|African:0.5|Greater Middle Eastern:0.4		European:100	https://ftp.ebi.ac.uk/pub/databases/spot/pgs/scores/PGS000349/ScoringFiles/PGS000349.txt.gz	PGS obtained from the Catalog should be cited appropriately, and used in accordance with any licensing restrictions set by the authors. See EBI Terms of Use (https://www.ebi.ac.uk/about/terms-of-use/) for additional details.
PGS000350	GRS12_POAG	Primary open-angle glaucoma	open-angle glaucoma	EFO_0004190	GWAS-significant variants	Lead SNPs from loci previously associated with primary open-angle glaucoma	NR	12	0	unweighted	PGP000115	31436842	10.1001/jamaophthalmol.2019.3109	TRUE	European:93.7|Multi-ancestry (excluding European):6.3		European:100	https://ftp.ebi.ac.uk/pub/databases/spot/pgs/scores/PGS000350/ScoringFiles/PGS000350.txt.gz	PGS obtained from the Catalog should be cited appropriately, and used in accordance with any licensing restrictions set by the authors. See EBI Terms of Use (https://www.ebi.ac.uk/about/terms-of-use/) for additional details.
PGS000351	PRS_EOC	Invasive epithelial ovarian cancer	ovarian carcinoma	EFO_0001075	Genome-wide significant SNPs		GRCh37	30	0	log(OR)	PGP000117	32665703	10.1038/s41436-020-0862-x	TRUE	European:100		European:100	https://ftp.ebi.ac.uk/pub/databases/spot/pgs/scores/PGS000351/ScoringFiles/PGS000351.txt.gz	PGS obtained from the Catalog should be cited appropriately, and used in accordance with any licensing restrictions set by the authors. See EBI Terms of Use (https://www.ebi.ac.uk/about/terms-of-use/) for additional details.
PGS000352	PRS_HGS	High grade serous ovarian cancer	high grade ovarian serous adenocarcinoma	EFO_1001958	Genome-wide significant SNPs	p<5e-8	GRCh37	22	0	log(OR)	PGP000117	32665703	10.1038/s41436-020-0862-x	TRUE	European:100		European:100	https://ftp.ebi.ac.uk/pub/databases/spot/pgs/scores/PGS000352/ScoringFiles/PGS000352.txt.gz	PGS obtained from the Catalog should be cited appropriately, and used in accordance with any licensing restrictions set by the authors. See EBI Terms of Use (https://www.ebi.ac.uk/about/terms-of-use/) for additional details.
PGS000353	PRSWEB_PHECODE10001_UKBB-SAIGE-HRC-X10001_P_5e-08_MGI_20200608	Any Cancer	cancer	EFO_0000311	GWAS Hits	LD Clumping (MAF >= 1%, r^2 <= 0.1) & P<=5e-08	GRCh37	14	0	NR	PGP000118	32991828	10.1016/j.ajhg.2020.08.025	TRUE	European:100	European:100	European:100	https://ftp.ebi.ac.uk/pub/databases/spot/pgs/scores/PGS000353/ScoringFiles/PGS000353.txt.gz	PGS obtained from the Catalog should be cited appropriately, and used in accordance with any licensing restrictions set by the authors. See EBI Terms of Use (https://www.ebi.ac.uk/about/terms-of-use/) for additional details.
PGS000354	PRSWEB_PHECODE10001_UKBB-SAIGE-HRC-X10001_PRS-CS_MGI_20200608	Any Cancer	cancer	EFO_0000311	PRS-CS	Parameters = auto; LD reference (eur)	GRCh37	1118667	0	NR	PGP000118	32991828	10.1016/j.ajhg.2020.08.025	TRUE	European:100	European:100	European:100	https://ftp.ebi.ac.uk/pub/databases/spot/pgs/scores/PGS000354/ScoringFiles/PGS000354.txt.gz	PGS obtained from the Catalog should be cited appropriately, and used in accordance with any licensing restrictions set by the authors. See EBI Terms of Use (https://www.ebi.ac.uk/about/terms-of-use/) for additional details.
PGS000355	PRSWEB_PHECODE10001_UKBB-SAIGE-HRC-X10001_PT_MGI_20200608	Any Cancer	cancer	EFO_0000311	P&T	LD Clumping (MAF >= 1%, r^2 <= 0.1) & P<=1e-07	GRCh37	15	0	NR	PGP000118	32991828	10.1016/j.ajhg.2020.08.025	TRUE	European:100	European:100	European:100	https://ftp.ebi.ac.uk/pub/databases/spot/pgs/scores/PGS000355/ScoringFiles/PGS000355.txt.gz	PGS obtained from the Catalog should be cited appropriately, and used in accordance with any licensing restrictions set by the authors. See EBI Terms of Use (https://www.ebi.ac.uk/about/terms-of-use/) for additional details.
PGS000356	PRSWEB_PHECODE10001_UKBB-SAIGE-HRC-X10001_LASSOSUM_MGI_20200608	Any Cancer	cancer	EFO_0000311	Lassosum	s=0.2;Lambda=0.008859	GRCh37	179	0	NR	PGP000118	32991828	10.1016/j.ajhg.2020.08.025	TRUE	European:100	European:100	European:100	https://ftp.ebi.ac.uk/pub/databases/spot/pgs/scores/PGS000356/ScoringFiles/PGS000356.txt.gz	PGS obtained from the Catalog should be cited appropriately, and used in accordance with any licensing restrictions set by the authors. See EBI Terms of Use (https://www.ebi.ac.uk/about/terms-of-use/) for additional details.
PGS000357	PRSWEB_PHECODE145_C3-LIP-ORAL-PHARYNX_PT_MGI_20200608	Cancer of mouth	oral cavity cancer	EFO_0005570	P&T	LD Clumping (MAF >= 1%, r^2 <= 0.1) & P<=2e-05	GRCh37	45	0	NR	PGP000118	32991828	10.1016/j.ajhg.2020.08.025	TRUE	European:100	European:100	European:100	https://ftp.ebi.ac.uk/pub/databases/spot/pgs/scores/PGS000357/ScoringFiles/PGS000357.txt.gz	PGS obtained from the Catalog should be cited appropriately, and used in accordance with any licensing restrictions set by the authors. See EBI Terms of Use (https://www.ebi.ac.uk/about/terms-of-use/) for additional details.
PGS000358	PRSWEB_PHECODE145_UKBB-SAIGE-HRC-X145_PRS-CS_MGI_20200608	Cancer of mouth	oral cavity cancer	EFO_0005570	PRS-CS	Parameters = auto; LD reference (eur)	GRCh37	1119238	0	NR	PGP000118	32991828	10.1016/j.ajhg.2020.08.025	TRUE	European:100	European:100	European:100	https://ftp.ebi.ac.uk/pub/databases/spot/pgs/scores/PGS000358/ScoringFiles/PGS000358.txt.gz	PGS obtained from the Catalog should be cited appropriately, and used in accordance with any licensing restrictions set by the authors. See EBI Terms of Use (https://www.ebi.ac.uk/about/terms-of-use/) for additional details.
PGS000359	PRSWEB_PHECODE145.2_C3-TONGUENAS_PRS-CS_MGI_20200608	Cancer of tongue	tongue neoplasm	EFO_0003871	PRS-CS	Parameters = auto; LD reference (eur)	GRCh37	931954	0	NR	PGP000118	32991828	10.1016/j.ajhg.2020.08.025	TRUE	European:100	European:100	European:100	https://ftp.ebi.ac.uk/pub/databases/spot/pgs/scores/PGS000359/ScoringFiles/PGS000359.txt.gz	PGS obtained from the Catalog should be cited appropriately, and used in accordance with any licensing restrictions set by the authors. See EBI Terms of Use (https://www.ebi.ac.uk/about/terms-of-use/) for additional details.
PGS000360	PRSWEB_PHECODE149.4_C32_LASSOSUM_MGI_20200608	Cancer of larynx	Malignant Laryngeal Neoplasm	EFO_1000354	Lassosum	s=0.9;Lambda=0.1	GRCh37	25920	0	NR	PGP000118	32991828	10.1016/j.ajhg.2020.08.025	TRUE	European:100	European:100	European:100	https://ftp.ebi.ac.uk/pub/databases/spot/pgs/scores/PGS000360/ScoringFiles/PGS000360.txt.gz	PGS obtained from the Catalog should be cited appropriately, and used in accordance with any licensing restrictions set by the authors. See EBI Terms of Use (https://www.ebi.ac.uk/about/terms-of-use/) for additional details.
PGS000361	PRSWEB_PHECODE149.4_C3-LARYNX_LASSOSUM_MGI_20200608	Cancer of larynx	Malignant Laryngeal Neoplasm	EFO_1000354	Lassosum	s=1;Lambda=0.07848	GRCh37	87893	0	NR	PGP000118	32991828	10.1016/j.ajhg.2020.08.025	TRUE	European:100	European:100	European:100	https://ftp.ebi.ac.uk/pub/databases/spot/pgs/scores/PGS000361/ScoringFiles/PGS000361.txt.gz	PGS obtained from the Catalog should be cited appropriately, and used in accordance with any licensing restrictions set by the authors. See EBI Terms of Use (https://www.ebi.ac.uk/about/terms-of-use/) for additional details.
PGS000362	PRSWEB_PHECODE149.4_UKBB-SAIGE-HRC-X149.4_PT_MGI_20200608	Cancer of larynx	Malignant Laryngeal Neoplasm	EFO_1000354	P&T	LD Clumping (MAF >= 1%, r^2 <= 0.1) & P<=3.98e-05	GRCh37	53	0	NR	PGP000118	32991828	10.1016/j.ajhg.2020.08.025	TRUE	European:100	European:100	European:100	https://ftp.ebi.ac.uk/pub/databases/spot/pgs/scores/PGS000362/ScoringFiles/PGS000362.txt.gz	PGS obtained from the Catalog should be cited appropriately, and used in accordance with any licensing restrictions set by the authors. See EBI Terms of Use (https://www.ebi.ac.uk/about/terms-of-use/) for additional details.
PGS000363	PRSWEB_PHECODE150_C15_PRS-CS_MGI_20200608	Cancer of esophagus	esophageal cancer	MONDO_0007576	PRS-CS	Parameters = auto; LD reference (eur)	GRCh37	1081646	0	NR	PGP000118	32991828	10.1016/j.ajhg.2020.08.025	TRUE	European:100	European:100	European:100	https://ftp.ebi.ac.uk/pub/databases/spot/pgs/scores/PGS000363/ScoringFiles/PGS000363.txt.gz	PGS obtained from the Catalog should be cited appropriately, and used in accordance with any licensing restrictions set by the authors. See EBI Terms of Use (https://www.ebi.ac.uk/about/terms-of-use/) for additional details.
PGS000364	PRSWEB_PHECODE150_C15_LASSOSUM_MGI_20200608	Cancer of esophagus	esophageal cancer	MONDO_0007576	Lassosum	s=1;Lambda=0.07848	GRCh37	2001	0	NR	PGP000118	32991828	10.1016/j.ajhg.2020.08.025	TRUE	European:100	European:100	European:100	https://ftp.ebi.ac.uk/pub/databases/spot/pgs/scores/PGS000364/ScoringFiles/PGS000364.txt.gz	PGS obtained from the Catalog should be cited appropriately, and used in accordance with any licensing restrictions set by the authors. See EBI Terms of Use (https://www.ebi.ac.uk/about/terms-of-use/) for additional details.
PGS000365	PRSWEB_PHECODE150_C3-OESOPHAGUS_PRS-CS_MGI_20200608	Cancer of esophagus	esophageal cancer	MONDO_0007576	PRS-CS	Parameters = auto; LD reference (eur)	GRCh37	1070434	0	NR	PGP000118	32991828	10.1016/j.ajhg.2020.08.025	TRUE	European:100	European:100	European:100	https://ftp.ebi.ac.uk/pub/databases/spot/pgs/scores/PGS000365/ScoringFiles/PGS000365.txt.gz	PGS obtained from the Catalog should be cited appropriately, and used in accordance with any licensing restrictions set by the authors. See EBI Terms of Use (https://www.ebi.ac.uk/about/terms-of-use/) for additional details.
PGS000366	PRSWEB_PHECODE150_UKBB-SAIGE-HRC-X150_PRS-CS_MGI_20200608	Cancer of esophagus	esophageal cancer	MONDO_0007576	PRS-CS	Parameters = auto; LD reference (eur)	GRCh37	1119238	0	NR	PGP000118	32991828	10.1016/j.ajhg.2020.08.025	TRUE	European:100	European:100	European:100	https://ftp.ebi.ac.uk/pub/databases/spot/pgs/scores/PGS000366/ScoringFiles/PGS000366.txt.gz	PGS obtained from the Catalog should be cited appropriately, and used in accordance with any licensing restrictions set by the authors. See EBI Terms of Use (https://www.ebi.ac.uk/about/terms-of-use/) for additional details.
PGS000367	PRSWEB_PHECODE153_CRC-Huyghe_P_5e-08_MGI_20200608	Colorectal cancer	colorectal cancer	EFO_0005842	GWAS Hits	LD Clumping (MAF >= 1%, r^2 <= 0.1) & P<=5e-08	GRCh37	74	0	NR	PGP000118	32991828	10.1016/j.ajhg.2020.08.025	TRUE	European:100	European:100	European:100	https://ftp.ebi.ac.uk/pub/databases/spot/pgs/scores/PGS000367/ScoringFiles/PGS000367.txt.gz	PGS obtained from the Catalog should be cited appropriately, and used in accordance with any licensing restrictions set by the authors. See EBI Terms of Use (https://www.ebi.ac.uk/about/terms-of-use/) for additional details.
PGS000368	PRSWEB_PHECODE153_CRC-Huyghe_P_5e-08_UKB_20200608	Colorectal cancer	colorectal cancer	EFO_0005842	GWAS Hits	LD Clumping (MAF >= 1%, r^2 <= 0.1) & P<=5e-08	GRCh37	74	0	NR	PGP000118	32991828	10.1016/j.ajhg.2020.08.025	TRUE	European:100	European:100	European:100	https://ftp.ebi.ac.uk/pub/databases/spot/pgs/scores/PGS000368/ScoringFiles/PGS000368.txt.gz	PGS obtained from the Catalog should be cited appropriately, and used in accordance with any licensing restrictions set by the authors. See EBI Terms of Use (https://www.ebi.ac.uk/about/terms-of-use/) for additional details.
PGS000369	PRSWEB_PHECODE153_CRC-Huyghe_PT_MGI_20200608	Colorectal cancer	colorectal cancer	EFO_0005842	P&T	LD Clumping (MAF >= 1%, r^2 <= 0.1) & P<=3.98e-07	GRCh37	81	0	NR	PGP000118	32991828	10.1016/j.ajhg.2020.08.025	TRUE	European:100	European:100	European:100	https://ftp.ebi.ac.uk/pub/databases/spot/pgs/scores/PGS000369/ScoringFiles/PGS000369.txt.gz	PGS obtained from the Catalog should be cited appropriately, and used in accordance with any licensing restrictions set by the authors. See EBI Terms of Use (https://www.ebi.ac.uk/about/terms-of-use/) for additional details.
PGS000370	PRSWEB_PHECODE153_CRC-Huyghe_PT_UKB_20200608	Colorectal cancer	colorectal cancer	EFO_0005842	P&T	LD Clumping (MAF >= 1%, r^2 <= 0.1) & P<=7.8e-06	GRCh37	87	0	NR	PGP000118	32991828	10.1016/j.ajhg.2020.08.025	TRUE	European:100	European:100	European:100	https://ftp.ebi.ac.uk/pub/databases/spot/pgs/scores/PGS000370/ScoringFiles/PGS000370.txt.gz	PGS obtained from the Catalog should be cited appropriately, and used in accordance with any licensing restrictions set by the authors. See EBI Terms of Use (https://www.ebi.ac.uk/about/terms-of-use/) for additional details.
PGS000371	PRSWEB_PHECODE153_GWAS-Catalog-r2019-05-03-X153_P_5e-08_UKB_20200608	Colorectal cancer	colorectal cancer	EFO_0005842	GWAS Hits	LD Clumping (MAF >= 1%, r^2 <= 0.1) & P<=5e-08	GRCh37	18	0	NR	PGP000118	32991828	10.1016/j.ajhg.2020.08.025	TRUE	European:100	European:100	European:100	https://ftp.ebi.ac.uk/pub/databases/spot/pgs/scores/PGS000371/ScoringFiles/PGS000371.txt.gz	PGS obtained from the Catalog should be cited appropriately, and used in accordance with any licensing restrictions set by the authors. See EBI Terms of Use (https://www.ebi.ac.uk/about/terms-of-use/) for additional details.
PGS000372	PRSWEB_PHECODE153_GWAS-Catalog-r2019-05-03-X153_PT_UKB_20200608	Colorectal cancer	colorectal cancer	EFO_0005842	P&T	LD Clumping (MAF >= 1%, r^2 <= 0.1) & P<=7e-06	GRCh37	27	0	NR	PGP000118	32991828	10.1016/j.ajhg.2020.08.025	TRUE	European:100	European:100	European:100	https://ftp.ebi.ac.uk/pub/databases/spot/pgs/scores/PGS000372/ScoringFiles/PGS000372.txt.gz	PGS obtained from the Catalog should be cited appropriately, and used in accordance with any licensing restrictions set by the authors. See EBI Terms of Use (https://www.ebi.ac.uk/about/terms-of-use/) for additional details.
PGS000373	PRSWEB_PHECODE153_UKBB-SAIGE-HRC-X153_PRS-CS_MGI_20200608	Colorectal cancer	colorectal cancer	EFO_0005842	PRS-CS	Parameters = auto; LD reference (eur)	GRCh37	1119238	0	NR	PGP000118	32991828	10.1016/j.ajhg.2020.08.025	TRUE	European:100	European:100	European:100	https://ftp.ebi.ac.uk/pub/databases/spot/pgs/scores/PGS000373/ScoringFiles/PGS000373.txt.gz	PGS obtained from the Catalog should be cited appropriately, and used in accordance with any licensing restrictions set by the authors. See EBI Terms of Use (https://www.ebi.ac.uk/about/terms-of-use/) for additional details.
PGS000374	PRSWEB_PHECODE153_UKBB-SAIGE-HRC-X153_PT_MGI_20200608	Colorectal cancer	colorectal cancer	EFO_0005842	P&T	LD Clumping (MAF >= 1%, r^2 <= 0.1) & P<=7.94e-06	GRCh37	41	0	NR	PGP000118	32991828	10.1016/j.ajhg.2020.08.025	TRUE	European:100	European:100	European:100	https://ftp.ebi.ac.uk/pub/databases/spot/pgs/scores/PGS000374/ScoringFiles/PGS000374.txt.gz	PGS obtained from the Catalog should be cited appropriately, and used in accordance with any licensing restrictions set by the authors. See EBI Terms of Use (https://www.ebi.ac.uk/about/terms-of-use/) for additional details.
PGS000375	PRSWEB_PHECODE153_UKBB-SAIGE-HRC-X153_LASSOSUM_MGI_20200608	Colorectal cancer	colorectal cancer	EFO_0005842	Lassosum	s=0.5;Lambda=0.02976	GRCh37	370	0	NR	PGP000118	32991828	10.1016/j.ajhg.2020.08.025	TRUE	European:100	European:100	European:100	https://ftp.ebi.ac.uk/pub/databases/spot/pgs/scores/PGS000375/ScoringFiles/PGS000375.txt.gz	PGS obtained from the Catalog should be cited appropriately, and used in accordance with any licensing restrictions set by the authors. See EBI Terms of Use (https://www.ebi.ac.uk/about/terms-of-use/) for additional details.
PGS000376	PRSWEB_PHECODE153.2_C18_PRS-CS_MGI_20200608	Colon cancer	colon carcinoma	EFO_1001950	PRS-CS	Parameters = auto; LD reference (eur)	GRCh37	1111490	0	NR	PGP000118	32991828	10.1016/j.ajhg.2020.08.025	TRUE	European:100	European:100	European:100	https://ftp.ebi.ac.uk/pub/databases/spot/pgs/scores/PGS000376/ScoringFiles/PGS000376.txt.gz	PGS obtained from the Catalog should be cited appropriately, and used in accordance with any licensing restrictions set by the authors. See EBI Terms of Use (https://www.ebi.ac.uk/about/terms-of-use/) for additional details.
PGS000377	PRSWEB_PHECODE153.2_C18_LASSOSUM_MGI_20200608	Colon cancer	colon carcinoma	EFO_1001950	Lassosum	s=1;Lambda=0.001	GRCh37	5740814	0	NR	PGP000118	32991828	10.1016/j.ajhg.2020.08.025	TRUE	European:100	European:100	European:100	https://ftp.ebi.ac.uk/pub/databases/spot/pgs/scores/PGS000377/ScoringFiles/PGS000377.txt.gz	PGS obtained from the Catalog should be cited appropriately, and used in accordance with any licensing restrictions set by the authors. See EBI Terms of Use (https://www.ebi.ac.uk/about/terms-of-use/) for additional details.
PGS000378	PRSWEB_PHECODE153.2_C3-COLON_PRS-CS_MGI_20200608	Colon cancer	colon carcinoma	EFO_1001950	PRS-CS	Parameters = auto; LD reference (eur)	GRCh37	1111399	0	NR	PGP000118	32991828	10.1016/j.ajhg.2020.08.025	TRUE	European:100	European:100	European:100	https://ftp.ebi.ac.uk/pub/databases/spot/pgs/scores/PGS000378/ScoringFiles/PGS000378.txt.gz	PGS obtained from the Catalog should be cited appropriately, and used in accordance with any licensing restrictions set by the authors. See EBI Terms of Use (https://www.ebi.ac.uk/about/terms-of-use/) for additional details.
PGS000379	PRSWEB_PHECODE153.2_C3-COLON_LASSOSUM_MGI_20200608	Colon cancer	colon carcinoma	EFO_1001950	Lassosum	s=1;Lambda=0.001	GRCh37	5715093	0	NR	PGP000118	32991828	10.1016/j.ajhg.2020.08.025	TRUE	European:100	European:100	European:100	https://ftp.ebi.ac.uk/pub/databases/spot/pgs/scores/PGS000379/ScoringFiles/PGS000379.txt.gz	PGS obtained from the Catalog should be cited appropriately, and used in accordance with any licensing restrictions set by the authors. See EBI Terms of Use (https://www.ebi.ac.uk/about/terms-of-use/) for additional details.
PGS000380	PRSWEB_PHECODE153.2_UKBB-SAIGE-HRC-X153.2_PRS-CS_MGI_20200608	Colon cancer	colon carcinoma	EFO_1001950	PRS-CS	Parameters = auto; LD reference (eur)	GRCh37	1119238	0	NR	PGP000118	32991828	10.1016/j.ajhg.2020.08.025	TRUE	European:100	European:100	European:100	https://ftp.ebi.ac.uk/pub/databases/spot/pgs/scores/PGS000380/ScoringFiles/PGS000380.txt.gz	PGS obtained from the Catalog should be cited appropriately, and used in accordance with any licensing restrictions set by the authors. See EBI Terms of Use (https://www.ebi.ac.uk/about/terms-of-use/) for additional details.
PGS000381	PRSWEB_PHECODE153.2_UKBB-SAIGE-HRC-X153.2_PT_MGI_20200608	Colon cancer	colon carcinoma	EFO_1001950	P&T	LD Clumping (MAF >= 1%, r^2 <= 0.1) & P<=2e-06	GRCh37	12	0	NR	PGP000118	32991828	10.1016/j.ajhg.2020.08.025	TRUE	European:100	European:100	European:100	https://ftp.ebi.ac.uk/pub/databases/spot/pgs/scores/PGS000381/ScoringFiles/PGS000381.txt.gz	PGS obtained from the Catalog should be cited appropriately, and used in accordance with any licensing restrictions set by the authors. See EBI Terms of Use (https://www.ebi.ac.uk/about/terms-of-use/) for additional details.
PGS000382	PRSWEB_PHECODE153.2_UKBB-SAIGE-HRC-X153.2_LASSOSUM_MGI_20200608	Colon cancer	colon carcinoma	EFO_1001950	Lassosum	s=0.2;Lambda=0.03793	GRCh37	150	0	NR	PGP000118	32991828	10.1016/j.ajhg.2020.08.025	TRUE	European:100	European:100	European:100	https://ftp.ebi.ac.uk/pub/databases/spot/pgs/scores/PGS000382/ScoringFiles/PGS000382.txt.gz	PGS obtained from the Catalog should be cited appropriately, and used in accordance with any licensing restrictions set by the authors. See EBI Terms of Use (https://www.ebi.ac.uk/about/terms-of-use/) for additional details.
PGS000383	PRSWEB_PHECODE153.3_C19_PRS-CS_MGI_20200608	Malignant neoplasm of rectum, rectosigmoid junction, and anus	rectum cancer|rectosigmoid junction neoplasm	EFO_1000657|MONDO_0002423	PRS-CS	Parameters = auto; LD reference (eur)	GRCh37	1078799	0	NR	PGP000118	32991828	10.1016/j.ajhg.2020.08.025	TRUE	European:100	European:100	European:100	https://ftp.ebi.ac.uk/pub/databases/spot/pgs/scores/PGS000383/ScoringFiles/PGS000383.txt.gz	PGS obtained from the Catalog should be cited appropriately, and used in accordance with any licensing restrictions set by the authors. See EBI Terms of Use (https://www.ebi.ac.uk/about/terms-of-use/) for additional details.
PGS000384	PRSWEB_PHECODE153.3_C3-RECTUM_PRS-CS_MGI_20200608	Malignant neoplasm of rectum, rectosigmoid junction, and anus	rectum cancer|rectosigmoid junction neoplasm	EFO_1000657|MONDO_0002423	PRS-CS	Parameters = auto; LD reference (eur)	GRCh37	1104018	0	NR	PGP000118	32991828	10.1016/j.ajhg.2020.08.025	TRUE	European:100	European:100	European:100	https://ftp.ebi.ac.uk/pub/databases/spot/pgs/scores/PGS000384/ScoringFiles/PGS000384.txt.gz	PGS obtained from the Catalog should be cited appropriately, and used in accordance with any licensing restrictions set by the authors. See EBI Terms of Use (https://www.ebi.ac.uk/about/terms-of-use/) for additional details.
PGS000385	PRSWEB_PHECODE157_GWAS-Catalog-r2019-05-03-X157_P_5e-08_UKB_20200608	Pancreatic cancer	pancreatic carcinoma	EFO_0002618	GWAS Hits	LD Clumping (MAF >= 1%, r^2 <= 0.1) & P<=5e-08	GRCh37	17	0	NR	PGP000118	32991828	10.1016/j.ajhg.2020.08.025	TRUE	European:100	European:100	European:100	https://ftp.ebi.ac.uk/pub/databases/spot/pgs/scores/PGS000385/ScoringFiles/PGS000385.txt.gz	PGS obtained from the Catalog should be cited appropriately, and used in accordance with any licensing restrictions set by the authors. See EBI Terms of Use (https://www.ebi.ac.uk/about/terms-of-use/) for additional details.
PGS000386	PRSWEB_PHECODE157_GWAS-Catalog-r2019-05-03-X157_PT_UKB_20200608	Pancreatic cancer	pancreatic carcinoma	EFO_0002618	P&T	LD Clumping (MAF >= 1%, r^2 <= 0.1) & P<=5e-09	GRCh37	10	0	NR	PGP000118	32991828	10.1016/j.ajhg.2020.08.025	TRUE	European:100	European:100	European:100	https://ftp.ebi.ac.uk/pub/databases/spot/pgs/scores/PGS000386/ScoringFiles/PGS000386.txt.gz	PGS obtained from the Catalog should be cited appropriately, and used in accordance with any licensing restrictions set by the authors. See EBI Terms of Use (https://www.ebi.ac.uk/about/terms-of-use/) for additional details.
PGS000387	PRSWEB_PHECODE165_UKBB-SAIGE-HRC-X165_LASSOSUM_MGI_20200608	Cancer within the respiratory system	respiratory system cancer	MONDO_0000376	Lassosum	s=1;Lambda=0.01438	GRCh37	879334	0	NR	PGP000118	32991828	10.1016/j.ajhg.2020.08.025	TRUE	European:100	European:100	European:100	https://ftp.ebi.ac.uk/pub/databases/spot/pgs/scores/PGS000387/ScoringFiles/PGS000387.txt.gz	PGS obtained from the Catalog should be cited appropriately, and used in accordance with any licensing restrictions set by the authors. See EBI Terms of Use (https://www.ebi.ac.uk/about/terms-of-use/) for additional details.
PGS000388	PRSWEB_PHECODE165.1_C3-BRONCHUS-LUNG_PRS-CS_MGI_20200608	Cancer of bronchus; lung	bronchus cancer|lung cancer|tracheal cancer	MONDO_0001672|MONDO_0008903|MONDO_0001407	PRS-CS	Parameters = auto; LD reference (eur)	GRCh37	1109069	0	NR	PGP000118	32991828	10.1016/j.ajhg.2020.08.025	TRUE	European:100	European:100	European:100	https://ftp.ebi.ac.uk/pub/databases/spot/pgs/scores/PGS000388/ScoringFiles/PGS000388.txt.gz	PGS obtained from the Catalog should be cited appropriately, and used in accordance with any licensing restrictions set by the authors. See EBI Terms of Use (https://www.ebi.ac.uk/about/terms-of-use/) for additional details.
PGS000389	PRSWEB_PHECODE165.1_GWAS-Catalog-r2019-05-03-X165.1_P_5e-08_MGI_20200608	Cancer of bronchus; lung	bronchus cancer|lung cancer|tracheal cancer	MONDO_0001672|MONDO_0008903|MONDO_0001407	GWAS Hits	LD Clumping (MAF >= 1%, r^2 <= 0.1) & P<=5e-08	GRCh37	21	0	NR	PGP000118	32991828	10.1016/j.ajhg.2020.08.025	TRUE	European:100	European:100	European:100	https://ftp.ebi.ac.uk/pub/databases/spot/pgs/scores/PGS000389/ScoringFiles/PGS000389.txt.gz	PGS obtained from the Catalog should be cited appropriately, and used in accordance with any licensing restrictions set by the authors. See EBI Terms of Use (https://www.ebi.ac.uk/about/terms-of-use/) for additional details.
PGS000390	PRSWEB_PHECODE165.1_GWAS-Catalog-r2019-05-03-X165.1_P_5e-08_UKB_20200608	Cancer of bronchus; lung	bronchus cancer|lung cancer|tracheal cancer	MONDO_0001672|MONDO_0008903|MONDO_0001407	GWAS Hits	LD Clumping (MAF >= 1%, r^2 <= 0.1) & P<=5e-08	GRCh37	21	0	NR	PGP000118	32991828	10.1016/j.ajhg.2020.08.025	TRUE	European:100	European:100	European:100	https://ftp.ebi.ac.uk/pub/databases/spot/pgs/scores/PGS000390/ScoringFiles/PGS000390.txt.gz	PGS obtained from the Catalog should be cited appropriately, and used in accordance with any licensing restrictions set by the authors. See EBI Terms of Use (https://www.ebi.ac.uk/about/terms-of-use/) for additional details.
PGS000391	PRSWEB_PHECODE165.1_GWAS-Catalog-r2019-05-03-X165.1_PT_MGI_20200608	Cancer of bronchus; lung	bronchus cancer|lung cancer|tracheal cancer	MONDO_0001672|MONDO_0008903|MONDO_0001407	P&T	LD Clumping (MAF >= 1%, r^2 <= 0.1) & P<=1e-10	GRCh37	14	0	NR	PGP000118	32991828	10.1016/j.ajhg.2020.08.025	TRUE	European:100	European:100	European:100	https://ftp.ebi.ac.uk/pub/databases/spot/pgs/scores/PGS000391/ScoringFiles/PGS000391.txt.gz	PGS obtained from the Catalog should be cited appropriately, and used in accordance with any licensing restrictions set by the authors. See EBI Terms of Use (https://www.ebi.ac.uk/about/terms-of-use/) for additional details.
PGS000392	PRSWEB_PHECODE165.1_GWAS-Catalog-r2019-05-03-X165.1_PT_UKB_20200608	Cancer of bronchus; lung	bronchus cancer|lung cancer|tracheal cancer	MONDO_0001672|MONDO_0008903|MONDO_0001407	P&T	LD Clumping (MAF >= 1%, r^2 <= 0.1) & P<=2.51e-08	GRCh37	19	0	NR	PGP000118	32991828	10.1016/j.ajhg.2020.08.025	TRUE	European:100	European:100	European:100	https://ftp.ebi.ac.uk/pub/databases/spot/pgs/scores/PGS000392/ScoringFiles/PGS000392.txt.gz	PGS obtained from the Catalog should be cited appropriately, and used in accordance with any licensing restrictions set by the authors. See EBI Terms of Use (https://www.ebi.ac.uk/about/terms-of-use/) for additional details.
PGS000393	PRSWEB_PHECODE165.1_LUNG-CANCER_PRS-CS_MGI_20200608	Cancer of bronchus; lung	bronchus cancer|lung cancer|tracheal cancer	MONDO_0001672|MONDO_0008903|MONDO_0001407	PRS-CS	Parameters = auto; LD reference (eur)	GRCh37	1110438	0	NR	PGP000118	32991828	10.1016/j.ajhg.2020.08.025	TRUE	European:100	European:100	European:100	https://ftp.ebi.ac.uk/pub/databases/spot/pgs/scores/PGS000393/ScoringFiles/PGS000393.txt.gz	PGS obtained from the Catalog should be cited appropriately, and used in accordance with any licensing restrictions set by the authors. See EBI Terms of Use (https://www.ebi.ac.uk/about/terms-of-use/) for additional details.
PGS000394	PRSWEB_PHECODE165.1_LUNG-CANCER-MESOT_PRS-CS_MGI_20200608	Cancer of bronchus; lung	bronchus cancer|lung cancer|tracheal cancer	MONDO_0001672|MONDO_0008903|MONDO_0001407	PRS-CS	Parameters = auto; LD reference (eur)	GRCh37	1110438	0	NR	PGP000118	32991828	10.1016/j.ajhg.2020.08.025	TRUE	European:100	European:100	European:100	https://ftp.ebi.ac.uk/pub/databases/spot/pgs/scores/PGS000394/ScoringFiles/PGS000394.txt.gz	PGS obtained from the Catalog should be cited appropriately, and used in accordance with any licensing restrictions set by the authors. See EBI Terms of Use (https://www.ebi.ac.uk/about/terms-of-use/) for additional details.
PGS000395	PRSWEB_PHECODE165.1_UKBB-SAIGE-HRC-X165.1_PRS-CS_MGI_20200608	Cancer of bronchus; lung	bronchus cancer|lung cancer|tracheal cancer	MONDO_0001672|MONDO_0008903|MONDO_0001407	PRS-CS	Parameters = auto; LD reference (eur)	GRCh37	1119238	0	NR	PGP000118	32991828	10.1016/j.ajhg.2020.08.025	TRUE	European:100	European:100	European:100	https://ftp.ebi.ac.uk/pub/databases/spot/pgs/scores/PGS000395/ScoringFiles/PGS000395.txt.gz	PGS obtained from the Catalog should be cited appropriately, and used in accordance with any licensing restrictions set by the authors. See EBI Terms of Use (https://www.ebi.ac.uk/about/terms-of-use/) for additional details.
PGS000396	PRSWEB_PHECODE165.1_UKBB-SAIGE-HRC-X165.1_PT_MGI_20200608	Cancer of bronchus; lung	bronchus cancer|lung cancer|tracheal cancer	MONDO_0001672|MONDO_0008903|MONDO_0001407	P&T	LD Clumping (MAF >= 1%, r^2 <= 0.1) & P<=3.16e-05	GRCh37	75	0	NR	PGP000118	32991828	10.1016/j.ajhg.2020.08.025	TRUE	European:100	European:100	European:100	https://ftp.ebi.ac.uk/pub/databases/spot/pgs/scores/PGS000396/ScoringFiles/PGS000396.txt.gz	PGS obtained from the Catalog should be cited appropriately, and used in accordance with any licensing restrictions set by the authors. See EBI Terms of Use (https://www.ebi.ac.uk/about/terms-of-use/) for additional details.
PGS000397	PRSWEB_PHECODE165.1_UKBB-SAIGE-HRC-X165.1_LASSOSUM_MGI_20200608	Cancer of bronchus; lung	bronchus cancer|lung cancer|tracheal cancer	MONDO_0001672|MONDO_0008903|MONDO_0001407	Lassosum	s=0.2;Lambda=0.02336	GRCh37	46920	0	NR	PGP000118	32991828	10.1016/j.ajhg.2020.08.025	TRUE	European:100	European:100	European:100	https://ftp.ebi.ac.uk/pub/databases/spot/pgs/scores/PGS000397/ScoringFiles/PGS000397.txt.gz	PGS obtained from the Catalog should be cited appropriately, and used in accordance with any licensing restrictions set by the authors. See EBI Terms of Use (https://www.ebi.ac.uk/about/terms-of-use/) for additional details.
PGS000398	PRSWEB_PHECODE172_20001-1003_PRS-CS_MGI_20200608	Skin cancer	skin carcinoma	EFO_0009259	PRS-CS	Parameters = auto; LD reference (eur)	GRCh37	1103220	0	NR	PGP000118	32991828	10.1016/j.ajhg.2020.08.025	TRUE	European:100	European:100	European:100	https://ftp.ebi.ac.uk/pub/databases/spot/pgs/scores/PGS000398/ScoringFiles/PGS000398.txt.gz	PGS obtained from the Catalog should be cited appropriately, and used in accordance with any licensing restrictions set by the authors. See EBI Terms of Use (https://www.ebi.ac.uk/about/terms-of-use/) for additional details.
PGS000399	PRSWEB_PHECODE172_20001-1003_PT_MGI_20200608	Skin cancer	skin carcinoma	EFO_0009259	P&T	LD Clumping (MAF >= 1%, r^2 <= 0.1) & P<=6.31e-07	GRCh37	6	0	NR	PGP000118	32991828	10.1016/j.ajhg.2020.08.025	TRUE	European:100	European:100	European:100	https://ftp.ebi.ac.uk/pub/databases/spot/pgs/scores/PGS000399/ScoringFiles/PGS000399.txt.gz	PGS obtained from the Catalog should be cited appropriately, and used in accordance with any licensing restrictions set by the authors. See EBI Terms of Use (https://www.ebi.ac.uk/about/terms-of-use/) for additional details.
PGS000400	PRSWEB_PHECODE172_C3-SKIN_P_5e-08_MGI_20200608	Skin cancer	skin carcinoma	EFO_0009259	GWAS Hits	LD Clumping (MAF >= 1%, r^2 <= 0.1) & P<=5e-08	GRCh37	95	0	NR	PGP000118	32991828	10.1016/j.ajhg.2020.08.025	TRUE	European:100	European:100	European:100	https://ftp.ebi.ac.uk/pub/databases/spot/pgs/scores/PGS000400/ScoringFiles/PGS000400.txt.gz	PGS obtained from the Catalog should be cited appropriately, and used in accordance with any licensing restrictions set by the authors. See EBI Terms of Use (https://www.ebi.ac.uk/about/terms-of-use/) for additional details.
PGS000401	PRSWEB_PHECODE172_C3-SKIN_PRS-CS_MGI_20200608	Skin cancer	skin carcinoma	EFO_0009259	PRS-CS	Parameters = auto; LD reference (eur)	GRCh37	1111490	0	NR	PGP000118	32991828	10.1016/j.ajhg.2020.08.025	TRUE	European:100	European:100	European:100	https://ftp.ebi.ac.uk/pub/databases/spot/pgs/scores/PGS000401/ScoringFiles/PGS000401.txt.gz	PGS obtained from the Catalog should be cited appropriately, and used in accordance with any licensing restrictions set by the authors. See EBI Terms of Use (https://www.ebi.ac.uk/about/terms-of-use/) for additional details.
PGS000402	PRSWEB_PHECODE172_C3-SKIN_PT_MGI_20200608	Skin cancer	skin carcinoma	EFO_0009259	P&T	LD Clumping (MAF >= 1%, r^2 <= 0.1) & P<=3.98e-05	GRCh37	389	0	NR	PGP000118	32991828	10.1016/j.ajhg.2020.08.025	TRUE	European:100	European:100	European:100	https://ftp.ebi.ac.uk/pub/databases/spot/pgs/scores/PGS000402/ScoringFiles/PGS000402.txt.gz	PGS obtained from the Catalog should be cited appropriately, and used in accordance with any licensing restrictions set by the authors. See EBI Terms of Use (https://www.ebi.ac.uk/about/terms-of-use/) for additional details.
PGS000403	PRSWEB_PHECODE172_C3-SKIN_LASSOSUM_MGI_20200608	Skin cancer	skin carcinoma	EFO_0009259	Lassosum	s=0.5;Lambda=0.01129	GRCh37	16316	0	NR	PGP000118	32991828	10.1016/j.ajhg.2020.08.025	TRUE	European:100	European:100	European:100	https://ftp.ebi.ac.uk/pub/databases/spot/pgs/scores/PGS000403/ScoringFiles/PGS000403.txt.gz	PGS obtained from the Catalog should be cited appropriately, and used in accordance with any licensing restrictions set by the authors. See EBI Terms of Use (https://www.ebi.ac.uk/about/terms-of-use/) for additional details.
PGS000404	PRSWEB_PHECODE172_UKBB-SAIGE-HRC-X172_P_5e-08_MGI_20200608	Skin cancer	skin carcinoma	EFO_0009259	GWAS Hits	LD Clumping (MAF >= 1%, r^2 <= 0.1) & P<=5e-08	GRCh37	80	0	NR	PGP000118	32991828	10.1016/j.ajhg.2020.08.025	TRUE	European:100	European:100	European:100	https://ftp.ebi.ac.uk/pub/databases/spot/pgs/scores/PGS000404/ScoringFiles/PGS000404.txt.gz	PGS obtained from the Catalog should be cited appropriately, and used in accordance with any licensing restrictions set by the authors. See EBI Terms of Use (https://www.ebi.ac.uk/about/terms-of-use/) for additional details.
PGS000405	PRSWEB_PHECODE172_UKBB-SAIGE-HRC-X172_PRS-CS_MGI_20200608	Skin cancer	skin carcinoma	EFO_0009259	PRS-CS	Parameters = auto; LD reference (eur)	GRCh37	1119238	0	NR	PGP000118	32991828	10.1016/j.ajhg.2020.08.025	TRUE	European:100	European:100	European:100	https://ftp.ebi.ac.uk/pub/databases/spot/pgs/scores/PGS000405/ScoringFiles/PGS000405.txt.gz	PGS obtained from the Catalog should be cited appropriately, and used in accordance with any licensing restrictions set by the authors. See EBI Terms of Use (https://www.ebi.ac.uk/about/terms-of-use/) for additional details.
PGS000406	PRSWEB_PHECODE172_UKBB-SAIGE-HRC-X172_PT_MGI_20200608	Skin cancer	skin carcinoma	EFO_0009259	P&T	LD Clumping (MAF >= 1%, r^2 <= 0.1) & P<=3.16e-05	GRCh37	292	0	NR	PGP000118	32991828	10.1016/j.ajhg.2020.08.025	TRUE	European:100	European:100	European:100	https://ftp.ebi.ac.uk/pub/databases/spot/pgs/scores/PGS000406/ScoringFiles/PGS000406.txt.gz	PGS obtained from the Catalog should be cited appropriately, and used in accordance with any licensing restrictions set by the authors. See EBI Terms of Use (https://www.ebi.ac.uk/about/terms-of-use/) for additional details.
PGS000407	PRSWEB_PHECODE172_UKBB-SAIGE-HRC-X172_LASSOSUM_MGI_20200608	Skin cancer	skin carcinoma	EFO_0009259	Lassosum	s=0.2;Lambda=0.01438	GRCh37	3166	0	NR	PGP000118	32991828	10.1016/j.ajhg.2020.08.025	TRUE	European:100	European:100	European:100	https://ftp.ebi.ac.uk/pub/databases/spot/pgs/scores/PGS000407/ScoringFiles/PGS000407.txt.gz	PGS obtained from the Catalog should be cited appropriately, and used in accordance with any licensing restrictions set by the authors. See EBI Terms of Use (https://www.ebi.ac.uk/about/terms-of-use/) for additional details.
PGS000408	PRSWEB_PHECODE172.1_20001-1059_P_5e-08_MGI_20200608	Melanomas of skin (diagnosis or history)	melanoma	EFO_0000756	GWAS Hits	LD Clumping (MAF >= 1%, r^2 <= 0.1) & P<=5e-08	GRCh37	10	0	NR	PGP000118	32991828	10.1016/j.ajhg.2020.08.025	TRUE	European:100	European:100	European:100	https://ftp.ebi.ac.uk/pub/databases/spot/pgs/scores/PGS000408/ScoringFiles/PGS000408.txt.gz	PGS obtained from the Catalog should be cited appropriately, and used in accordance with any licensing restrictions set by the authors. See EBI Terms of Use (https://www.ebi.ac.uk/about/terms-of-use/) for additional details.
PGS000409	PRSWEB_PHECODE172.1_20001-1059_PRS-CS_MGI_20200608	Melanomas of skin (diagnosis or history)	melanoma	EFO_0000756	PRS-CS	Parameters = auto; LD reference (eur)	GRCh37	1111490	0	NR	PGP000118	32991828	10.1016/j.ajhg.2020.08.025	TRUE	European:100	European:100	European:100	https://ftp.ebi.ac.uk/pub/databases/spot/pgs/scores/PGS000409/ScoringFiles/PGS000409.txt.gz	PGS obtained from the Catalog should be cited appropriately, and used in accordance with any licensing restrictions set by the authors. See EBI Terms of Use (https://www.ebi.ac.uk/about/terms-of-use/) for additional details.
PGS000410	PRSWEB_PHECODE172.1_20001-1059_PT_MGI_20200608	Melanomas of skin (diagnosis or history)	melanoma	EFO_0000756	P&T	LD Clumping (MAF >= 1%, r^2 <= 0.1) & P<=2e-11	GRCh37	7	0	NR	PGP000118	32991828	10.1016/j.ajhg.2020.08.025	TRUE	European:100	European:100	European:100	https://ftp.ebi.ac.uk/pub/databases/spot/pgs/scores/PGS000410/ScoringFiles/PGS000410.txt.gz	PGS obtained from the Catalog should be cited appropriately, and used in accordance with any licensing restrictions set by the authors. See EBI Terms of Use (https://www.ebi.ac.uk/about/terms-of-use/) for additional details.
PGS000411	PRSWEB_PHECODE172.1_20001-1059_LASSOSUM_MGI_20200608	Melanomas of skin (diagnosis or history)	melanoma	EFO_0000756	Lassosum	s=0.2;Lambda=0.03793	GRCh37	185	0	NR	PGP000118	32991828	10.1016/j.ajhg.2020.08.025	TRUE	European:100	European:100	European:100	https://ftp.ebi.ac.uk/pub/databases/spot/pgs/scores/PGS000411/ScoringFiles/PGS000411.txt.gz	PGS obtained from the Catalog should be cited appropriately, and used in accordance with any licensing restrictions set by the authors. See EBI Terms of Use (https://www.ebi.ac.uk/about/terms-of-use/) for additional details.
PGS000412	PRSWEB_PHECODE172.1_C3-MELANOMA-SKIN_P_5e-08_MGI_20200608	Melanomas of skin (diagnosis or history)	melanoma	EFO_0000756	GWAS Hits	LD Clumping (MAF >= 1%, r^2 <= 0.1) & P<=5e-08	GRCh37	16	0	NR	PGP000118	32991828	10.1016/j.ajhg.2020.08.025	TRUE	European:100	European:100	European:100	https://ftp.ebi.ac.uk/pub/databases/spot/pgs/scores/PGS000412/ScoringFiles/PGS000412.txt.gz	PGS obtained from the Catalog should be cited appropriately, and used in accordance with any licensing restrictions set by the authors. See EBI Terms of Use (https://www.ebi.ac.uk/about/terms-of-use/) for additional details.
PGS000413	PRSWEB_PHECODE172.1_C3-MELANOMA-SKIN_PRS-CS_MGI_20200608	Melanomas of skin (diagnosis or history)	melanoma	EFO_0000756	PRS-CS	Parameters = auto; LD reference (eur)	GRCh37	1111490	0	NR	PGP000118	32991828	10.1016/j.ajhg.2020.08.025	TRUE	European:100	European:100	European:100	https://ftp.ebi.ac.uk/pub/databases/spot/pgs/scores/PGS000413/ScoringFiles/PGS000413.txt.gz	PGS obtained from the Catalog should be cited appropriately, and used in accordance with any licensing restrictions set by the authors. See EBI Terms of Use (https://www.ebi.ac.uk/about/terms-of-use/) for additional details.
PGS000414	PRSWEB_PHECODE172.1_C3-MELANOMA-SKIN_PT_MGI_20200608	Melanomas of skin (diagnosis or history)	melanoma	EFO_0000756	P&T	LD Clumping (MAF >= 1%, r^2 <= 0.1) & P<=1.26e-07	GRCh37	21	0	NR	PGP000118	32991828	10.1016/j.ajhg.2020.08.025	TRUE	European:100	European:100	European:100	https://ftp.ebi.ac.uk/pub/databases/spot/pgs/scores/PGS000414/ScoringFiles/PGS000414.txt.gz	PGS obtained from the Catalog should be cited appropriately, and used in accordance with any licensing restrictions set by the authors. See EBI Terms of Use (https://www.ebi.ac.uk/about/terms-of-use/) for additional details.
PGS000415	PRSWEB_PHECODE172.1_C3-MELANOMA-SKIN_LASSOSUM_MGI_20200608	Melanomas of skin (diagnosis or history)	melanoma	EFO_0000756	Lassosum	s=0.2;Lambda=0.03793	GRCh37	505	0	NR	PGP000118	32991828	10.1016/j.ajhg.2020.08.025	TRUE	European:100	European:100	European:100	https://ftp.ebi.ac.uk/pub/databases/spot/pgs/scores/PGS000415/ScoringFiles/PGS000415.txt.gz	PGS obtained from the Catalog should be cited appropriately, and used in accordance with any licensing restrictions set by the authors. See EBI Terms of Use (https://www.ebi.ac.uk/about/terms-of-use/) for additional details.
PGS000416	PRSWEB_PHECODE172.1_C43_P_5e-08_MGI_20200608	Melanomas of skin (diagnosis or history)	melanoma	EFO_0000756	GWAS Hits	LD Clumping (MAF >= 1%, r^2 <= 0.1) & P<=5e-08	GRCh37	9	0	NR	PGP000118	32991828	10.1016/j.ajhg.2020.08.025	TRUE	European:100	European:100	European:100	https://ftp.ebi.ac.uk/pub/databases/spot/pgs/scores/PGS000416/ScoringFiles/PGS000416.txt.gz	PGS obtained from the Catalog should be cited appropriately, and used in accordance with any licensing restrictions set by the authors. See EBI Terms of Use (https://www.ebi.ac.uk/about/terms-of-use/) for additional details.
PGS000417	PRSWEB_PHECODE172.1_C43_PRS-CS_MGI_20200608	Melanomas of skin (diagnosis or history)	melanoma	EFO_0000756	PRS-CS	Parameters = auto; LD reference (eur)	GRCh37	1109519	0	NR	PGP000118	32991828	10.1016/j.ajhg.2020.08.025	TRUE	European:100	European:100	European:100	https://ftp.ebi.ac.uk/pub/databases/spot/pgs/scores/PGS000417/ScoringFiles/PGS000417.txt.gz	PGS obtained from the Catalog should be cited appropriately, and used in accordance with any licensing restrictions set by the authors. See EBI Terms of Use (https://www.ebi.ac.uk/about/terms-of-use/) for additional details.
PGS000418	PRSWEB_PHECODE172.1_C43_PT_MGI_20200608	Melanomas of skin (diagnosis or history)	melanoma	EFO_0000756	P&T	LD Clumping (MAF >= 1%, r^2 <= 0.1) & P<=5e-08	GRCh37	9	0	NR	PGP000118	32991828	10.1016/j.ajhg.2020.08.025	TRUE	European:100	European:100	European:100	https://ftp.ebi.ac.uk/pub/databases/spot/pgs/scores/PGS000418/ScoringFiles/PGS000418.txt.gz	PGS obtained from the Catalog should be cited appropriately, and used in accordance with any licensing restrictions set by the authors. See EBI Terms of Use (https://www.ebi.ac.uk/about/terms-of-use/) for additional details.
PGS000419	PRSWEB_PHECODE172.1_C43_LASSOSUM_MGI_20200608	Melanomas of skin (diagnosis or history)	melanoma	EFO_0000756	Lassosum	s=0.5;Lambda=0.04833	GRCh37	436	0	NR	PGP000118	32991828	10.1016/j.ajhg.2020.08.025	TRUE	European:100	European:100	European:100	https://ftp.ebi.ac.uk/pub/databases/spot/pgs/scores/PGS000419/ScoringFiles/PGS000419.txt.gz	PGS obtained from the Catalog should be cited appropriately, and used in accordance with any licensing restrictions set by the authors. See EBI Terms of Use (https://www.ebi.ac.uk/about/terms-of-use/) for additional details.
PGS000420	PRSWEB_PHECODE172.1_D03_PT_MGI_20200608	Melanomas of skin (diagnosis or history)	melanoma	EFO_0000756	P&T	LD Clumping (MAF >= 1%, r^2 <= 0.1) & P<=7.94e-05	GRCh37	147	0	NR	PGP000118	32991828	10.1016/j.ajhg.2020.08.025	TRUE	European:100	European:100	European:100	https://ftp.ebi.ac.uk/pub/databases/spot/pgs/scores/PGS000420/ScoringFiles/PGS000420.txt.gz	PGS obtained from the Catalog should be cited appropriately, and used in accordance with any licensing restrictions set by the authors. See EBI Terms of Use (https://www.ebi.ac.uk/about/terms-of-use/) for additional details.
PGS000421	PRSWEB_PHECODE172.1_GWAS-Catalog-r2019-05-03-X172.1_P_5e-08_MGI_20200608	Melanomas of skin (diagnosis or history)	melanoma	EFO_0000756	GWAS Hits	LD Clumping (MAF >= 1%, r^2 <= 0.1) & P<=5e-08	GRCh37	18	0	NR	PGP000118	32991828	10.1016/j.ajhg.2020.08.025	TRUE	European:100	European:100	European:100	https://ftp.ebi.ac.uk/pub/databases/spot/pgs/scores/PGS000421/ScoringFiles/PGS000421.txt.gz	PGS obtained from the Catalog should be cited appropriately, and used in accordance with any licensing restrictions set by the authors. See EBI Terms of Use (https://www.ebi.ac.uk/about/terms-of-use/) for additional details.
PGS000422	PRSWEB_PHECODE172.1_GWAS-Catalog-r2019-05-03-X172.1_P_5e-08_UKB_20200608	Melanomas of skin (diagnosis or history)	melanoma	EFO_0000756	GWAS Hits	LD Clumping (MAF >= 1%, r^2 <= 0.1) & P<=5e-08	GRCh37	18	0	NR	PGP000118	32991828	10.1016/j.ajhg.2020.08.025	TRUE	European:100	European:100	European:100	https://ftp.ebi.ac.uk/pub/databases/spot/pgs/scores/PGS000422/ScoringFiles/PGS000422.txt.gz	PGS obtained from the Catalog should be cited appropriately, and used in accordance with any licensing restrictions set by the authors. See EBI Terms of Use (https://www.ebi.ac.uk/about/terms-of-use/) for additional details.
PGS000423	PRSWEB_PHECODE172.1_GWAS-Catalog-r2019-05-03-X172.1_PT_MGI_20200608	Melanomas of skin (diagnosis or history)	melanoma	EFO_0000756	P&T	LD Clumping (MAF >= 1%, r^2 <= 0.1) & P<=1e-06	GRCh37	29	0	NR	PGP000118	32991828	10.1016/j.ajhg.2020.08.025	TRUE	European:100	European:100	European:100	https://ftp.ebi.ac.uk/pub/databases/spot/pgs/scores/PGS000423/ScoringFiles/PGS000423.txt.gz	PGS obtained from the Catalog should be cited appropriately, and used in accordance with any licensing restrictions set by the authors. See EBI Terms of Use (https://www.ebi.ac.uk/about/terms-of-use/) for additional details.
PGS000424	PRSWEB_PHECODE172.1_GWAS-Catalog-r2019-05-03-X172.1_PT_UKB_20200608	Melanomas of skin (diagnosis or history)	melanoma	EFO_0000756	P&T	LD Clumping (MAF >= 1%, r^2 <= 0.1) & P<=5e-07	GRCh37	27	0	NR	PGP000118	32991828	10.1016/j.ajhg.2020.08.025	TRUE	European:100	European:100	European:100	https://ftp.ebi.ac.uk/pub/databases/spot/pgs/scores/PGS000424/ScoringFiles/PGS000424.txt.gz	PGS obtained from the Catalog should be cited appropriately, and used in accordance with any licensing restrictions set by the authors. See EBI Terms of Use (https://www.ebi.ac.uk/about/terms-of-use/) for additional details.
PGS000425	PRSWEB_PHECODE172.1_Melanoma-Ransohoff_P_5e-08_MGI_20200608	Melanomas of skin (diagnosis or history)	melanoma	EFO_0000756	GWAS Hits	LD Clumping (MAF >= 1%, r^2 <= 0.1) & P<=5e-08	GRCh37	20	0	NR	PGP000118	32991828	10.1016/j.ajhg.2020.08.025	TRUE	European:100	European:100	European:100	https://ftp.ebi.ac.uk/pub/databases/spot/pgs/scores/PGS000425/ScoringFiles/PGS000425.txt.gz	PGS obtained from the Catalog should be cited appropriately, and used in accordance with any licensing restrictions set by the authors. See EBI Terms of Use (https://www.ebi.ac.uk/about/terms-of-use/) for additional details.
PGS000426	PRSWEB_PHECODE172.1_Melanoma-Ransohoff_P_5e-08_UKB_20200608	Melanomas of skin (diagnosis or history)	melanoma	EFO_0000756	GWAS Hits	LD Clumping (MAF >= 1%, r^2 <= 0.1) & P<=5e-08	GRCh37	20	0	NR	PGP000118	32991828	10.1016/j.ajhg.2020.08.025	TRUE	European:100	European:100	European:100	https://ftp.ebi.ac.uk/pub/databases/spot/pgs/scores/PGS000426/ScoringFiles/PGS000426.txt.gz	PGS obtained from the Catalog should be cited appropriately, and used in accordance with any licensing restrictions set by the authors. See EBI Terms of Use (https://www.ebi.ac.uk/about/terms-of-use/) for additional details.
PGS000427	PRSWEB_PHECODE172.1_Melanoma-Ransohoff_PT_MGI_20200608	Melanomas of skin (diagnosis or history)	melanoma	EFO_0000756	P&T	LD Clumping (MAF >= 1%, r^2 <= 0.1) & P<=3.5e-08	GRCh37	20	0	NR	PGP000118	32991828	10.1016/j.ajhg.2020.08.025	TRUE	European:100	European:100	European:100	https://ftp.ebi.ac.uk/pub/databases/spot/pgs/scores/PGS000427/ScoringFiles/PGS000427.txt.gz	PGS obtained from the Catalog should be cited appropriately, and used in accordance with any licensing restrictions set by the authors. See EBI Terms of Use (https://www.ebi.ac.uk/about/terms-of-use/) for additional details.
PGS000428	PRSWEB_PHECODE172.1_Melanoma-Ransohoff_PT_UKB_20200608	Melanomas of skin (diagnosis or history)	melanoma	EFO_0000756	P&T	LD Clumping (MAF >= 1%, r^2 <= 0.1) & P<=3.5e-08	GRCh37	20	0	NR	PGP000118	32991828	10.1016/j.ajhg.2020.08.025	TRUE	European:100	European:100	European:100	https://ftp.ebi.ac.uk/pub/databases/spot/pgs/scores/PGS000428/ScoringFiles/PGS000428.txt.gz	PGS obtained from the Catalog should be cited appropriately, and used in accordance with any licensing restrictions set by the authors. See EBI Terms of Use (https://www.ebi.ac.uk/about/terms-of-use/) for additional details.
PGS000429	PRSWEB_PHECODE172.1_UKBB-SAIGE-HRC-X172.1_P_5e-08_MGI_20200608	Melanomas of skin (diagnosis or history)	melanoma	EFO_0000756	GWAS Hits	LD Clumping (MAF >= 1%, r^2 <= 0.1) & P<=5e-08	GRCh37	12	0	NR	PGP000118	32991828	10.1016/j.ajhg.2020.08.025	TRUE	European:100	European:100	European:100	https://ftp.ebi.ac.uk/pub/databases/spot/pgs/scores/PGS000429/ScoringFiles/PGS000429.txt.gz	PGS obtained from the Catalog should be cited appropriately, and used in accordance with any licensing restrictions set by the authors. See EBI Terms of Use (https://www.ebi.ac.uk/about/terms-of-use/) for additional details.
PGS000430	PRSWEB_PHECODE172.1_UKBB-SAIGE-HRC-X172.1_PRS-CS_MGI_20200608	Melanomas of skin (diagnosis or history)	melanoma	EFO_0000756	PRS-CS	Parameters = auto; LD reference (eur)	GRCh37	1119238	0	NR	PGP000118	32991828	10.1016/j.ajhg.2020.08.025	TRUE	European:100	European:100	European:100	https://ftp.ebi.ac.uk/pub/databases/spot/pgs/scores/PGS000430/ScoringFiles/PGS000430.txt.gz	PGS obtained from the Catalog should be cited appropriately, and used in accordance with any licensing restrictions set by the authors. See EBI Terms of Use (https://www.ebi.ac.uk/about/terms-of-use/) for additional details.
PGS000431	PRSWEB_PHECODE172.1_UKBB-SAIGE-HRC-X172.1_PT_MGI_20200608	Melanomas of skin (diagnosis or history)	melanoma	EFO_0000756	P&T	LD Clumping (MAF >= 1%, r^2 <= 0.1) & P<=2e-07	GRCh37	15	0	NR	PGP000118	32991828	10.1016/j.ajhg.2020.08.025	TRUE	European:100	European:100	European:100	https://ftp.ebi.ac.uk/pub/databases/spot/pgs/scores/PGS000431/ScoringFiles/PGS000431.txt.gz	PGS obtained from the Catalog should be cited appropriately, and used in accordance with any licensing restrictions set by the authors. See EBI Terms of Use (https://www.ebi.ac.uk/about/terms-of-use/) for additional details.
PGS000432	PRSWEB_PHECODE172.1_UKBB-SAIGE-HRC-X172.1_LASSOSUM_MGI_20200608	Melanomas of skin (diagnosis or history)	melanoma	EFO_0000756	Lassosum	s=0.2;Lambda=0.03793	GRCh37	296	0	NR	PGP000118	32991828	10.1016/j.ajhg.2020.08.025	TRUE	European:100	European:100	European:100	https://ftp.ebi.ac.uk/pub/databases/spot/pgs/scores/PGS000432/ScoringFiles/PGS000432.txt.gz	PGS obtained from the Catalog should be cited appropriately, and used in accordance with any licensing restrictions set by the authors. See EBI Terms of Use (https://www.ebi.ac.uk/about/terms-of-use/) for additional details.
PGS000433	PRSWEB_PHECODE172.2_C3-OTHER-SKIN_P_5e-08_MGI_20200608	Other non-epithelial cancer of skin	skin cancer	MONDO_0002898	GWAS Hits	LD Clumping (MAF >= 1%, r^2 <= 0.1) & P<=5e-08	GRCh37	108	0	NR	PGP000118	32991828	10.1016/j.ajhg.2020.08.025	TRUE	European:100	European:100	European:100	https://ftp.ebi.ac.uk/pub/databases/spot/pgs/scores/PGS000433/ScoringFiles/PGS000433.txt.gz	PGS obtained from the Catalog should be cited appropriately, and used in accordance with any licensing restrictions set by the authors. See EBI Terms of Use (https://www.ebi.ac.uk/about/terms-of-use/) for additional details.
PGS000434	PRSWEB_PHECODE172.2_C3-OTHER-SKIN_PRS-CS_MGI_20200608	Other non-epithelial cancer of skin	skin cancer	MONDO_0002898	PRS-CS	Parameters = auto; LD reference (eur)	GRCh37	1111490	0	NR	PGP000118	32991828	10.1016/j.ajhg.2020.08.025	TRUE	European:100	European:100	European:100	https://ftp.ebi.ac.uk/pub/databases/spot/pgs/scores/PGS000434/ScoringFiles/PGS000434.txt.gz	PGS obtained from the Catalog should be cited appropriately, and used in accordance with any licensing restrictions set by the authors. See EBI Terms of Use (https://www.ebi.ac.uk/about/terms-of-use/) for additional details.
PGS000435	PRSWEB_PHECODE172.2_C3-OTHER-SKIN_PT_MGI_20200608	Other non-epithelial cancer of skin	skin cancer	MONDO_0002898	P&T	LD Clumping (MAF >= 1%, r^2 <= 0.1) & P<=5e-05	GRCh37	446	0	NR	PGP000118	32991828	10.1016/j.ajhg.2020.08.025	TRUE	European:100	European:100	European:100	https://ftp.ebi.ac.uk/pub/databases/spot/pgs/scores/PGS000435/ScoringFiles/PGS000435.txt.gz	PGS obtained from the Catalog should be cited appropriately, and used in accordance with any licensing restrictions set by the authors. See EBI Terms of Use (https://www.ebi.ac.uk/about/terms-of-use/) for additional details.
PGS000436	PRSWEB_PHECODE172.2_C3-OTHER-SKIN_LASSOSUM_MGI_20200608	Other non-epithelial cancer of skin	skin cancer	MONDO_0002898	Lassosum	s=0.2;Lambda=0.01129	GRCh37	16626	0	NR	PGP000118	32991828	10.1016/j.ajhg.2020.08.025	TRUE	European:100	European:100	European:100	https://ftp.ebi.ac.uk/pub/databases/spot/pgs/scores/PGS000436/ScoringFiles/PGS000436.txt.gz	PGS obtained from the Catalog should be cited appropriately, and used in accordance with any licensing restrictions set by the authors. See EBI Terms of Use (https://www.ebi.ac.uk/about/terms-of-use/) for additional details.
PGS000437	PRSWEB_PHECODE172.2_C44_P_5e-08_MGI_20200608	Other non-epithelial cancer of skin	skin cancer	MONDO_0002898	GWAS Hits	LD Clumping (MAF >= 1%, r^2 <= 0.1) & P<=5e-08	GRCh37	63	0	NR	PGP000118	32991828	10.1016/j.ajhg.2020.08.025	TRUE	European:100	European:100	European:100	https://ftp.ebi.ac.uk/pub/databases/spot/pgs/scores/PGS000437/ScoringFiles/PGS000437.txt.gz	PGS obtained from the Catalog should be cited appropriately, and used in accordance with any licensing restrictions set by the authors. See EBI Terms of Use (https://www.ebi.ac.uk/about/terms-of-use/) for additional details.
PGS000438	PRSWEB_PHECODE172.2_C44_PRS-CS_MGI_20200608	Other non-epithelial cancer of skin	skin cancer	MONDO_0002898	PRS-CS	Parameters = auto; LD reference (eur)	GRCh37	1111490	0	NR	PGP000118	32991828	10.1016/j.ajhg.2020.08.025	TRUE	European:100	European:100	European:100	https://ftp.ebi.ac.uk/pub/databases/spot/pgs/scores/PGS000438/ScoringFiles/PGS000438.txt.gz	PGS obtained from the Catalog should be cited appropriately, and used in accordance with any licensing restrictions set by the authors. See EBI Terms of Use (https://www.ebi.ac.uk/about/terms-of-use/) for additional details.
PGS000439	PRSWEB_PHECODE172.2_C44_PT_MGI_20200608	Other non-epithelial cancer of skin	skin cancer	MONDO_0002898	P&T	LD Clumping (MAF >= 1%, r^2 <= 0.1) & P<=9.99e-05	GRCh37	467	0	NR	PGP000118	32991828	10.1016/j.ajhg.2020.08.025	TRUE	European:100	European:100	European:100	https://ftp.ebi.ac.uk/pub/databases/spot/pgs/scores/PGS000439/ScoringFiles/PGS000439.txt.gz	PGS obtained from the Catalog should be cited appropriately, and used in accordance with any licensing restrictions set by the authors. See EBI Terms of Use (https://www.ebi.ac.uk/about/terms-of-use/) for additional details.
PGS000440	PRSWEB_PHECODE172.2_C44_LASSOSUM_MGI_20200608	Other non-epithelial cancer of skin	skin cancer	MONDO_0002898	Lassosum	s=0.2;Lambda=0.01833	GRCh37	2111	0	NR	PGP000118	32991828	10.1016/j.ajhg.2020.08.025	TRUE	European:100	European:100	European:100	https://ftp.ebi.ac.uk/pub/databases/spot/pgs/scores/PGS000440/ScoringFiles/PGS000440.txt.gz	PGS obtained from the Catalog should be cited appropriately, and used in accordance with any licensing restrictions set by the authors. See EBI Terms of Use (https://www.ebi.ac.uk/about/terms-of-use/) for additional details.
PGS000441	PRSWEB_PHECODE172.2_UKBB-SAIGE-HRC-X172.2_P_5e-08_MGI_20200608	Other non-epithelial cancer of skin	skin cancer	MONDO_0002898	GWAS Hits	LD Clumping (MAF >= 1%, r^2 <= 0.1) & P<=5e-08	GRCh37	77	0	NR	PGP000118	32991828	10.1016/j.ajhg.2020.08.025	TRUE	European:100	European:100	European:100	https://ftp.ebi.ac.uk/pub/databases/spot/pgs/scores/PGS000441/ScoringFiles/PGS000441.txt.gz	PGS obtained from the Catalog should be cited appropriately, and used in accordance with any licensing restrictions set by the authors. See EBI Terms of Use (https://www.ebi.ac.uk/about/terms-of-use/) for additional details.
PGS000442	PRSWEB_PHECODE172.2_UKBB-SAIGE-HRC-X172.2_PRS-CS_MGI_20200608	Other non-epithelial cancer of skin	skin cancer	MONDO_0002898	PRS-CS	Parameters = auto; LD reference (eur)	GRCh37	1119238	0	NR	PGP000118	32991828	10.1016/j.ajhg.2020.08.025	TRUE	European:100	European:100	European:100	https://ftp.ebi.ac.uk/pub/databases/spot/pgs/scores/PGS000442/ScoringFiles/PGS000442.txt.gz	PGS obtained from the Catalog should be cited appropriately, and used in accordance with any licensing restrictions set by the authors. See EBI Terms of Use (https://www.ebi.ac.uk/about/terms-of-use/) for additional details.
PGS000443	PRSWEB_PHECODE172.2_UKBB-SAIGE-HRC-X172.2_PT_MGI_20200608	Other non-epithelial cancer of skin	skin cancer	MONDO_0002898	P&T	LD Clumping (MAF >= 1%, r^2 <= 0.1) & P<=7.94e-06	GRCh37	177	0	NR	PGP000118	32991828	10.1016/j.ajhg.2020.08.025	TRUE	European:100	European:100	European:100	https://ftp.ebi.ac.uk/pub/databases/spot/pgs/scores/PGS000443/ScoringFiles/PGS000443.txt.gz	PGS obtained from the Catalog should be cited appropriately, and used in accordance with any licensing restrictions set by the authors. See EBI Terms of Use (https://www.ebi.ac.uk/about/terms-of-use/) for additional details.
PGS000444	PRSWEB_PHECODE172.2_UKBB-SAIGE-HRC-X172.2_LASSOSUM_MGI_20200608	Other non-epithelial cancer of skin	skin cancer	MONDO_0002898	Lassosum	s=0.2;Lambda=0.01438	GRCh37	7231	0	NR	PGP000118	32991828	10.1016/j.ajhg.2020.08.025	TRUE	European:100	European:100	European:100	https://ftp.ebi.ac.uk/pub/databases/spot/pgs/scores/PGS000444/ScoringFiles/PGS000444.txt.gz	PGS obtained from the Catalog should be cited appropriately, and used in accordance with any licensing restrictions set by the authors. See EBI Terms of Use (https://www.ebi.ac.uk/about/terms-of-use/) for additional details.
PGS000445	PRSWEB_PHECODE172.21_20001-1061_P_5e-08_MGI_20200608	Basal cell carcinoma	basal cell carcinoma	EFO_0004193	GWAS Hits	LD Clumping (MAF >= 1%, r^2 <= 0.1) & P<=5e-08	GRCh37	19	0	NR	PGP000118	32991828	10.1016/j.ajhg.2020.08.025	TRUE	European:100	European:100	European:100	https://ftp.ebi.ac.uk/pub/databases/spot/pgs/scores/PGS000445/ScoringFiles/PGS000445.txt.gz	PGS obtained from the Catalog should be cited appropriately, and used in accordance with any licensing restrictions set by the authors. See EBI Terms of Use (https://www.ebi.ac.uk/about/terms-of-use/) for additional details.
PGS000446	PRSWEB_PHECODE172.21_20001-1061_PRS-CS_MGI_20200608	Basal cell carcinoma	basal cell carcinoma	EFO_0004193	PRS-CS	Parameters = auto; LD reference (eur)	GRCh37	1111490	0	NR	PGP000118	32991828	10.1016/j.ajhg.2020.08.025	TRUE	European:100	European:100	European:100	https://ftp.ebi.ac.uk/pub/databases/spot/pgs/scores/PGS000446/ScoringFiles/PGS000446.txt.gz	PGS obtained from the Catalog should be cited appropriately, and used in accordance with any licensing restrictions set by the authors. See EBI Terms of Use (https://www.ebi.ac.uk/about/terms-of-use/) for additional details.
PGS000447	PRSWEB_PHECODE172.21_20001-1061_PT_MGI_20200608	Basal cell carcinoma	basal cell carcinoma	EFO_0004193	P&T	LD Clumping (MAF >= 1%, r^2 <= 0.1) & P<=1e-05	GRCh37	72	0	NR	PGP000118	32991828	10.1016/j.ajhg.2020.08.025	TRUE	European:100	European:100	European:100	https://ftp.ebi.ac.uk/pub/databases/spot/pgs/scores/PGS000447/ScoringFiles/PGS000447.txt.gz	PGS obtained from the Catalog should be cited appropriately, and used in accordance with any licensing restrictions set by the authors. See EBI Terms of Use (https://www.ebi.ac.uk/about/terms-of-use/) for additional details.
PGS000448	PRSWEB_PHECODE172.21_20001-1061_LASSOSUM_MGI_20200608	Basal cell carcinoma	basal cell carcinoma	EFO_0004193	Lassosum	s=0.2;Lambda=0.03793	GRCh37	183	0	NR	PGP000118	32991828	10.1016/j.ajhg.2020.08.025	TRUE	European:100	European:100	European:100	https://ftp.ebi.ac.uk/pub/databases/spot/pgs/scores/PGS000448/ScoringFiles/PGS000448.txt.gz	PGS obtained from the Catalog should be cited appropriately, and used in accordance with any licensing restrictions set by the authors. See EBI Terms of Use (https://www.ebi.ac.uk/about/terms-of-use/) for additional details.
PGS000449	PRSWEB_PHECODE172.21_20001-1073_PRS-CS_MGI_20200608	Basal cell carcinoma	basal cell carcinoma	EFO_0004193	PRS-CS	Parameters = auto; LD reference (eur)	GRCh37	1073162	0	NR	PGP000118	32991828	10.1016/j.ajhg.2020.08.025	TRUE	European:100	European:100	European:100	https://ftp.ebi.ac.uk/pub/databases/spot/pgs/scores/PGS000449/ScoringFiles/PGS000449.txt.gz	PGS obtained from the Catalog should be cited appropriately, and used in accordance with any licensing restrictions set by the authors. See EBI Terms of Use (https://www.ebi.ac.uk/about/terms-of-use/) for additional details.
PGS000450	PRSWEB_PHECODE172.21_20001-1073_PT_MGI_20200608	Basal cell carcinoma	basal cell carcinoma	EFO_0004193	P&T	LD Clumping (MAF >= 1%, r^2 <= 0.1) & P<=3.16e-06	GRCh37	8	0	NR	PGP000118	32991828	10.1016/j.ajhg.2020.08.025	TRUE	European:100	European:100	European:100	https://ftp.ebi.ac.uk/pub/databases/spot/pgs/scores/PGS000450/ScoringFiles/PGS000450.txt.gz	PGS obtained from the Catalog should be cited appropriately, and used in accordance with any licensing restrictions set by the authors. See EBI Terms of Use (https://www.ebi.ac.uk/about/terms-of-use/) for additional details.
PGS000451	PRSWEB_PHECODE172.21_20001-1073_LASSOSUM_MGI_20200608	Basal cell carcinoma	basal cell carcinoma	EFO_0004193	Lassosum	s=1;Lambda=0.07848	GRCh37	2231	0	NR	PGP000118	32991828	10.1016/j.ajhg.2020.08.025	TRUE	European:100	European:100	European:100	https://ftp.ebi.ac.uk/pub/databases/spot/pgs/scores/PGS000451/ScoringFiles/PGS000451.txt.gz	PGS obtained from the Catalog should be cited appropriately, and used in accordance with any licensing restrictions set by the authors. See EBI Terms of Use (https://www.ebi.ac.uk/about/terms-of-use/) for additional details.
PGS000452	PRSWEB_PHECODE172.21_BCC-Chahal_P_5e-08_MGI_20200608	Basal cell carcinoma	basal cell carcinoma	EFO_0004193	GWAS Hits	LD Clumping (MAF >= 1%, r^2 <= 0.1) & P<=5e-08	GRCh37	28	0	NR	PGP000118	32991828	10.1016/j.ajhg.2020.08.025	TRUE	European:100	European:100	European:100	https://ftp.ebi.ac.uk/pub/databases/spot/pgs/scores/PGS000452/ScoringFiles/PGS000452.txt.gz	PGS obtained from the Catalog should be cited appropriately, and used in accordance with any licensing restrictions set by the authors. See EBI Terms of Use (https://www.ebi.ac.uk/about/terms-of-use/) for additional details.
PGS000453	PRSWEB_PHECODE172.21_BCC-Chahal_P_5e-08_UKB_20200608	Basal cell carcinoma	basal cell carcinoma	EFO_0004193	GWAS Hits	LD Clumping (MAF >= 1%, r^2 <= 0.1) & P<=5e-08	GRCh37	28	0	NR	PGP000118	32991828	10.1016/j.ajhg.2020.08.025	TRUE	European:100	European:100	European:100	https://ftp.ebi.ac.uk/pub/databases/spot/pgs/scores/PGS000453/ScoringFiles/PGS000453.txt.gz	PGS obtained from the Catalog should be cited appropriately, and used in accordance with any licensing restrictions set by the authors. See EBI Terms of Use (https://www.ebi.ac.uk/about/terms-of-use/) for additional details.
PGS000454	PRSWEB_PHECODE172.21_BCC-Chahal_PT_MGI_20200608	Basal cell carcinoma	basal cell carcinoma	EFO_0004193	P&T	LD Clumping (MAF >= 1%, r^2 <= 0.1) & P<=3.98e-08	GRCh37	27	0	NR	PGP000118	32991828	10.1016/j.ajhg.2020.08.025	TRUE	European:100	European:100	European:100	https://ftp.ebi.ac.uk/pub/databases/spot/pgs/scores/PGS000454/ScoringFiles/PGS000454.txt.gz	PGS obtained from the Catalog should be cited appropriately, and used in accordance with any licensing restrictions set by the authors. See EBI Terms of Use (https://www.ebi.ac.uk/about/terms-of-use/) for additional details.
PGS000455	PRSWEB_PHECODE172.21_BCC-Chahal_PT_UKB_20200608	Basal cell carcinoma	basal cell carcinoma	EFO_0004193	P&T	LD Clumping (MAF >= 1%, r^2 <= 0.1) & P<=4.2e-08	GRCh37	28	0	NR	PGP000118	32991828	10.1016/j.ajhg.2020.08.025	TRUE	European:100	European:100	European:100	https://ftp.ebi.ac.uk/pub/databases/spot/pgs/scores/PGS000455/ScoringFiles/PGS000455.txt.gz	PGS obtained from the Catalog should be cited appropriately, and used in accordance with any licensing restrictions set by the authors. See EBI Terms of Use (https://www.ebi.ac.uk/about/terms-of-use/) for additional details.
PGS000456	PRSWEB_PHECODE172.21_GWAS-Catalog-r2019-05-03-X172.21_P_5e-08_MGI_20200608	Basal cell carcinoma	basal cell carcinoma	EFO_0004193	GWAS Hits	LD Clumping (MAF >= 1%, r^2 <= 0.1) & P<=5e-08	GRCh37	30	0	NR	PGP000118	32991828	10.1016/j.ajhg.2020.08.025	TRUE	European:100	European:100	European:100	https://ftp.ebi.ac.uk/pub/databases/spot/pgs/scores/PGS000456/ScoringFiles/PGS000456.txt.gz	PGS obtained from the Catalog should be cited appropriately, and used in accordance with any licensing restrictions set by the authors. See EBI Terms of Use (https://www.ebi.ac.uk/about/terms-of-use/) for additional details.
PGS000457	PRSWEB_PHECODE172.21_GWAS-Catalog-r2019-05-03-X172.21_P_5e-08_UKB_20200608	Basal cell carcinoma	basal cell carcinoma	EFO_0004193	GWAS Hits	LD Clumping (MAF >= 1%, r^2 <= 0.1) & P<=5e-08	GRCh37	30	0	NR	PGP000118	32991828	10.1016/j.ajhg.2020.08.025	TRUE	European:100	European:100	European:100	https://ftp.ebi.ac.uk/pub/databases/spot/pgs/scores/PGS000457/ScoringFiles/PGS000457.txt.gz	PGS obtained from the Catalog should be cited appropriately, and used in accordance with any licensing restrictions set by the authors. See EBI Terms of Use (https://www.ebi.ac.uk/about/terms-of-use/) for additional details.
PGS000458	PRSWEB_PHECODE172.21_GWAS-Catalog-r2019-05-03-X172.21_PT_MGI_20200608	Basal cell carcinoma	basal cell carcinoma	EFO_0004193	P&T	LD Clumping (MAF >= 1%, r^2 <= 0.1) & P<=2.51e-10	GRCh37	23	0	NR	PGP000118	32991828	10.1016/j.ajhg.2020.08.025	TRUE	European:100	European:100	European:100	https://ftp.ebi.ac.uk/pub/databases/spot/pgs/scores/PGS000458/ScoringFiles/PGS000458.txt.gz	PGS obtained from the Catalog should be cited appropriately, and used in accordance with any licensing restrictions set by the authors. See EBI Terms of Use (https://www.ebi.ac.uk/about/terms-of-use/) for additional details.
PGS000459	PRSWEB_PHECODE172.21_GWAS-Catalog-r2019-05-03-X172.21_PT_UKB_20200608	Basal cell carcinoma	basal cell carcinoma	EFO_0004193	P&T	LD Clumping (MAF >= 1%, r^2 <= 0.1) & P<=5e-09	GRCh37	24	0	NR	PGP000118	32991828	10.1016/j.ajhg.2020.08.025	TRUE	European:100	European:100	European:100	https://ftp.ebi.ac.uk/pub/databases/spot/pgs/scores/PGS000459/ScoringFiles/PGS000459.txt.gz	PGS obtained from the Catalog should be cited appropriately, and used in accordance with any licensing restrictions set by the authors. See EBI Terms of Use (https://www.ebi.ac.uk/about/terms-of-use/) for additional details.
PGS000460	PRSWEB_PHECODE172.22_20001-1062_LASSOSUM_MGI_20200608	Squamous cell carcinoma	squamous cell carcinoma	EFO_0000707	Lassosum	s=1;Lambda=0.00336	GRCh37	4279140	0	NR	PGP000118	32991828	10.1016/j.ajhg.2020.08.025	TRUE	European:100	European:100	European:100	https://ftp.ebi.ac.uk/pub/databases/spot/pgs/scores/PGS000460/ScoringFiles/PGS000460.txt.gz	PGS obtained from the Catalog should be cited appropriately, and used in accordance with any licensing restrictions set by the authors. See EBI Terms of Use (https://www.ebi.ac.uk/about/terms-of-use/) for additional details.
PGS000461	PRSWEB_PHECODE172.22_GWAS-Catalog-r2019-05-03-X172.22_P_5e-08_MGI_20200608	Squamous cell carcinoma	squamous cell carcinoma	EFO_0000707	GWAS Hits	LD Clumping (MAF >= 1%, r^2 <= 0.1) & P<=5e-08	GRCh37	13	0	NR	PGP000118	32991828	10.1016/j.ajhg.2020.08.025	TRUE	European:100	European:100	European:100	https://ftp.ebi.ac.uk/pub/databases/spot/pgs/scores/PGS000461/ScoringFiles/PGS000461.txt.gz	PGS obtained from the Catalog should be cited appropriately, and used in accordance with any licensing restrictions set by the authors. See EBI Terms of Use (https://www.ebi.ac.uk/about/terms-of-use/) for additional details.
PGS000462	PRSWEB_PHECODE172.22_GWAS-Catalog-r2019-05-03-X172.22_P_5e-08_UKB_20200608	Squamous cell carcinoma	squamous cell carcinoma	EFO_0000707	GWAS Hits	LD Clumping (MAF >= 1%, r^2 <= 0.1) & P<=5e-08	GRCh37	13	0	NR	PGP000118	32991828	10.1016/j.ajhg.2020.08.025	TRUE	European:100	European:100	European:100	https://ftp.ebi.ac.uk/pub/databases/spot/pgs/scores/PGS000462/ScoringFiles/PGS000462.txt.gz	PGS obtained from the Catalog should be cited appropriately, and used in accordance with any licensing restrictions set by the authors. See EBI Terms of Use (https://www.ebi.ac.uk/about/terms-of-use/) for additional details.
PGS000463	PRSWEB_PHECODE172.22_GWAS-Catalog-r2019-05-03-X172.22_PT_MGI_20200608	Squamous cell carcinoma	squamous cell carcinoma	EFO_0000707	P&T	LD Clumping (MAF >= 1%, r^2 <= 0.1) & P<=1e-11	GRCh37	7	0	NR	PGP000118	32991828	10.1016/j.ajhg.2020.08.025	TRUE	European:100	European:100	European:100	https://ftp.ebi.ac.uk/pub/databases/spot/pgs/scores/PGS000463/ScoringFiles/PGS000463.txt.gz	PGS obtained from the Catalog should be cited appropriately, and used in accordance with any licensing restrictions set by the authors. See EBI Terms of Use (https://www.ebi.ac.uk/about/terms-of-use/) for additional details.
PGS000464	PRSWEB_PHECODE172.22_GWAS-Catalog-r2019-05-03-X172.22_PT_UKB_20200608	Squamous cell carcinoma	squamous cell carcinoma	EFO_0000707	P&T	LD Clumping (MAF >= 1%, r^2 <= 0.1) & P<=1e-07	GRCh37	14	0	NR	PGP000118	32991828	10.1016/j.ajhg.2020.08.025	TRUE	European:100	European:100	European:100	https://ftp.ebi.ac.uk/pub/databases/spot/pgs/scores/PGS000464/ScoringFiles/PGS000464.txt.gz	PGS obtained from the Catalog should be cited appropriately, and used in accordance with any licensing restrictions set by the authors. See EBI Terms of Use (https://www.ebi.ac.uk/about/terms-of-use/) for additional details.
PGS000465	PRSWEB_PHECODE172.22_cSCC-Chahal_P_5e-08_MGI_20200608	Squamous cell carcinoma	squamous cell carcinoma	EFO_0000707	GWAS Hits	LD Clumping (MAF >= 1%, r^2 <= 0.1) & P<=5e-08	GRCh37	10	0	NR	PGP000118	32991828	10.1016/j.ajhg.2020.08.025	TRUE	European:100	European:100	European:100	https://ftp.ebi.ac.uk/pub/databases/spot/pgs/scores/PGS000465/ScoringFiles/PGS000465.txt.gz	PGS obtained from the Catalog should be cited appropriately, and used in accordance with any licensing restrictions set by the authors. See EBI Terms of Use (https://www.ebi.ac.uk/about/terms-of-use/) for additional details.
PGS000466	PRSWEB_PHECODE172.22_cSCC-Chahal_P_5e-08_UKB_20200608	Squamous cell carcinoma	squamous cell carcinoma	EFO_0000707	GWAS Hits	LD Clumping (MAF >= 1%, r^2 <= 0.1) & P<=5e-08	GRCh37	10	0	NR	PGP000118	32991828	10.1016/j.ajhg.2020.08.025	TRUE	European:100	European:100	European:100	https://ftp.ebi.ac.uk/pub/databases/spot/pgs/scores/PGS000466/ScoringFiles/PGS000466.txt.gz	PGS obtained from the Catalog should be cited appropriately, and used in accordance with any licensing restrictions set by the authors. See EBI Terms of Use (https://www.ebi.ac.uk/about/terms-of-use/) for additional details.
PGS000467	PRSWEB_PHECODE172.22_cSCC-Chahal_PT_MGI_20200608	Squamous cell carcinoma	squamous cell carcinoma	EFO_0000707	P&T	LD Clumping (MAF >= 1%, r^2 <= 0.1) & P<=7.94e-09	GRCh37	6	0	NR	PGP000118	32991828	10.1016/j.ajhg.2020.08.025	TRUE	European:100	European:100	European:100	https://ftp.ebi.ac.uk/pub/databases/spot/pgs/scores/PGS000467/ScoringFiles/PGS000467.txt.gz	PGS obtained from the Catalog should be cited appropriately, and used in accordance with any licensing restrictions set by the authors. See EBI Terms of Use (https://www.ebi.ac.uk/about/terms-of-use/) for additional details.
PGS000468	PRSWEB_PHECODE172.22_cSCC-Chahal_PT_UKB_20200608	Squamous cell carcinoma	squamous cell carcinoma	EFO_0000707	P&T	LD Clumping (MAF >= 1%, r^2 <= 0.1) & P<=1.58e-08	GRCh37	9	0	NR	PGP000118	32991828	10.1016/j.ajhg.2020.08.025	TRUE	European:100	European:100	European:100	https://ftp.ebi.ac.uk/pub/databases/spot/pgs/scores/PGS000468/ScoringFiles/PGS000468.txt.gz	PGS obtained from the Catalog should be cited appropriately, and used in accordance with any licensing restrictions set by the authors. See EBI Terms of Use (https://www.ebi.ac.uk/about/terms-of-use/) for additional details.
PGS000469	PRSWEB_PHECODE172.3_UKBB-SAIGE-HRC-X172.3_PRS-CS_MGI_20200608	Carcinoma in situ of skin	skin carcinoma in situ	MONDO_0004641	PRS-CS	Parameters = auto; LD reference (eur)	GRCh37	1119238	0	NR	PGP000118	32991828	10.1016/j.ajhg.2020.08.025	TRUE	European:100	European:100	European:100	https://ftp.ebi.ac.uk/pub/databases/spot/pgs/scores/PGS000469/ScoringFiles/PGS000469.txt.gz	PGS obtained from the Catalog should be cited appropriately, and used in accordance with any licensing restrictions set by the authors. See EBI Terms of Use (https://www.ebi.ac.uk/about/terms-of-use/) for additional details.
PGS000470	PRSWEB_PHECODE172.3_UKBB-SAIGE-HRC-X172.3_PT_MGI_20200608	Carcinoma in situ of skin	skin carcinoma in situ	MONDO_0004641	P&T	LD Clumping (MAF >= 1%, r^2 <= 0.1) & P<=5e-07	GRCh37	5	0	NR	PGP000118	32991828	10.1016/j.ajhg.2020.08.025	TRUE	European:100	European:100	European:100	https://ftp.ebi.ac.uk/pub/databases/spot/pgs/scores/PGS000470/ScoringFiles/PGS000470.txt.gz	PGS obtained from the Catalog should be cited appropriately, and used in accordance with any licensing restrictions set by the authors. See EBI Terms of Use (https://www.ebi.ac.uk/about/terms-of-use/) for additional details.
PGS000471	PRSWEB_PHECODE172.3_UKBB-SAIGE-HRC-X172.3_LASSOSUM_MGI_20200608	Carcinoma in situ of skin	skin carcinoma in situ	MONDO_0004641	Lassosum	s=0.2;Lambda=0.1	GRCh37	7	0	NR	PGP000118	32991828	10.1016/j.ajhg.2020.08.025	TRUE	European:100	European:100	European:100	https://ftp.ebi.ac.uk/pub/databases/spot/pgs/scores/PGS000471/ScoringFiles/PGS000471.txt.gz	PGS obtained from the Catalog should be cited appropriately, and used in accordance with any licensing restrictions set by the authors. See EBI Terms of Use (https://www.ebi.ac.uk/about/terms-of-use/) for additional details.
PGS000472	PRSWEB_PHECODE174.1_20001-1002_P_5e-08_MGI_20200608	Breast cancer (female)	breast carcinoma	EFO_0000305	GWAS Hits	LD Clumping (MAF >= 1%, r^2 <= 0.1) & P<=5e-08	GRCh37	22	0	NR	PGP000118	32991828	10.1016/j.ajhg.2020.08.025	TRUE	European:100	European:100	European:100	https://ftp.ebi.ac.uk/pub/databases/spot/pgs/scores/PGS000472/ScoringFiles/PGS000472.txt.gz	PGS obtained from the Catalog should be cited appropriately, and used in accordance with any licensing restrictions set by the authors. See EBI Terms of Use (https://www.ebi.ac.uk/about/terms-of-use/) for additional details.
PGS000473	PRSWEB_PHECODE174.1_20001-1002_PRS-CS_MGI_20200608	Breast cancer (female)	breast carcinoma	EFO_0000305	PRS-CS	Parameters = auto; LD reference (eur)	GRCh37	1111495	0	NR	PGP000118	32991828	10.1016/j.ajhg.2020.08.025	TRUE	European:100	European:100	European:100	https://ftp.ebi.ac.uk/pub/databases/spot/pgs/scores/PGS000473/ScoringFiles/PGS000473.txt.gz	PGS obtained from the Catalog should be cited appropriately, and used in accordance with any licensing restrictions set by the authors. See EBI Terms of Use (https://www.ebi.ac.uk/about/terms-of-use/) for additional details.
PGS000474	PRSWEB_PHECODE174.1_20001-1002_PT_MGI_20200608	Breast cancer (female)	breast carcinoma	EFO_0000305	P&T	LD Clumping (MAF >= 1%, r^2 <= 0.1) & P<=6.31e-06	GRCh37	68	0	NR	PGP000118	32991828	10.1016/j.ajhg.2020.08.025	TRUE	European:100	European:100	European:100	https://ftp.ebi.ac.uk/pub/databases/spot/pgs/scores/PGS000474/ScoringFiles/PGS000474.txt.gz	PGS obtained from the Catalog should be cited appropriately, and used in accordance with any licensing restrictions set by the authors. See EBI Terms of Use (https://www.ebi.ac.uk/about/terms-of-use/) for additional details.
PGS000475	PRSWEB_PHECODE174.1_20001-1002_LASSOSUM_MGI_20200608	Breast cancer (female)	breast carcinoma	EFO_0000305	Lassosum	s=0.5;Lambda=0.01438	GRCh37	30041	0	NR	PGP000118	32991828	10.1016/j.ajhg.2020.08.025	TRUE	European:100	European:100	European:100	https://ftp.ebi.ac.uk/pub/databases/spot/pgs/scores/PGS000475/ScoringFiles/PGS000475.txt.gz	PGS obtained from the Catalog should be cited appropriately, and used in accordance with any licensing restrictions set by the authors. See EBI Terms of Use (https://www.ebi.ac.uk/about/terms-of-use/) for additional details.
PGS000476	PRSWEB_PHECODE174.1_C3-BREAST-3_P_5e-08_MGI_20200608	Breast cancer (female)	breast carcinoma	EFO_0000305	GWAS Hits	LD Clumping (MAF >= 1%, r^2 <= 0.1) & P<=5e-08	GRCh37	32	0	NR	PGP000118	32991828	10.1016/j.ajhg.2020.08.025	TRUE	European:100	European:100	European:100	https://ftp.ebi.ac.uk/pub/databases/spot/pgs/scores/PGS000476/ScoringFiles/PGS000476.txt.gz	PGS obtained from the Catalog should be cited appropriately, and used in accordance with any licensing restrictions set by the authors. See EBI Terms of Use (https://www.ebi.ac.uk/about/terms-of-use/) for additional details.
PGS000477	PRSWEB_PHECODE174.1_C3-BREAST-3_PRS-CS_MGI_20200608	Breast cancer (female)	breast carcinoma	EFO_0000305	PRS-CS	Parameters = auto; LD reference (eur)	GRCh37	1111495	0	NR	PGP000118	32991828	10.1016/j.ajhg.2020.08.025	TRUE	European:100	European:100	European:100	https://ftp.ebi.ac.uk/pub/databases/spot/pgs/scores/PGS000477/ScoringFiles/PGS000477.txt.gz	PGS obtained from the Catalog should be cited appropriately, and used in accordance with any licensing restrictions set by the authors. See EBI Terms of Use (https://www.ebi.ac.uk/about/terms-of-use/) for additional details.
PGS000478	PRSWEB_PHECODE174.1_C3-BREAST-3_PT_MGI_20200608	Breast cancer (female)	breast carcinoma	EFO_0000305	P&T	LD Clumping (MAF >= 1%, r^2 <= 0.1) & P<=1.26e-05	GRCh37	120	0	NR	PGP000118	32991828	10.1016/j.ajhg.2020.08.025	TRUE	European:100	European:100	European:100	https://ftp.ebi.ac.uk/pub/databases/spot/pgs/scores/PGS000478/ScoringFiles/PGS000478.txt.gz	PGS obtained from the Catalog should be cited appropriately, and used in accordance with any licensing restrictions set by the authors. See EBI Terms of Use (https://www.ebi.ac.uk/about/terms-of-use/) for additional details.
PGS000479	PRSWEB_PHECODE174.1_C3-BREAST-3_LASSOSUM_MGI_20200608	Breast cancer (female)	breast carcinoma	EFO_0000305	Lassosum	s=0.5;Lambda=0.01833	GRCh37	2267	0	NR	PGP000118	32991828	10.1016/j.ajhg.2020.08.025	TRUE	European:100	European:100	European:100	https://ftp.ebi.ac.uk/pub/databases/spot/pgs/scores/PGS000479/ScoringFiles/PGS000479.txt.gz	PGS obtained from the Catalog should be cited appropriately, and used in accordance with any licensing restrictions set by the authors. See EBI Terms of Use (https://www.ebi.ac.uk/about/terms-of-use/) for additional details.
PGS000480	PRSWEB_PHECODE174.1_C50_P_5e-08_MGI_20200608	Breast cancer (female)	breast carcinoma	EFO_0000305	GWAS Hits	LD Clumping (MAF >= 1%, r^2 <= 0.1) & P<=5e-08	GRCh37	20	0	NR	PGP000118	32991828	10.1016/j.ajhg.2020.08.025	TRUE	European:100	European:100	European:100	https://ftp.ebi.ac.uk/pub/databases/spot/pgs/scores/PGS000480/ScoringFiles/PGS000480.txt.gz	PGS obtained from the Catalog should be cited appropriately, and used in accordance with any licensing restrictions set by the authors. See EBI Terms of Use (https://www.ebi.ac.uk/about/terms-of-use/) for additional details.
PGS000481	PRSWEB_PHECODE174.1_C50_PRS-CS_MGI_20200608	Breast cancer (female)	breast carcinoma	EFO_0000305	PRS-CS	Parameters = auto; LD reference (eur)	GRCh37	1111495	0	NR	PGP000118	32991828	10.1016/j.ajhg.2020.08.025	TRUE	European:100	European:100	European:100	https://ftp.ebi.ac.uk/pub/databases/spot/pgs/scores/PGS000481/ScoringFiles/PGS000481.txt.gz	PGS obtained from the Catalog should be cited appropriately, and used in accordance with any licensing restrictions set by the authors. See EBI Terms of Use (https://www.ebi.ac.uk/about/terms-of-use/) for additional details.
PGS000482	PRSWEB_PHECODE174.1_C50_PT_MGI_20200608	Breast cancer (female)	breast carcinoma	EFO_0000305	P&T	LD Clumping (MAF >= 1%, r^2 <= 0.1) & P<=1.58e-06	GRCh37	42	0	NR	PGP000118	32991828	10.1016/j.ajhg.2020.08.025	TRUE	European:100	European:100	European:100	https://ftp.ebi.ac.uk/pub/databases/spot/pgs/scores/PGS000482/ScoringFiles/PGS000482.txt.gz	PGS obtained from the Catalog should be cited appropriately, and used in accordance with any licensing restrictions set by the authors. See EBI Terms of Use (https://www.ebi.ac.uk/about/terms-of-use/) for additional details.
PGS000483	PRSWEB_PHECODE174.1_C50_LASSOSUM_MGI_20200608	Breast cancer (female)	breast carcinoma	EFO_0000305	Lassosum	s=0.5;Lambda=0.01833	GRCh37	4047	0	NR	PGP000118	32991828	10.1016/j.ajhg.2020.08.025	TRUE	European:100	European:100	European:100	https://ftp.ebi.ac.uk/pub/databases/spot/pgs/scores/PGS000483/ScoringFiles/PGS000483.txt.gz	PGS obtained from the Catalog should be cited appropriately, and used in accordance with any licensing restrictions set by the authors. See EBI Terms of Use (https://www.ebi.ac.uk/about/terms-of-use/) for additional details.
PGS000484	PRSWEB_PHECODE174.1_D05_PT_MGI_20200608	Breast cancer (female)	breast carcinoma	EFO_0000305	P&T	LD Clumping (MAF >= 1%, r^2 <= 0.1) & P<=7.94e-06	GRCh37	25	0	NR	PGP000118	32991828	10.1016/j.ajhg.2020.08.025	TRUE	European:100	European:100	European:100	https://ftp.ebi.ac.uk/pub/databases/spot/pgs/scores/PGS000484/ScoringFiles/PGS000484.txt.gz	PGS obtained from the Catalog should be cited appropriately, and used in accordance with any licensing restrictions set by the authors. See EBI Terms of Use (https://www.ebi.ac.uk/about/terms-of-use/) for additional details.
PGS000485	PRSWEB_PHECODE174.1_GWAS-Catalog-r2019-05-03-X174.1_P_5e-08_MGI_20200608	Breast cancer (female)	breast carcinoma	EFO_0000305	GWAS Hits	LD Clumping (MAF >= 1%, r^2 <= 0.1) & P<=5e-08	GRCh37	62	0	NR	PGP000118	32991828	10.1016/j.ajhg.2020.08.025	TRUE	European:100	European:100	European:100	https://ftp.ebi.ac.uk/pub/databases/spot/pgs/scores/PGS000485/ScoringFiles/PGS000485.txt.gz	PGS obtained from the Catalog should be cited appropriately, and used in accordance with any licensing restrictions set by the authors. See EBI Terms of Use (https://www.ebi.ac.uk/about/terms-of-use/) for additional details.
PGS000486	PRSWEB_PHECODE174.1_GWAS-Catalog-r2019-05-03-X174.1_P_5e-08_UKB_20200608	Breast cancer (female)	breast carcinoma	EFO_0000305	GWAS Hits	LD Clumping (MAF >= 1%, r^2 <= 0.1) & P<=5e-08	GRCh37	86	0	NR	PGP000118	32991828	10.1016/j.ajhg.2020.08.025	TRUE	European:100	European:100	European:100	https://ftp.ebi.ac.uk/pub/databases/spot/pgs/scores/PGS000486/ScoringFiles/PGS000486.txt.gz	PGS obtained from the Catalog should be cited appropriately, and used in accordance with any licensing restrictions set by the authors. See EBI Terms of Use (https://www.ebi.ac.uk/about/terms-of-use/) for additional details.
PGS000487	PRSWEB_PHECODE174.1_GWAS-Catalog-r2019-05-03-X174.1_PT_MGI_20200608	Breast cancer (female)	breast carcinoma	EFO_0000305	P&T	LD Clumping (MAF >= 1%, r^2 <= 0.1) & P<=3.16e-09	GRCh37	62	0	NR	PGP000118	32991828	10.1016/j.ajhg.2020.08.025	TRUE	European:100	European:100	European:100	https://ftp.ebi.ac.uk/pub/databases/spot/pgs/scores/PGS000487/ScoringFiles/PGS000487.txt.gz	PGS obtained from the Catalog should be cited appropriately, and used in accordance with any licensing restrictions set by the authors. See EBI Terms of Use (https://www.ebi.ac.uk/about/terms-of-use/) for additional details.
PGS000488	PRSWEB_PHECODE174.1_GWAS-Catalog-r2019-05-03-X174.1_PT_UKB_20200608	Breast cancer (female)	breast carcinoma	EFO_0000305	P&T	LD Clumping (MAF >= 1%, r^2 <= 0.1) & P<=2.51e-08	GRCh37	79	0	NR	PGP000118	32991828	10.1016/j.ajhg.2020.08.025	TRUE	European:100	European:100	European:100	https://ftp.ebi.ac.uk/pub/databases/spot/pgs/scores/PGS000488/ScoringFiles/PGS000488.txt.gz	PGS obtained from the Catalog should be cited appropriately, and used in accordance with any licensing restrictions set by the authors. See EBI Terms of Use (https://www.ebi.ac.uk/about/terms-of-use/) for additional details.
PGS000489	PRSWEB_PHECODE174.1_Onco-iCOGS-ER-negative-BRCA_P_5e-08_MGI_20200608	Breast cancer (female)	breast carcinoma	EFO_0000305	GWAS Hits	LD Clumping (MAF >= 1%, r^2 <= 0.1) & P<=5e-08	GRCh37	49	0	NR	PGP000118	32991828	10.1016/j.ajhg.2020.08.025	TRUE	European:100	European:100	European:100	https://ftp.ebi.ac.uk/pub/databases/spot/pgs/scores/PGS000489/ScoringFiles/PGS000489.txt.gz	PGS obtained from the Catalog should be cited appropriately, and used in accordance with any licensing restrictions set by the authors. See EBI Terms of Use (https://www.ebi.ac.uk/about/terms-of-use/) for additional details.
PGS000490	PRSWEB_PHECODE174.1_Onco-iCOGS-ER-negative-BRCA_P_5e-08_UKB_20200608	Breast cancer (female)	breast carcinoma	EFO_0000305	GWAS Hits	LD Clumping (MAF >= 1%, r^2 <= 0.1) & P<=5e-08	GRCh37	49	0	NR	PGP000118	32991828	10.1016/j.ajhg.2020.08.025	TRUE	European:100	European:100	European:100	https://ftp.ebi.ac.uk/pub/databases/spot/pgs/scores/PGS000490/ScoringFiles/PGS000490.txt.gz	PGS obtained from the Catalog should be cited appropriately, and used in accordance with any licensing restrictions set by the authors. See EBI Terms of Use (https://www.ebi.ac.uk/about/terms-of-use/) for additional details.
PGS000491	PRSWEB_PHECODE174.1_Onco-iCOGS-ER-negative-BRCA_PRS-CS_MGI_20200608	Breast cancer (female)	breast carcinoma	EFO_0000305	PRS-CS	Parameters = auto; LD reference (eur)	GRCh37	1119140	0	NR	PGP000118	32991828	10.1016/j.ajhg.2020.08.025	TRUE	European:100	European:100	European:100	https://ftp.ebi.ac.uk/pub/databases/spot/pgs/scores/PGS000491/ScoringFiles/PGS000491.txt.gz	PGS obtained from the Catalog should be cited appropriately, and used in accordance with any licensing restrictions set by the authors. See EBI Terms of Use (https://www.ebi.ac.uk/about/terms-of-use/) for additional details.
PGS000492	PRSWEB_PHECODE174.1_Onco-iCOGS-ER-negative-BRCA_PRS-CS_UKB_20200608	Breast cancer (female)	breast carcinoma	EFO_0000305	PRS-CS	Parameters = auto; LD reference (eur)	GRCh37	1120410	0	NR	PGP000118	32991828	10.1016/j.ajhg.2020.08.025	TRUE	European:100	European:100	European:100	https://ftp.ebi.ac.uk/pub/databases/spot/pgs/scores/PGS000492/ScoringFiles/PGS000492.txt.gz	PGS obtained from the Catalog should be cited appropriately, and used in accordance with any licensing restrictions set by the authors. See EBI Terms of Use (https://www.ebi.ac.uk/about/terms-of-use/) for additional details.
PGS000493	PRSWEB_PHECODE174.1_Onco-iCOGS-ER-negative-BRCA_PT_MGI_20200608	Breast cancer (female)	breast carcinoma	EFO_0000305	P&T	LD Clumping (MAF >= 1%, r^2 <= 0.1) & P<=1.58e-05	GRCh37	217	0	NR	PGP000118	32991828	10.1016/j.ajhg.2020.08.025	TRUE	European:100	European:100	European:100	https://ftp.ebi.ac.uk/pub/databases/spot/pgs/scores/PGS000493/ScoringFiles/PGS000493.txt.gz	PGS obtained from the Catalog should be cited appropriately, and used in accordance with any licensing restrictions set by the authors. See EBI Terms of Use (https://www.ebi.ac.uk/about/terms-of-use/) for additional details.
PGS000494	PRSWEB_PHECODE174.1_Onco-iCOGS-ER-negative-BRCA_PT_UKB_20200608	Breast cancer (female)	breast carcinoma	EFO_0000305	P&T	LD Clumping (MAF >= 1%, r^2 <= 0.1) & P<=5e-08	GRCh37	49	0	NR	PGP000118	32991828	10.1016/j.ajhg.2020.08.025	TRUE	European:100	European:100	European:100	https://ftp.ebi.ac.uk/pub/databases/spot/pgs/scores/PGS000494/ScoringFiles/PGS000494.txt.gz	PGS obtained from the Catalog should be cited appropriately, and used in accordance with any licensing restrictions set by the authors. See EBI Terms of Use (https://www.ebi.ac.uk/about/terms-of-use/) for additional details.
PGS000495	PRSWEB_PHECODE174.1_Onco-iCOGS-ER-negative-BRCA_LASSOSUM_MGI_20200608	Breast cancer (female)	breast carcinoma	EFO_0000305	Lassosum	s=0.5;Lambda=0.006952	GRCh37	18866	0	NR	PGP000118	32991828	10.1016/j.ajhg.2020.08.025	TRUE	European:100	European:100	European:100	https://ftp.ebi.ac.uk/pub/databases/spot/pgs/scores/PGS000495/ScoringFiles/PGS000495.txt.gz	PGS obtained from the Catalog should be cited appropriately, and used in accordance with any licensing restrictions set by the authors. See EBI Terms of Use (https://www.ebi.ac.uk/about/terms-of-use/) for additional details.
PGS000496	PRSWEB_PHECODE174.1_Onco-iCOGS-ER-negative-BRCA_LASSOSUM_UKB_20200608	Breast cancer (female)	breast carcinoma	EFO_0000305	Lassosum	s=0.9;Lambda=0.006952	GRCh37	41744	0	NR	PGP000118	32991828	10.1016/j.ajhg.2020.08.025	TRUE	European:100	European:100	European:100	https://ftp.ebi.ac.uk/pub/databases/spot/pgs/scores/PGS000496/ScoringFiles/PGS000496.txt.gz	PGS obtained from the Catalog should be cited appropriately, and used in accordance with any licensing restrictions set by the authors. See EBI Terms of Use (https://www.ebi.ac.uk/about/terms-of-use/) for additional details.
PGS000497	PRSWEB_PHECODE174.1_Onco-iCOGS-ER-positive-BRCA_P_5e-08_MGI_20200608	Breast cancer (female)	breast carcinoma	EFO_0000305	GWAS Hits	LD Clumping (MAF >= 1%, r^2 <= 0.1) & P<=5e-08	GRCh37	257	0	NR	PGP000118	32991828	10.1016/j.ajhg.2020.08.025	TRUE	European:100	European:100	European:100	https://ftp.ebi.ac.uk/pub/databases/spot/pgs/scores/PGS000497/ScoringFiles/PGS000497.txt.gz	PGS obtained from the Catalog should be cited appropriately, and used in accordance with any licensing restrictions set by the authors. See EBI Terms of Use (https://www.ebi.ac.uk/about/terms-of-use/) for additional details.
PGS000498	PRSWEB_PHECODE174.1_Onco-iCOGS-ER-positive-BRCA_P_5e-08_UKB_20200608	Breast cancer (female)	breast carcinoma	EFO_0000305	GWAS Hits	LD Clumping (MAF >= 1%, r^2 <= 0.1) & P<=5e-08	GRCh37	257	0	NR	PGP000118	32991828	10.1016/j.ajhg.2020.08.025	TRUE	European:100	European:100	European:100	https://ftp.ebi.ac.uk/pub/databases/spot/pgs/scores/PGS000498/ScoringFiles/PGS000498.txt.gz	PGS obtained from the Catalog should be cited appropriately, and used in accordance with any licensing restrictions set by the authors. See EBI Terms of Use (https://www.ebi.ac.uk/about/terms-of-use/) for additional details.
PGS000499	PRSWEB_PHECODE174.1_Onco-iCOGS-ER-positive-BRCA_PRS-CS_MGI_20200608	Breast cancer (female)	breast carcinoma	EFO_0000305	PRS-CS	Parameters = auto; LD reference (eur)	GRCh37	1119140	0	NR	PGP000118	32991828	10.1016/j.ajhg.2020.08.025	TRUE	European:100	European:100	European:100	https://ftp.ebi.ac.uk/pub/databases/spot/pgs/scores/PGS000499/ScoringFiles/PGS000499.txt.gz	PGS obtained from the Catalog should be cited appropriately, and used in accordance with any licensing restrictions set by the authors. See EBI Terms of Use (https://www.ebi.ac.uk/about/terms-of-use/) for additional details.
PGS000500	PRSWEB_PHECODE174.1_Onco-iCOGS-ER-positive-BRCA_PRS-CS_UKB_20200608	Breast cancer (female)	breast carcinoma	EFO_0000305	PRS-CS	Parameters = auto; LD reference (eur)	GRCh37	1120410	0	NR	PGP000118	32991828	10.1016/j.ajhg.2020.08.025	TRUE	European:100	European:100	European:100	https://ftp.ebi.ac.uk/pub/databases/spot/pgs/scores/PGS000500/ScoringFiles/PGS000500.txt.gz	PGS obtained from the Catalog should be cited appropriately, and used in accordance with any licensing restrictions set by the authors. See EBI Terms of Use (https://www.ebi.ac.uk/about/terms-of-use/) for additional details.
PGS000501	PRSWEB_PHECODE174.1_Onco-iCOGS-ER-positive-BRCA_PT_MGI_20200608	Breast cancer (female)	breast carcinoma	EFO_0000305	P&T	LD Clumping (MAF >= 1%, r^2 <= 0.1) & P<=7.94e-05	GRCh37	1142	0	NR	PGP000118	32991828	10.1016/j.ajhg.2020.08.025	TRUE	European:100	European:100	European:100	https://ftp.ebi.ac.uk/pub/databases/spot/pgs/scores/PGS000501/ScoringFiles/PGS000501.txt.gz	PGS obtained from the Catalog should be cited appropriately, and used in accordance with any licensing restrictions set by the authors. See EBI Terms of Use (https://www.ebi.ac.uk/about/terms-of-use/) for additional details.
PGS000502	PRSWEB_PHECODE174.1_Onco-iCOGS-ER-positive-BRCA_PT_UKB_20200608	Breast cancer (female)	breast carcinoma	EFO_0000305	P&T	LD Clumping (MAF >= 1%, r^2 <= 0.1) & P<=2.51e-05	GRCh37	747	0	NR	PGP000118	32991828	10.1016/j.ajhg.2020.08.025	TRUE	European:100	European:100	European:100	https://ftp.ebi.ac.uk/pub/databases/spot/pgs/scores/PGS000502/ScoringFiles/PGS000502.txt.gz	PGS obtained from the Catalog should be cited appropriately, and used in accordance with any licensing restrictions set by the authors. See EBI Terms of Use (https://www.ebi.ac.uk/about/terms-of-use/) for additional details.
PGS000503	PRSWEB_PHECODE174.1_Onco-iCOGS-ER-positive-BRCA_LASSOSUM_MGI_20200608	Breast cancer (female)	breast carcinoma	EFO_0000305	Lassosum	s=0.5;Lambda=0.008859	GRCh37	61635	0	NR	PGP000118	32991828	10.1016/j.ajhg.2020.08.025	TRUE	European:100	European:100	European:100	https://ftp.ebi.ac.uk/pub/databases/spot/pgs/scores/PGS000503/ScoringFiles/PGS000503.txt.gz	PGS obtained from the Catalog should be cited appropriately, and used in accordance with any licensing restrictions set by the authors. See EBI Terms of Use (https://www.ebi.ac.uk/about/terms-of-use/) for additional details.
PGS000504	PRSWEB_PHECODE174.1_Onco-iCOGS-ER-positive-BRCA_LASSOSUM_UKB_20200608	Breast cancer (female)	breast carcinoma	EFO_0000305	Lassosum	s=0.9;Lambda=0.008859	GRCh37	148560	0	NR	PGP000118	32991828	10.1016/j.ajhg.2020.08.025	TRUE	European:100	European:100	European:100	https://ftp.ebi.ac.uk/pub/databases/spot/pgs/scores/PGS000504/ScoringFiles/PGS000504.txt.gz	PGS obtained from the Catalog should be cited appropriately, and used in accordance with any licensing restrictions set by the authors. See EBI Terms of Use (https://www.ebi.ac.uk/about/terms-of-use/) for additional details.
PGS000505	PRSWEB_PHECODE174.1_Onco-iCOGS-Overall-BRCA_P_5e-08_MGI_20200608	Breast cancer (female)	breast carcinoma	EFO_0000305	GWAS Hits	LD Clumping (MAF >= 1%, r^2 <= 0.1) & P<=5e-08	GRCh37	334	0	NR	PGP000118	32991828	10.1016/j.ajhg.2020.08.025	TRUE	European:100	European:100	European:100	https://ftp.ebi.ac.uk/pub/databases/spot/pgs/scores/PGS000505/ScoringFiles/PGS000505.txt.gz	PGS obtained from the Catalog should be cited appropriately, and used in accordance with any licensing restrictions set by the authors. See EBI Terms of Use (https://www.ebi.ac.uk/about/terms-of-use/) for additional details.
PGS000506	PRSWEB_PHECODE174.1_Onco-iCOGS-Overall-BRCA_P_5e-08_UKB_20200608	Breast cancer (female)	breast carcinoma	EFO_0000305	GWAS Hits	LD Clumping (MAF >= 1%, r^2 <= 0.1) & P<=5e-08	GRCh37	334	0	NR	PGP000118	32991828	10.1016/j.ajhg.2020.08.025	TRUE	European:100	European:100	European:100	https://ftp.ebi.ac.uk/pub/databases/spot/pgs/scores/PGS000506/ScoringFiles/PGS000506.txt.gz	PGS obtained from the Catalog should be cited appropriately, and used in accordance with any licensing restrictions set by the authors. See EBI Terms of Use (https://www.ebi.ac.uk/about/terms-of-use/) for additional details.
PGS000507	PRSWEB_PHECODE174.1_Onco-iCOGS-Overall-BRCA_PRS-CS_MGI_20200608	Breast cancer (female)	breast carcinoma	EFO_0000305	PRS-CS	Parameters = auto; LD reference (eur)	GRCh37	1119140	0	NR	PGP000118	32991828	10.1016/j.ajhg.2020.08.025	TRUE	European:100	European:100	European:100	https://ftp.ebi.ac.uk/pub/databases/spot/pgs/scores/PGS000507/ScoringFiles/PGS000507.txt.gz	PGS obtained from the Catalog should be cited appropriately, and used in accordance with any licensing restrictions set by the authors. See EBI Terms of Use (https://www.ebi.ac.uk/about/terms-of-use/) for additional details.
PGS000508	PRSWEB_PHECODE174.1_Onco-iCOGS-Overall-BRCA_PRS-CS_UKB_20200608	Breast cancer (female)	breast carcinoma	EFO_0000305	PRS-CS	Parameters = auto; LD reference (eur)	GRCh37	1120410	0	NR	PGP000118	32991828	10.1016/j.ajhg.2020.08.025	TRUE	European:100	European:100	European:100	https://ftp.ebi.ac.uk/pub/databases/spot/pgs/scores/PGS000508/ScoringFiles/PGS000508.txt.gz	PGS obtained from the Catalog should be cited appropriately, and used in accordance with any licensing restrictions set by the authors. See EBI Terms of Use (https://www.ebi.ac.uk/about/terms-of-use/) for additional details.
PGS000509	PRSWEB_PHECODE174.1_Onco-iCOGS-Overall-BRCA_PT_MGI_20200608	Breast cancer (female)	breast carcinoma	EFO_0000305	P&T	LD Clumping (MAF >= 1%, r^2 <= 0.1) & P<=0.000398	GRCh37	3038	0	NR	PGP000118	32991828	10.1016/j.ajhg.2020.08.025	TRUE	European:100	European:100	European:100	https://ftp.ebi.ac.uk/pub/databases/spot/pgs/scores/PGS000509/ScoringFiles/PGS000509.txt.gz	PGS obtained from the Catalog should be cited appropriately, and used in accordance with any licensing restrictions set by the authors. See EBI Terms of Use (https://www.ebi.ac.uk/about/terms-of-use/) for additional details.
PGS000510	PRSWEB_PHECODE174.1_Onco-iCOGS-Overall-BRCA_PT_UKB_20200608	Breast cancer (female)	breast carcinoma	EFO_0000305	P&T	LD Clumping (MAF >= 1%, r^2 <= 0.1) & P<=1e-04	GRCh37	1682	0	NR	PGP000118	32991828	10.1016/j.ajhg.2020.08.025	TRUE	European:100	European:100	European:100	https://ftp.ebi.ac.uk/pub/databases/spot/pgs/scores/PGS000510/ScoringFiles/PGS000510.txt.gz	PGS obtained from the Catalog should be cited appropriately, and used in accordance with any licensing restrictions set by the authors. See EBI Terms of Use (https://www.ebi.ac.uk/about/terms-of-use/) for additional details.
PGS000511	PRSWEB_PHECODE174.1_Onco-iCOGS-Overall-BRCA_LASSOSUM_MGI_20200608	Breast cancer (female)	breast carcinoma	EFO_0000305	Lassosum	s=0.5;Lambda=0.004281	GRCh37	118388	0	NR	PGP000118	32991828	10.1016/j.ajhg.2020.08.025	TRUE	European:100	European:100	European:100	https://ftp.ebi.ac.uk/pub/databases/spot/pgs/scores/PGS000511/ScoringFiles/PGS000511.txt.gz	PGS obtained from the Catalog should be cited appropriately, and used in accordance with any licensing restrictions set by the authors. See EBI Terms of Use (https://www.ebi.ac.uk/about/terms-of-use/) for additional details.
PGS000512	PRSWEB_PHECODE174.1_Onco-iCOGS-Overall-BRCA_LASSOSUM_UKB_20200608	Breast cancer (female)	breast carcinoma	EFO_0000305	Lassosum	s=0.9;Lambda=0.004281	GRCh37	286144	0	NR	PGP000118	32991828	10.1016/j.ajhg.2020.08.025	TRUE	European:100	European:100	European:100	https://ftp.ebi.ac.uk/pub/databases/spot/pgs/scores/PGS000512/ScoringFiles/PGS000512.txt.gz	PGS obtained from the Catalog should be cited appropriately, and used in accordance with any licensing restrictions set by the authors. See EBI Terms of Use (https://www.ebi.ac.uk/about/terms-of-use/) for additional details.
PGS000513	PRSWEB_PHECODE174.1_UKBB-SAIGE-HRC-X174.1_P_5e-08_MGI_20200608	Breast cancer (female)	breast carcinoma	EFO_0000305	GWAS Hits	LD Clumping (MAF >= 1%, r^2 <= 0.1) & P<=5e-08	GRCh37	41	0	NR	PGP000118	32991828	10.1016/j.ajhg.2020.08.025	TRUE	European:100	European:100	European:100	https://ftp.ebi.ac.uk/pub/databases/spot/pgs/scores/PGS000513/ScoringFiles/PGS000513.txt.gz	PGS obtained from the Catalog should be cited appropriately, and used in accordance with any licensing restrictions set by the authors. See EBI Terms of Use (https://www.ebi.ac.uk/about/terms-of-use/) for additional details.
PGS000514	PRSWEB_PHECODE174.1_UKBB-SAIGE-HRC-X174.1_PRS-CS_MGI_20200608	Breast cancer (female)	breast carcinoma	EFO_0000305	PRS-CS	Parameters = auto; LD reference (eur)	GRCh37	1119237	0	NR	PGP000118	32991828	10.1016/j.ajhg.2020.08.025	TRUE	European:100	European:100	European:100	https://ftp.ebi.ac.uk/pub/databases/spot/pgs/scores/PGS000514/ScoringFiles/PGS000514.txt.gz	PGS obtained from the Catalog should be cited appropriately, and used in accordance with any licensing restrictions set by the authors. See EBI Terms of Use (https://www.ebi.ac.uk/about/terms-of-use/) for additional details.
PGS000515	PRSWEB_PHECODE174.1_UKBB-SAIGE-HRC-X174.1_PT_MGI_20200608	Breast cancer (female)	breast carcinoma	EFO_0000305	P&T	LD Clumping (MAF >= 1%, r^2 <= 0.1) & P<=1.58e-06	GRCh37	84	0	NR	PGP000118	32991828	10.1016/j.ajhg.2020.08.025	TRUE	European:100	European:100	European:100	https://ftp.ebi.ac.uk/pub/databases/spot/pgs/scores/PGS000515/ScoringFiles/PGS000515.txt.gz	PGS obtained from the Catalog should be cited appropriately, and used in accordance with any licensing restrictions set by the authors. See EBI Terms of Use (https://www.ebi.ac.uk/about/terms-of-use/) for additional details.
PGS000516	PRSWEB_PHECODE174.1_UKBB-SAIGE-HRC-X174.1_LASSOSUM_MGI_20200608	Breast cancer (female)	breast carcinoma	EFO_0000305	Lassosum	s=0.5;Lambda=0.01438	GRCh37	6977	0	NR	PGP000118	32991828	10.1016/j.ajhg.2020.08.025	TRUE	European:100	European:100	European:100	https://ftp.ebi.ac.uk/pub/databases/spot/pgs/scores/PGS000516/ScoringFiles/PGS000516.txt.gz	PGS obtained from the Catalog should be cited appropriately, and used in accordance with any licensing restrictions set by the authors. See EBI Terms of Use (https://www.ebi.ac.uk/about/terms-of-use/) for additional details.
PGS000517	PRSWEB_PHECODE174.1_iCOGS-ER-negative-BRCA_P_5e-08_MGI_20200608	Breast cancer (female)	breast carcinoma	EFO_0000305	GWAS Hits	LD Clumping (MAF >= 1%, r^2 <= 0.1) & P<=5e-08	GRCh37	10	0	NR	PGP000118	32991828	10.1016/j.ajhg.2020.08.025	TRUE	European:100	European:100	European:100	https://ftp.ebi.ac.uk/pub/databases/spot/pgs/scores/PGS000517/ScoringFiles/PGS000517.txt.gz	PGS obtained from the Catalog should be cited appropriately, and used in accordance with any licensing restrictions set by the authors. See EBI Terms of Use (https://www.ebi.ac.uk/about/terms-of-use/) for additional details.
PGS000518	PRSWEB_PHECODE174.1_iCOGS-ER-negative-BRCA_P_5e-08_UKB_20200608	Breast cancer (female)	breast carcinoma	EFO_0000305	GWAS Hits	LD Clumping (MAF >= 1%, r^2 <= 0.1) & P<=5e-08	GRCh37	10	0	NR	PGP000118	32991828	10.1016/j.ajhg.2020.08.025	TRUE	European:100	European:100	European:100	https://ftp.ebi.ac.uk/pub/databases/spot/pgs/scores/PGS000518/ScoringFiles/PGS000518.txt.gz	PGS obtained from the Catalog should be cited appropriately, and used in accordance with any licensing restrictions set by the authors. See EBI Terms of Use (https://www.ebi.ac.uk/about/terms-of-use/) for additional details.
PGS000519	PRSWEB_PHECODE174.1_iCOGS-ER-negative-BRCA_PRS-CS_MGI_20200608	Breast cancer (female)	breast carcinoma	EFO_0000305	PRS-CS	Parameters = auto; LD reference (eur)	GRCh37	1115376	0	NR	PGP000118	32991828	10.1016/j.ajhg.2020.08.025	TRUE	European:100	European:100	European:100	https://ftp.ebi.ac.uk/pub/databases/spot/pgs/scores/PGS000519/ScoringFiles/PGS000519.txt.gz	PGS obtained from the Catalog should be cited appropriately, and used in accordance with any licensing restrictions set by the authors. See EBI Terms of Use (https://www.ebi.ac.uk/about/terms-of-use/) for additional details.
PGS000520	PRSWEB_PHECODE174.1_iCOGS-ER-negative-BRCA_PRS-CS_UKB_20200608	Breast cancer (female)	breast carcinoma	EFO_0000305	PRS-CS	Parameters = auto; LD reference (eur)	GRCh37	1116435	0	NR	PGP000118	32991828	10.1016/j.ajhg.2020.08.025	TRUE	European:100	European:100	European:100	https://ftp.ebi.ac.uk/pub/databases/spot/pgs/scores/PGS000520/ScoringFiles/PGS000520.txt.gz	PGS obtained from the Catalog should be cited appropriately, and used in accordance with any licensing restrictions set by the authors. See EBI Terms of Use (https://www.ebi.ac.uk/about/terms-of-use/) for additional details.
PGS000521	PRSWEB_PHECODE174.1_iCOGS-ER-negative-BRCA_PT_MGI_20200608	Breast cancer (female)	breast carcinoma	EFO_0000305	P&T	LD Clumping (MAF >= 1%, r^2 <= 0.1) & P<=7.94e-09	GRCh37	9	0	NR	PGP000118	32991828	10.1016/j.ajhg.2020.08.025	TRUE	European:100	European:100	European:100	https://ftp.ebi.ac.uk/pub/databases/spot/pgs/scores/PGS000521/ScoringFiles/PGS000521.txt.gz	PGS obtained from the Catalog should be cited appropriately, and used in accordance with any licensing restrictions set by the authors. See EBI Terms of Use (https://www.ebi.ac.uk/about/terms-of-use/) for additional details.
PGS000522	PRSWEB_PHECODE174.1_iCOGS-ER-negative-BRCA_PT_UKB_20200608	Breast cancer (female)	breast carcinoma	EFO_0000305	P&T	LD Clumping (MAF >= 1%, r^2 <= 0.1) & P<=3.16e-07	GRCh37	14	0	NR	PGP000118	32991828	10.1016/j.ajhg.2020.08.025	TRUE	European:100	European:100	European:100	https://ftp.ebi.ac.uk/pub/databases/spot/pgs/scores/PGS000522/ScoringFiles/PGS000522.txt.gz	PGS obtained from the Catalog should be cited appropriately, and used in accordance with any licensing restrictions set by the authors. See EBI Terms of Use (https://www.ebi.ac.uk/about/terms-of-use/) for additional details.
PGS000523	PRSWEB_PHECODE174.1_iCOGS-ER-negative-BRCA_LASSOSUM_MGI_20200608	Breast cancer (female)	breast carcinoma	EFO_0000305	Lassosum	s=0.9;Lambda=0.01129	GRCh37	270	0	NR	PGP000118	32991828	10.1016/j.ajhg.2020.08.025	TRUE	European:100	European:100	European:100	https://ftp.ebi.ac.uk/pub/databases/spot/pgs/scores/PGS000523/ScoringFiles/PGS000523.txt.gz	PGS obtained from the Catalog should be cited appropriately, and used in accordance with any licensing restrictions set by the authors. See EBI Terms of Use (https://www.ebi.ac.uk/about/terms-of-use/) for additional details.
PGS000524	PRSWEB_PHECODE174.1_iCOGS-ER-negative-BRCA_LASSOSUM_UKB_20200608	Breast cancer (female)	breast carcinoma	EFO_0000305	Lassosum	s=0.9;Lambda=0.008859	GRCh37	2708	0	NR	PGP000118	32991828	10.1016/j.ajhg.2020.08.025	TRUE	European:100	European:100	European:100	https://ftp.ebi.ac.uk/pub/databases/spot/pgs/scores/PGS000524/ScoringFiles/PGS000524.txt.gz	PGS obtained from the Catalog should be cited appropriately, and used in accordance with any licensing restrictions set by the authors. See EBI Terms of Use (https://www.ebi.ac.uk/about/terms-of-use/) for additional details.
PGS000525	PRSWEB_PHECODE174.1_iCOGS-ER-positive-BRCA_P_5e-08_MGI_20200608	Breast cancer (female)	breast carcinoma	EFO_0000305	GWAS Hits	LD Clumping (MAF >= 1%, r^2 <= 0.1) & P<=5e-08	GRCh37	86	0	NR	PGP000118	32991828	10.1016/j.ajhg.2020.08.025	TRUE	European:100	European:100	European:100	https://ftp.ebi.ac.uk/pub/databases/spot/pgs/scores/PGS000525/ScoringFiles/PGS000525.txt.gz	PGS obtained from the Catalog should be cited appropriately, and used in accordance with any licensing restrictions set by the authors. See EBI Terms of Use (https://www.ebi.ac.uk/about/terms-of-use/) for additional details.
PGS000526	PRSWEB_PHECODE174.1_iCOGS-ER-positive-BRCA_P_5e-08_UKB_20200608	Breast cancer (female)	breast carcinoma	EFO_0000305	GWAS Hits	LD Clumping (MAF >= 1%, r^2 <= 0.1) & P<=5e-08	GRCh37	86	0	NR	PGP000118	32991828	10.1016/j.ajhg.2020.08.025	TRUE	European:100	European:100	European:100	https://ftp.ebi.ac.uk/pub/databases/spot/pgs/scores/PGS000526/ScoringFiles/PGS000526.txt.gz	PGS obtained from the Catalog should be cited appropriately, and used in accordance with any licensing restrictions set by the authors. See EBI Terms of Use (https://www.ebi.ac.uk/about/terms-of-use/) for additional details.
PGS000527	PRSWEB_PHECODE174.1_iCOGS-ER-positive-BRCA_PRS-CS_MGI_20200608	Breast cancer (female)	breast carcinoma	EFO_0000305	PRS-CS	Parameters = auto; LD reference (eur)	GRCh37	1115436	0	NR	PGP000118	32991828	10.1016/j.ajhg.2020.08.025	TRUE	European:100	European:100	European:100	https://ftp.ebi.ac.uk/pub/databases/spot/pgs/scores/PGS000527/ScoringFiles/PGS000527.txt.gz	PGS obtained from the Catalog should be cited appropriately, and used in accordance with any licensing restrictions set by the authors. See EBI Terms of Use (https://www.ebi.ac.uk/about/terms-of-use/) for additional details.
PGS000528	PRSWEB_PHECODE174.1_iCOGS-ER-positive-BRCA_PRS-CS_UKB_20200608	Breast cancer (female)	breast carcinoma	EFO_0000305	PRS-CS	Parameters = auto; LD reference (eur)	GRCh37	1116495	0	NR	PGP000118	32991828	10.1016/j.ajhg.2020.08.025	TRUE	European:100	European:100	European:100	https://ftp.ebi.ac.uk/pub/databases/spot/pgs/scores/PGS000528/ScoringFiles/PGS000528.txt.gz	PGS obtained from the Catalog should be cited appropriately, and used in accordance with any licensing restrictions set by the authors. See EBI Terms of Use (https://www.ebi.ac.uk/about/terms-of-use/) for additional details.
PGS000529	PRSWEB_PHECODE174.1_iCOGS-ER-positive-BRCA_PT_MGI_20200608	Breast cancer (female)	breast carcinoma	EFO_0000305	P&T	LD Clumping (MAF >= 1%, r^2 <= 0.1) & P<=2.51e-05	GRCh37	310	0	NR	PGP000118	32991828	10.1016/j.ajhg.2020.08.025	TRUE	European:100	European:100	European:100	https://ftp.ebi.ac.uk/pub/databases/spot/pgs/scores/PGS000529/ScoringFiles/PGS000529.txt.gz	PGS obtained from the Catalog should be cited appropriately, and used in accordance with any licensing restrictions set by the authors. See EBI Terms of Use (https://www.ebi.ac.uk/about/terms-of-use/) for additional details.
PGS000530	PRSWEB_PHECODE174.1_iCOGS-ER-positive-BRCA_PT_UKB_20200608	Breast cancer (female)	breast carcinoma	EFO_0000305	P&T	LD Clumping (MAF >= 1%, r^2 <= 0.1) & P<=3.98e-06	GRCh37	174	0	NR	PGP000118	32991828	10.1016/j.ajhg.2020.08.025	TRUE	European:100	European:100	European:100	https://ftp.ebi.ac.uk/pub/databases/spot/pgs/scores/PGS000530/ScoringFiles/PGS000530.txt.gz	PGS obtained from the Catalog should be cited appropriately, and used in accordance with any licensing restrictions set by the authors. See EBI Terms of Use (https://www.ebi.ac.uk/about/terms-of-use/) for additional details.
PGS000531	PRSWEB_PHECODE174.1_iCOGS-ER-positive-BRCA_LASSOSUM_MGI_20200608	Breast cancer (female)	breast carcinoma	EFO_0000305	Lassosum	s=0.9;Lambda=0.008859	GRCh37	98026	0	NR	PGP000118	32991828	10.1016/j.ajhg.2020.08.025	TRUE	European:100	European:100	European:100	https://ftp.ebi.ac.uk/pub/databases/spot/pgs/scores/PGS000531/ScoringFiles/PGS000531.txt.gz	PGS obtained from the Catalog should be cited appropriately, and used in accordance with any licensing restrictions set by the authors. See EBI Terms of Use (https://www.ebi.ac.uk/about/terms-of-use/) for additional details.
PGS000532	PRSWEB_PHECODE174.1_iCOGS-ER-positive-BRCA_LASSOSUM_UKB_20200608	Breast cancer (female)	breast carcinoma	EFO_0000305	Lassosum	s=0.5;Lambda=0.01129	GRCh37	12277	0	NR	PGP000118	32991828	10.1016/j.ajhg.2020.08.025	TRUE	European:100	European:100	European:100	https://ftp.ebi.ac.uk/pub/databases/spot/pgs/scores/PGS000532/ScoringFiles/PGS000532.txt.gz	PGS obtained from the Catalog should be cited appropriately, and used in accordance with any licensing restrictions set by the authors. See EBI Terms of Use (https://www.ebi.ac.uk/about/terms-of-use/) for additional details.
PGS000533	PRSWEB_PHECODE174.1_iCOGS-Overall-BRCA_P_5e-08_MGI_20200608	Breast cancer (female)	breast carcinoma	EFO_0000305	GWAS Hits	LD Clumping (MAF >= 1%, r^2 <= 0.1) & P<=5e-08	GRCh37	110	0	NR	PGP000118	32991828	10.1016/j.ajhg.2020.08.025	TRUE	European:100	European:100	European:100	https://ftp.ebi.ac.uk/pub/databases/spot/pgs/scores/PGS000533/ScoringFiles/PGS000533.txt.gz	PGS obtained from the Catalog should be cited appropriately, and used in accordance with any licensing restrictions set by the authors. See EBI Terms of Use (https://www.ebi.ac.uk/about/terms-of-use/) for additional details.
PGS000534	PRSWEB_PHECODE174.1_iCOGS-Overall-BRCA_P_5e-08_UKB_20200608	Breast cancer (female)	breast carcinoma	EFO_0000305	GWAS Hits	LD Clumping (MAF >= 1%, r^2 <= 0.1) & P<=5e-08	GRCh37	110	0	NR	PGP000118	32991828	10.1016/j.ajhg.2020.08.025	TRUE	European:100	European:100	European:100	https://ftp.ebi.ac.uk/pub/databases/spot/pgs/scores/PGS000534/ScoringFiles/PGS000534.txt.gz	PGS obtained from the Catalog should be cited appropriately, and used in accordance with any licensing restrictions set by the authors. See EBI Terms of Use (https://www.ebi.ac.uk/about/terms-of-use/) for additional details.
PGS000535	PRSWEB_PHECODE174.1_iCOGS-Overall-BRCA_PRS-CS_MGI_20200608	Breast cancer (female)	breast carcinoma	EFO_0000305	PRS-CS	Parameters = auto; LD reference (eur)	GRCh37	1115484	0	NR	PGP000118	32991828	10.1016/j.ajhg.2020.08.025	TRUE	European:100	European:100	European:100	https://ftp.ebi.ac.uk/pub/databases/spot/pgs/scores/PGS000535/ScoringFiles/PGS000535.txt.gz	PGS obtained from the Catalog should be cited appropriately, and used in accordance with any licensing restrictions set by the authors. See EBI Terms of Use (https://www.ebi.ac.uk/about/terms-of-use/) for additional details.
PGS000536	PRSWEB_PHECODE174.1_iCOGS-Overall-BRCA_PRS-CS_UKB_20200608	Breast cancer (female)	breast carcinoma	EFO_0000305	PRS-CS	Parameters = auto; LD reference (eur)	GRCh37	1116546	0	NR	PGP000118	32991828	10.1016/j.ajhg.2020.08.025	TRUE	European:100	European:100	European:100	https://ftp.ebi.ac.uk/pub/databases/spot/pgs/scores/PGS000536/ScoringFiles/PGS000536.txt.gz	PGS obtained from the Catalog should be cited appropriately, and used in accordance with any licensing restrictions set by the authors. See EBI Terms of Use (https://www.ebi.ac.uk/about/terms-of-use/) for additional details.
PGS000537	PRSWEB_PHECODE174.1_iCOGS-Overall-BRCA_PT_MGI_20200608	Breast cancer (female)	breast carcinoma	EFO_0000305	P&T	LD Clumping (MAF >= 1%, r^2 <= 0.1) & P<=2e-05	GRCh37	363	0	NR	PGP000118	32991828	10.1016/j.ajhg.2020.08.025	TRUE	European:100	European:100	European:100	https://ftp.ebi.ac.uk/pub/databases/spot/pgs/scores/PGS000537/ScoringFiles/PGS000537.txt.gz	PGS obtained from the Catalog should be cited appropriately, and used in accordance with any licensing restrictions set by the authors. See EBI Terms of Use (https://www.ebi.ac.uk/about/terms-of-use/) for additional details.
PGS000538	PRSWEB_PHECODE174.1_iCOGS-Overall-BRCA_PT_UKB_20200608	Breast cancer (female)	breast carcinoma	EFO_0000305	P&T	LD Clumping (MAF >= 1%, r^2 <= 0.1) & P<=1e-08	GRCh37	85	0	NR	PGP000118	32991828	10.1016/j.ajhg.2020.08.025	TRUE	European:100	European:100	European:100	https://ftp.ebi.ac.uk/pub/databases/spot/pgs/scores/PGS000538/ScoringFiles/PGS000538.txt.gz	PGS obtained from the Catalog should be cited appropriately, and used in accordance with any licensing restrictions set by the authors. See EBI Terms of Use (https://www.ebi.ac.uk/about/terms-of-use/) for additional details.
PGS000539	PRSWEB_PHECODE174.1_iCOGS-Overall-BRCA_LASSOSUM_MGI_20200608	Breast cancer (female)	breast carcinoma	EFO_0000305	Lassosum	s=0.5;Lambda=0.008859	GRCh37	18356	0	NR	PGP000118	32991828	10.1016/j.ajhg.2020.08.025	TRUE	European:100	European:100	European:100	https://ftp.ebi.ac.uk/pub/databases/spot/pgs/scores/PGS000539/ScoringFiles/PGS000539.txt.gz	PGS obtained from the Catalog should be cited appropriately, and used in accordance with any licensing restrictions set by the authors. See EBI Terms of Use (https://www.ebi.ac.uk/about/terms-of-use/) for additional details.
PGS000540	PRSWEB_PHECODE174.1_iCOGS-Overall-BRCA_LASSOSUM_UKB_20200608	Breast cancer (female)	breast carcinoma	EFO_0000305	Lassosum	s=0.5;Lambda=0.006952	GRCh37	7118	0	NR	PGP000118	32991828	10.1016/j.ajhg.2020.08.025	TRUE	European:100	European:100	European:100	https://ftp.ebi.ac.uk/pub/databases/spot/pgs/scores/PGS000540/ScoringFiles/PGS000540.txt.gz	PGS obtained from the Catalog should be cited appropriately, and used in accordance with any licensing restrictions set by the authors. See EBI Terms of Use (https://www.ebi.ac.uk/about/terms-of-use/) for additional details.
PGS000541	PRSWEB_PHECODE182_GWAS-Catalog-r2019-05-03-X182_P_5e-08_UKB_20200608	Malignant neoplasm of uterus	uterine cancer	MONDO_0002715	GWAS Hits	LD Clumping (MAF >= 1%, r^2 <= 0.1) & P<=5e-08	GRCh37	18	0	NR	PGP000118	32991828	10.1016/j.ajhg.2020.08.025	TRUE	European:100	European:100	European:100	https://ftp.ebi.ac.uk/pub/databases/spot/pgs/scores/PGS000541/ScoringFiles/PGS000541.txt.gz	PGS obtained from the Catalog should be cited appropriately, and used in accordance with any licensing restrictions set by the authors. See EBI Terms of Use (https://www.ebi.ac.uk/about/terms-of-use/) for additional details.
PGS000542	PRSWEB_PHECODE182_GWAS-Catalog-r2019-05-03-X182_PT_UKB_20200608	Malignant neoplasm of uterus	uterine cancer	MONDO_0002715	P&T	LD Clumping (MAF >= 1%, r^2 <= 0.1) & P<=1e-07	GRCh37	20	0	NR	PGP000118	32991828	10.1016/j.ajhg.2020.08.025	TRUE	European:100	European:100	European:100	https://ftp.ebi.ac.uk/pub/databases/spot/pgs/scores/PGS000542/ScoringFiles/PGS000542.txt.gz	PGS obtained from the Catalog should be cited appropriately, and used in accordance with any licensing restrictions set by the authors. See EBI Terms of Use (https://www.ebi.ac.uk/about/terms-of-use/) for additional details.
PGS000543	PRSWEB_PHECODE184_C3-FEMALE-GENITAL_PT_MGI_20200608	Cancer of other female genital organs	female reproductive system neoplasm	MONDO_0021148	P&T	LD Clumping (MAF >= 1%, r^2 <= 0.1) & P<=2e-06	GRCh37	8	0	NR	PGP000118	32991828	10.1016/j.ajhg.2020.08.025	TRUE	European:100	European:100	European:100	https://ftp.ebi.ac.uk/pub/databases/spot/pgs/scores/PGS000543/ScoringFiles/PGS000543.txt.gz	PGS obtained from the Catalog should be cited appropriately, and used in accordance with any licensing restrictions set by the authors. See EBI Terms of Use (https://www.ebi.ac.uk/about/terms-of-use/) for additional details.
PGS000544	PRSWEB_PHECODE184.11_GWAS-Catalog-r2019-05-03-X184.11_P_5e-08_UKB_20200608	Malignant neoplasm of ovary	ovarian neoplasm	EFO_0003893	GWAS Hits	LD Clumping (MAF >= 1%, r^2 <= 0.1) & P<=5e-08	GRCh37	21	0	NR	PGP000118	32991828	10.1016/j.ajhg.2020.08.025	TRUE	European:100	European:100	European:100	https://ftp.ebi.ac.uk/pub/databases/spot/pgs/scores/PGS000544/ScoringFiles/PGS000544.txt.gz	PGS obtained from the Catalog should be cited appropriately, and used in accordance with any licensing restrictions set by the authors. See EBI Terms of Use (https://www.ebi.ac.uk/about/terms-of-use/) for additional details.
PGS000545	PRSWEB_PHECODE184.11_GWAS-Catalog-r2019-05-03-X184.11_PT_UKB_20200608	Malignant neoplasm of ovary	ovarian neoplasm	EFO_0003893	P&T	LD Clumping (MAF >= 1%, r^2 <= 0.1) & P<=5e-08	GRCh37	21	0	NR	PGP000118	32991828	10.1016/j.ajhg.2020.08.025	TRUE	European:100	European:100	European:100	https://ftp.ebi.ac.uk/pub/databases/spot/pgs/scores/PGS000545/ScoringFiles/PGS000545.txt.gz	PGS obtained from the Catalog should be cited appropriately, and used in accordance with any licensing restrictions set by the authors. See EBI Terms of Use (https://www.ebi.ac.uk/about/terms-of-use/) for additional details.
PGS000546	PRSWEB_PHECODE184.11_Phelan-ENOC_PRS-CS_UKB_20200608	Malignant neoplasm of ovary	ovarian neoplasm	EFO_0003893	PRS-CS	Parameters = auto; LD reference (eur)	GRCh37	1115189	0	NR	PGP000118	32991828	10.1016/j.ajhg.2020.08.025	TRUE	European:100	European:100	European:100	https://ftp.ebi.ac.uk/pub/databases/spot/pgs/scores/PGS000546/ScoringFiles/PGS000546.txt.gz	PGS obtained from the Catalog should be cited appropriately, and used in accordance with any licensing restrictions set by the authors. See EBI Terms of Use (https://www.ebi.ac.uk/about/terms-of-use/) for additional details.
PGS000547	PRSWEB_PHECODE184.11_Phelan-EPOC_P_5e-08_UKB_20200608	Malignant neoplasm of ovary	ovarian neoplasm	EFO_0003893	GWAS Hits	LD Clumping (MAF >= 1%, r^2 <= 0.1) & P<=5e-08	GRCh37	6	0	NR	PGP000118	32991828	10.1016/j.ajhg.2020.08.025	TRUE	European:100	European:100	European:100	https://ftp.ebi.ac.uk/pub/databases/spot/pgs/scores/PGS000547/ScoringFiles/PGS000547.txt.gz	PGS obtained from the Catalog should be cited appropriately, and used in accordance with any licensing restrictions set by the authors. See EBI Terms of Use (https://www.ebi.ac.uk/about/terms-of-use/) for additional details.
PGS000548	PRSWEB_PHECODE184.11_Phelan-EPOC_LASSOSUM_UKB_20200608	Malignant neoplasm of ovary	ovarian neoplasm	EFO_0003893	Lassosum	s=0.5;Lambda=0.01438	GRCh37	1441	0	NR	PGP000118	32991828	10.1016/j.ajhg.2020.08.025	TRUE	European:100	European:100	European:100	https://ftp.ebi.ac.uk/pub/databases/spot/pgs/scores/PGS000548/ScoringFiles/PGS000548.txt.gz	PGS obtained from the Catalog should be cited appropriately, and used in accordance with any licensing restrictions set by the authors. See EBI Terms of Use (https://www.ebi.ac.uk/about/terms-of-use/) for additional details.
PGS000549	PRSWEB_PHECODE184.11_Phelan-IEOC_P_5e-08_UKB_20200608	Malignant neoplasm of ovary	ovarian neoplasm	EFO_0003893	GWAS Hits	LD Clumping (MAF >= 1%, r^2 <= 0.1) & P<=5e-08	GRCh37	16	0	NR	PGP000118	32991828	10.1016/j.ajhg.2020.08.025	TRUE	European:100	European:100	European:100	https://ftp.ebi.ac.uk/pub/databases/spot/pgs/scores/PGS000549/ScoringFiles/PGS000549.txt.gz	PGS obtained from the Catalog should be cited appropriately, and used in accordance with any licensing restrictions set by the authors. See EBI Terms of Use (https://www.ebi.ac.uk/about/terms-of-use/) for additional details.
PGS000550	PRSWEB_PHECODE184.11_Phelan-IEOC_PRS-CS_UKB_20200608	Malignant neoplasm of ovary	ovarian neoplasm	EFO_0003893	PRS-CS	Parameters = auto; LD reference (eur)	GRCh37	1115189	0	NR	PGP000118	32991828	10.1016/j.ajhg.2020.08.025	TRUE	European:100	European:100	European:100	https://ftp.ebi.ac.uk/pub/databases/spot/pgs/scores/PGS000550/ScoringFiles/PGS000550.txt.gz	PGS obtained from the Catalog should be cited appropriately, and used in accordance with any licensing restrictions set by the authors. See EBI Terms of Use (https://www.ebi.ac.uk/about/terms-of-use/) for additional details.
PGS000551	PRSWEB_PHECODE184.11_Phelan-IEOC_PT_UKB_20200608	Malignant neoplasm of ovary	ovarian neoplasm	EFO_0003893	P&T	LD Clumping (MAF >= 1%, r^2 <= 0.1) & P<=1.26e-09	GRCh37	12	0	NR	PGP000118	32991828	10.1016/j.ajhg.2020.08.025	TRUE	European:100	European:100	European:100	https://ftp.ebi.ac.uk/pub/databases/spot/pgs/scores/PGS000551/ScoringFiles/PGS000551.txt.gz	PGS obtained from the Catalog should be cited appropriately, and used in accordance with any licensing restrictions set by the authors. See EBI Terms of Use (https://www.ebi.ac.uk/about/terms-of-use/) for additional details.
PGS000552	PRSWEB_PHECODE184.11_Phelan-IEOC_LASSOSUM_UKB_20200608	Malignant neoplasm of ovary	ovarian neoplasm	EFO_0003893	Lassosum	s=0.9;Lambda=0.01129	GRCh37	41269	0	NR	PGP000118	32991828	10.1016/j.ajhg.2020.08.025	TRUE	European:100	European:100	European:100	https://ftp.ebi.ac.uk/pub/databases/spot/pgs/scores/PGS000552/ScoringFiles/PGS000552.txt.gz	PGS obtained from the Catalog should be cited appropriately, and used in accordance with any licensing restrictions set by the authors. See EBI Terms of Use (https://www.ebi.ac.uk/about/terms-of-use/) for additional details.
PGS000553	PRSWEB_PHECODE184.11_Phelan-LSASBOC_P_5e-08_UKB_20200608	Malignant neoplasm of ovary	ovarian neoplasm	EFO_0003893	GWAS Hits	LD Clumping (MAF >= 1%, r^2 <= 0.1) & P<=5e-08	GRCh37	10	0	NR	PGP000118	32991828	10.1016/j.ajhg.2020.08.025	TRUE	European:100	European:100	European:100	https://ftp.ebi.ac.uk/pub/databases/spot/pgs/scores/PGS000553/ScoringFiles/PGS000553.txt.gz	PGS obtained from the Catalog should be cited appropriately, and used in accordance with any licensing restrictions set by the authors. See EBI Terms of Use (https://www.ebi.ac.uk/about/terms-of-use/) for additional details.
PGS000554	PRSWEB_PHECODE184.11_Phelan-LSASBOC_PRS-CS_UKB_20200608	Malignant neoplasm of ovary	ovarian neoplasm	EFO_0003893	PRS-CS	Parameters = auto; LD reference (eur)	GRCh37	1115189	0	NR	PGP000118	32991828	10.1016/j.ajhg.2020.08.025	TRUE	European:100	European:100	European:100	https://ftp.ebi.ac.uk/pub/databases/spot/pgs/scores/PGS000554/ScoringFiles/PGS000554.txt.gz	PGS obtained from the Catalog should be cited appropriately, and used in accordance with any licensing restrictions set by the authors. See EBI Terms of Use (https://www.ebi.ac.uk/about/terms-of-use/) for additional details.
PGS000555	PRSWEB_PHECODE184.11_Phelan-LSASBOC_PT_UKB_20200608	Malignant neoplasm of ovary	ovarian neoplasm	EFO_0003893	P&T	LD Clumping (MAF >= 1%, r^2 <= 0.1) & P<=1.58e-06	GRCh37	15	0	NR	PGP000118	32991828	10.1016/j.ajhg.2020.08.025	TRUE	European:100	European:100	European:100	https://ftp.ebi.ac.uk/pub/databases/spot/pgs/scores/PGS000555/ScoringFiles/PGS000555.txt.gz	PGS obtained from the Catalog should be cited appropriately, and used in accordance with any licensing restrictions set by the authors. See EBI Terms of Use (https://www.ebi.ac.uk/about/terms-of-use/) for additional details.
PGS000556	PRSWEB_PHECODE184.11_Phelan-LSASBOC_LASSOSUM_UKB_20200608	Malignant neoplasm of ovary	ovarian neoplasm	EFO_0003893	Lassosum	s=0.2;Lambda=0.008859	GRCh37	486841	0	NR	PGP000118	32991828	10.1016/j.ajhg.2020.08.025	TRUE	European:100	European:100	European:100	https://ftp.ebi.ac.uk/pub/databases/spot/pgs/scores/PGS000556/ScoringFiles/PGS000556.txt.gz	PGS obtained from the Catalog should be cited appropriately, and used in accordance with any licensing restrictions set by the authors. See EBI Terms of Use (https://www.ebi.ac.uk/about/terms-of-use/) for additional details.
PGS000557	PRSWEB_PHECODE184.11_Phelan-OCCC_PRS-CS_UKB_20200608	Malignant neoplasm of ovary	ovarian neoplasm	EFO_0003893	PRS-CS	Parameters = auto; LD reference (eur)	GRCh37	1115187	0	NR	PGP000118	32991828	10.1016/j.ajhg.2020.08.025	TRUE	European:100	European:100	European:100	https://ftp.ebi.ac.uk/pub/databases/spot/pgs/scores/PGS000557/ScoringFiles/PGS000557.txt.gz	PGS obtained from the Catalog should be cited appropriately, and used in accordance with any licensing restrictions set by the authors. See EBI Terms of Use (https://www.ebi.ac.uk/about/terms-of-use/) for additional details.
PGS000558	PRSWEB_PHECODE184.11_Phelan-OCCC_LASSOSUM_UKB_20200608	Malignant neoplasm of ovary	ovarian neoplasm	EFO_0003893	Lassosum	s=0.2;Lambda=0.006952	GRCh37	1098236	0	NR	PGP000118	32991828	10.1016/j.ajhg.2020.08.025	TRUE	European:100	European:100	European:100	https://ftp.ebi.ac.uk/pub/databases/spot/pgs/scores/PGS000558/ScoringFiles/PGS000558.txt.gz	PGS obtained from the Catalog should be cited appropriately, and used in accordance with any licensing restrictions set by the authors. See EBI Terms of Use (https://www.ebi.ac.uk/about/terms-of-use/) for additional details.
PGS000559	PRSWEB_PHECODE184.11_Phelan-SIOC_P_5e-08_MGI_20200608	Malignant neoplasm of ovary	ovarian neoplasm	EFO_0003893	GWAS Hits	LD Clumping (MAF >= 1%, r^2 <= 0.1) & P<=5e-08	GRCh37	21	0	NR	PGP000118	32991828	10.1016/j.ajhg.2020.08.025	TRUE	European:100	European:100	European:100	https://ftp.ebi.ac.uk/pub/databases/spot/pgs/scores/PGS000559/ScoringFiles/PGS000559.txt.gz	PGS obtained from the Catalog should be cited appropriately, and used in accordance with any licensing restrictions set by the authors. See EBI Terms of Use (https://www.ebi.ac.uk/about/terms-of-use/) for additional details.
PGS000560	PRSWEB_PHECODE184.11_Phelan-SIOC_P_5e-08_UKB_20200608	Malignant neoplasm of ovary	ovarian neoplasm	EFO_0003893	GWAS Hits	LD Clumping (MAF >= 1%, r^2 <= 0.1) & P<=5e-08	GRCh37	21	0	NR	PGP000118	32991828	10.1016/j.ajhg.2020.08.025	TRUE	European:100	European:100	European:100	https://ftp.ebi.ac.uk/pub/databases/spot/pgs/scores/PGS000560/ScoringFiles/PGS000560.txt.gz	PGS obtained from the Catalog should be cited appropriately, and used in accordance with any licensing restrictions set by the authors. See EBI Terms of Use (https://www.ebi.ac.uk/about/terms-of-use/) for additional details.
PGS000561	PRSWEB_PHECODE184.11_Phelan-SIOC_PRS-CS_MGI_20200608	Malignant neoplasm of ovary	ovarian neoplasm	EFO_0003893	PRS-CS	Parameters = auto; LD reference (eur)	GRCh37	1114056	0	NR	PGP000118	32991828	10.1016/j.ajhg.2020.08.025	TRUE	European:100	European:100	European:100	https://ftp.ebi.ac.uk/pub/databases/spot/pgs/scores/PGS000561/ScoringFiles/PGS000561.txt.gz	PGS obtained from the Catalog should be cited appropriately, and used in accordance with any licensing restrictions set by the authors. See EBI Terms of Use (https://www.ebi.ac.uk/about/terms-of-use/) for additional details.
PGS000562	PRSWEB_PHECODE184.11_Phelan-SIOC_PRS-CS_UKB_20200608	Malignant neoplasm of ovary	ovarian neoplasm	EFO_0003893	PRS-CS	Parameters = auto; LD reference (eur)	GRCh37	1115189	0	NR	PGP000118	32991828	10.1016/j.ajhg.2020.08.025	TRUE	European:100	European:100	European:100	https://ftp.ebi.ac.uk/pub/databases/spot/pgs/scores/PGS000562/ScoringFiles/PGS000562.txt.gz	PGS obtained from the Catalog should be cited appropriately, and used in accordance with any licensing restrictions set by the authors. See EBI Terms of Use (https://www.ebi.ac.uk/about/terms-of-use/) for additional details.
PGS000563	PRSWEB_PHECODE184.11_Phelan-SIOC_PT_UKB_20200608	Malignant neoplasm of ovary	ovarian neoplasm	EFO_0003893	P&T	LD Clumping (MAF >= 1%, r^2 <= 0.1) & P<=6.31e-11	GRCh37	12	0	NR	PGP000118	32991828	10.1016/j.ajhg.2020.08.025	TRUE	European:100	European:100	European:100	https://ftp.ebi.ac.uk/pub/databases/spot/pgs/scores/PGS000563/ScoringFiles/PGS000563.txt.gz	PGS obtained from the Catalog should be cited appropriately, and used in accordance with any licensing restrictions set by the authors. See EBI Terms of Use (https://www.ebi.ac.uk/about/terms-of-use/) for additional details.
PGS000564	PRSWEB_PHECODE184.11_Phelan-SIOC_LASSOSUM_UKB_20200608	Malignant neoplasm of ovary	ovarian neoplasm	EFO_0003893	Lassosum	s=0.9;Lambda=0.01129	GRCh37	110710	0	NR	PGP000118	32991828	10.1016/j.ajhg.2020.08.025	TRUE	European:100	European:100	European:100	https://ftp.ebi.ac.uk/pub/databases/spot/pgs/scores/PGS000564/ScoringFiles/PGS000564.txt.gz	PGS obtained from the Catalog should be cited appropriately, and used in accordance with any licensing restrictions set by the authors. See EBI Terms of Use (https://www.ebi.ac.uk/about/terms-of-use/) for additional details.
PGS000565	PRSWEB_PHECODE185_20001-1044_P_5e-08_MGI_20200608	Cancer of prostate	prostate carcinoma	EFO_0001663	GWAS Hits	LD Clumping (MAF >= 1%, r^2 <= 0.1) & P<=5e-08	GRCh37	21	0	NR	PGP000118	32991828	10.1016/j.ajhg.2020.08.025	TRUE	European:100	European:100	European:100	https://ftp.ebi.ac.uk/pub/databases/spot/pgs/scores/PGS000565/ScoringFiles/PGS000565.txt.gz	PGS obtained from the Catalog should be cited appropriately, and used in accordance with any licensing restrictions set by the authors. See EBI Terms of Use (https://www.ebi.ac.uk/about/terms-of-use/) for additional details.
PGS000566	PRSWEB_PHECODE185_20001-1044_PRS-CS_MGI_20200608	Cancer of prostate	prostate carcinoma	EFO_0001663	PRS-CS	Parameters = auto; LD reference (eur)	GRCh37	1111494	0	NR	PGP000118	32991828	10.1016/j.ajhg.2020.08.025	TRUE	European:100	European:100	European:100	https://ftp.ebi.ac.uk/pub/databases/spot/pgs/scores/PGS000566/ScoringFiles/PGS000566.txt.gz	PGS obtained from the Catalog should be cited appropriately, and used in accordance with any licensing restrictions set by the authors. See EBI Terms of Use (https://www.ebi.ac.uk/about/terms-of-use/) for additional details.
PGS000567	PRSWEB_PHECODE185_20001-1044_PT_MGI_20200608	Cancer of prostate	prostate carcinoma	EFO_0001663	P&T	LD Clumping (MAF >= 1%, r^2 <= 0.1) & P<=1e-05	GRCh37	78	0	NR	PGP000118	32991828	10.1016/j.ajhg.2020.08.025	TRUE	European:100	European:100	European:100	https://ftp.ebi.ac.uk/pub/databases/spot/pgs/scores/PGS000567/ScoringFiles/PGS000567.txt.gz	PGS obtained from the Catalog should be cited appropriately, and used in accordance with any licensing restrictions set by the authors. See EBI Terms of Use (https://www.ebi.ac.uk/about/terms-of-use/) for additional details.
PGS000568	PRSWEB_PHECODE185_20001-1044_LASSOSUM_MGI_20200608	Cancer of prostate	prostate carcinoma	EFO_0001663	Lassosum	s=0.9;Lambda=0.03793	GRCh37	1401	0	NR	PGP000118	32991828	10.1016/j.ajhg.2020.08.025	TRUE	European:100	European:100	European:100	https://ftp.ebi.ac.uk/pub/databases/spot/pgs/scores/PGS000568/ScoringFiles/PGS000568.txt.gz	PGS obtained from the Catalog should be cited appropriately, and used in accordance with any licensing restrictions set by the authors. See EBI Terms of Use (https://www.ebi.ac.uk/about/terms-of-use/) for additional details.
PGS000569	PRSWEB_PHECODE185_C3-PROSTATE_P_5e-08_MGI_20200608	Cancer of prostate	prostate carcinoma	EFO_0001663	GWAS Hits	LD Clumping (MAF >= 1%, r^2 <= 0.1) & P<=5e-08	GRCh37	49	0	NR	PGP000118	32991828	10.1016/j.ajhg.2020.08.025	TRUE	European:100	European:100	European:100	https://ftp.ebi.ac.uk/pub/databases/spot/pgs/scores/PGS000569/ScoringFiles/PGS000569.txt.gz	PGS obtained from the Catalog should be cited appropriately, and used in accordance with any licensing restrictions set by the authors. See EBI Terms of Use (https://www.ebi.ac.uk/about/terms-of-use/) for additional details.
PGS000570	PRSWEB_PHECODE185_C3-PROSTATE_PRS-CS_MGI_20200608	Cancer of prostate	prostate carcinoma	EFO_0001663	PRS-CS	Parameters = auto; LD reference (eur)	GRCh37	1111493	0	NR	PGP000118	32991828	10.1016/j.ajhg.2020.08.025	TRUE	European:100	European:100	European:100	https://ftp.ebi.ac.uk/pub/databases/spot/pgs/scores/PGS000570/ScoringFiles/PGS000570.txt.gz	PGS obtained from the Catalog should be cited appropriately, and used in accordance with any licensing restrictions set by the authors. See EBI Terms of Use (https://www.ebi.ac.uk/about/terms-of-use/) for additional details.
PGS000571	PRSWEB_PHECODE185_C3-PROSTATE_PT_MGI_20200608	Cancer of prostate	prostate carcinoma	EFO_0001663	P&T	LD Clumping (MAF >= 1%, r^2 <= 0.1) & P<=2.51e-06	GRCh37	100	0	NR	PGP000118	32991828	10.1016/j.ajhg.2020.08.025	TRUE	European:100	European:100	European:100	https://ftp.ebi.ac.uk/pub/databases/spot/pgs/scores/PGS000571/ScoringFiles/PGS000571.txt.gz	PGS obtained from the Catalog should be cited appropriately, and used in accordance with any licensing restrictions set by the authors. See EBI Terms of Use (https://www.ebi.ac.uk/about/terms-of-use/) for additional details.
PGS000572	PRSWEB_PHECODE185_C3-PROSTATE_LASSOSUM_MGI_20200608	Cancer of prostate	prostate carcinoma	EFO_0001663	Lassosum	s=0.5;Lambda=0.02336	GRCh37	1809	0	NR	PGP000118	32991828	10.1016/j.ajhg.2020.08.025	TRUE	European:100	European:100	European:100	https://ftp.ebi.ac.uk/pub/databases/spot/pgs/scores/PGS000572/ScoringFiles/PGS000572.txt.gz	PGS obtained from the Catalog should be cited appropriately, and used in accordance with any licensing restrictions set by the authors. See EBI Terms of Use (https://www.ebi.ac.uk/about/terms-of-use/) for additional details.
PGS000573	PRSWEB_PHECODE185_C61_P_5e-08_MGI_20200608	Cancer of prostate	prostate carcinoma	EFO_0001663	GWAS Hits	LD Clumping (MAF >= 1%, r^2 <= 0.1) & P<=5e-08	GRCh37	31	0	NR	PGP000118	32991828	10.1016/j.ajhg.2020.08.025	TRUE	European:100	European:100	European:100	https://ftp.ebi.ac.uk/pub/databases/spot/pgs/scores/PGS000573/ScoringFiles/PGS000573.txt.gz	PGS obtained from the Catalog should be cited appropriately, and used in accordance with any licensing restrictions set by the authors. See EBI Terms of Use (https://www.ebi.ac.uk/about/terms-of-use/) for additional details.
PGS000574	PRSWEB_PHECODE185_C61_PRS-CS_MGI_20200608	Cancer of prostate	prostate carcinoma	EFO_0001663	PRS-CS	Parameters = auto; LD reference (eur)	GRCh37	1111493	0	NR	PGP000118	32991828	10.1016/j.ajhg.2020.08.025	TRUE	European:100	European:100	European:100	https://ftp.ebi.ac.uk/pub/databases/spot/pgs/scores/PGS000574/ScoringFiles/PGS000574.txt.gz	PGS obtained from the Catalog should be cited appropriately, and used in accordance with any licensing restrictions set by the authors. See EBI Terms of Use (https://www.ebi.ac.uk/about/terms-of-use/) for additional details.
PGS000575	PRSWEB_PHECODE185_C61_PT_MGI_20200608	Cancer of prostate	prostate carcinoma	EFO_0001663	P&T	LD Clumping (MAF >= 1%, r^2 <= 0.1) & P<=5e-07	GRCh37	47	0	NR	PGP000118	32991828	10.1016/j.ajhg.2020.08.025	TRUE	European:100	European:100	European:100	https://ftp.ebi.ac.uk/pub/databases/spot/pgs/scores/PGS000575/ScoringFiles/PGS000575.txt.gz	PGS obtained from the Catalog should be cited appropriately, and used in accordance with any licensing restrictions set by the authors. See EBI Terms of Use (https://www.ebi.ac.uk/about/terms-of-use/) for additional details.
PGS000576	PRSWEB_PHECODE185_C61_LASSOSUM_MGI_20200608	Cancer of prostate	prostate carcinoma	EFO_0001663	Lassosum	s=0.5;Lambda=0.02976	GRCh37	905	0	NR	PGP000118	32991828	10.1016/j.ajhg.2020.08.025	TRUE	European:100	European:100	European:100	https://ftp.ebi.ac.uk/pub/databases/spot/pgs/scores/PGS000576/ScoringFiles/PGS000576.txt.gz	PGS obtained from the Catalog should be cited appropriately, and used in accordance with any licensing restrictions set by the authors. See EBI Terms of Use (https://www.ebi.ac.uk/about/terms-of-use/) for additional details.
PGS000577	PRSWEB_PHECODE185_GWAS-Catalog-r2019-05-03-X185_P_5e-08_MGI_20200608	Cancer of prostate	prostate carcinoma	EFO_0001663	GWAS Hits	LD Clumping (MAF >= 1%, r^2 <= 0.1) & P<=5e-08	GRCh37	117	0	NR	PGP000118	32991828	10.1016/j.ajhg.2020.08.025	TRUE	European:100	European:100	European:100	https://ftp.ebi.ac.uk/pub/databases/spot/pgs/scores/PGS000577/ScoringFiles/PGS000577.txt.gz	PGS obtained from the Catalog should be cited appropriately, and used in accordance with any licensing restrictions set by the authors. See EBI Terms of Use (https://www.ebi.ac.uk/about/terms-of-use/) for additional details.
PGS000578	PRSWEB_PHECODE185_GWAS-Catalog-r2019-05-03-X185_P_5e-08_UKB_20200608	Cancer of prostate	prostate carcinoma	EFO_0001663	GWAS Hits	LD Clumping (MAF >= 1%, r^2 <= 0.1) & P<=5e-08	GRCh37	117	0	NR	PGP000118	32991828	10.1016/j.ajhg.2020.08.025	TRUE	European:100	European:100	European:100	https://ftp.ebi.ac.uk/pub/databases/spot/pgs/scores/PGS000578/ScoringFiles/PGS000578.txt.gz	PGS obtained from the Catalog should be cited appropriately, and used in accordance with any licensing restrictions set by the authors. See EBI Terms of Use (https://www.ebi.ac.uk/about/terms-of-use/) for additional details.
PGS000579	PRSWEB_PHECODE185_GWAS-Catalog-r2019-05-03-X185_PT_MGI_20200608	Cancer of prostate	prostate carcinoma	EFO_0001663	P&T	LD Clumping (MAF >= 1%, r^2 <= 0.1) & P<=2.51e-07	GRCh37	122	0	NR	PGP000118	32991828	10.1016/j.ajhg.2020.08.025	TRUE	European:100	European:100	European:100	https://ftp.ebi.ac.uk/pub/databases/spot/pgs/scores/PGS000579/ScoringFiles/PGS000579.txt.gz	PGS obtained from the Catalog should be cited appropriately, and used in accordance with any licensing restrictions set by the authors. See EBI Terms of Use (https://www.ebi.ac.uk/about/terms-of-use/) for additional details.
PGS000580	PRSWEB_PHECODE185_GWAS-Catalog-r2019-05-03-X185_PT_UKB_20200608	Cancer of prostate	prostate carcinoma	EFO_0001663	P&T	LD Clumping (MAF >= 1%, r^2 <= 0.1) & P<=7.94e-08	GRCh37	118	0	NR	PGP000118	32991828	10.1016/j.ajhg.2020.08.025	TRUE	European:100	European:100	European:100	https://ftp.ebi.ac.uk/pub/databases/spot/pgs/scores/PGS000580/ScoringFiles/PGS000580.txt.gz	PGS obtained from the Catalog should be cited appropriately, and used in accordance with any licensing restrictions set by the authors. See EBI Terms of Use (https://www.ebi.ac.uk/about/terms-of-use/) for additional details.
PGS000581	PRSWEB_PHECODE185_Pca-PRACTICAL_P_5e-08_MGI_20200608	Cancer of prostate	prostate carcinoma	EFO_0001663	GWAS Hits	LD Clumping (MAF >= 1%, r^2 <= 0.1) & P<=5e-08	GRCh37	377	0	NR	PGP000118	32991828	10.1016/j.ajhg.2020.08.025	TRUE	European:100	European:100	European:100	https://ftp.ebi.ac.uk/pub/databases/spot/pgs/scores/PGS000581/ScoringFiles/PGS000581.txt.gz	PGS obtained from the Catalog should be cited appropriately, and used in accordance with any licensing restrictions set by the authors. See EBI Terms of Use (https://www.ebi.ac.uk/about/terms-of-use/) for additional details.
PGS000582	PRSWEB_PHECODE185_Pca-PRACTICAL_P_5e-08_UKB_20200608	Cancer of prostate	prostate carcinoma	EFO_0001663	GWAS Hits	LD Clumping (MAF >= 1%, r^2 <= 0.1) & P<=5e-08	GRCh37	377	0	NR	PGP000118	32991828	10.1016/j.ajhg.2020.08.025	TRUE	European:100	European:100	European:100	https://ftp.ebi.ac.uk/pub/databases/spot/pgs/scores/PGS000582/ScoringFiles/PGS000582.txt.gz	PGS obtained from the Catalog should be cited appropriately, and used in accordance with any licensing restrictions set by the authors. See EBI Terms of Use (https://www.ebi.ac.uk/about/terms-of-use/) for additional details.
PGS000583	PRSWEB_PHECODE185_Pca-PRACTICAL_PRS-CS_MGI_20200608	Cancer of prostate	prostate carcinoma	EFO_0001663	PRS-CS	Parameters = auto; LD reference (eur)	GRCh37	1119311	0	NR	PGP000118	32991828	10.1016/j.ajhg.2020.08.025	TRUE	European:100	European:100	European:100	https://ftp.ebi.ac.uk/pub/databases/spot/pgs/scores/PGS000583/ScoringFiles/PGS000583.txt.gz	PGS obtained from the Catalog should be cited appropriately, and used in accordance with any licensing restrictions set by the authors. See EBI Terms of Use (https://www.ebi.ac.uk/about/terms-of-use/) for additional details.
PGS000584	PRSWEB_PHECODE185_Pca-PRACTICAL_PRS-CS_UKB_20200608	Cancer of prostate	prostate carcinoma	EFO_0001663	PRS-CS	Parameters = auto; LD reference (eur)	GRCh37	1120596	0	NR	PGP000118	32991828	10.1016/j.ajhg.2020.08.025	TRUE	European:100	European:100	European:100	https://ftp.ebi.ac.uk/pub/databases/spot/pgs/scores/PGS000584/ScoringFiles/PGS000584.txt.gz	PGS obtained from the Catalog should be cited appropriately, and used in accordance with any licensing restrictions set by the authors. See EBI Terms of Use (https://www.ebi.ac.uk/about/terms-of-use/) for additional details.
PGS000585	PRSWEB_PHECODE185_Pca-PRACTICAL_PT_MGI_20200608	Cancer of prostate	prostate carcinoma	EFO_0001663	P&T	LD Clumping (MAF >= 1%, r^2 <= 0.1) & P<=6.31e-05	GRCh37	1301	0	NR	PGP000118	32991828	10.1016/j.ajhg.2020.08.025	TRUE	European:100	European:100	European:100	https://ftp.ebi.ac.uk/pub/databases/spot/pgs/scores/PGS000585/ScoringFiles/PGS000585.txt.gz	PGS obtained from the Catalog should be cited appropriately, and used in accordance with any licensing restrictions set by the authors. See EBI Terms of Use (https://www.ebi.ac.uk/about/terms-of-use/) for additional details.
PGS000586	PRSWEB_PHECODE185_Pca-PRACTICAL_PT_UKB_20200608	Cancer of prostate	prostate carcinoma	EFO_0001663	P&T	LD Clumping (MAF >= 1%, r^2 <= 0.1) & P<=2.51e-05	GRCh37	1023	0	NR	PGP000118	32991828	10.1016/j.ajhg.2020.08.025	TRUE	European:100	European:100	European:100	https://ftp.ebi.ac.uk/pub/databases/spot/pgs/scores/PGS000586/ScoringFiles/PGS000586.txt.gz	PGS obtained from the Catalog should be cited appropriately, and used in accordance with any licensing restrictions set by the authors. See EBI Terms of Use (https://www.ebi.ac.uk/about/terms-of-use/) for additional details.
PGS000587	PRSWEB_PHECODE185_Pca-PRACTICAL_LASSOSUM_MGI_20200608	Cancer of prostate	prostate carcinoma	EFO_0001663	Lassosum	s=0.5;Lambda=0.006952	GRCh37	26418	0	NR	PGP000118	32991828	10.1016/j.ajhg.2020.08.025	TRUE	European:100	European:100	European:100	https://ftp.ebi.ac.uk/pub/databases/spot/pgs/scores/PGS000587/ScoringFiles/PGS000587.txt.gz	PGS obtained from the Catalog should be cited appropriately, and used in accordance with any licensing restrictions set by the authors. See EBI Terms of Use (https://www.ebi.ac.uk/about/terms-of-use/) for additional details.
PGS000588	PRSWEB_PHECODE185_Pca-PRACTICAL_LASSOSUM_UKB_20200608	Cancer of prostate	prostate carcinoma	EFO_0001663	Lassosum	s=0.9;Lambda=0.005456	GRCh37	178259	0	NR	PGP000118	32991828	10.1016/j.ajhg.2020.08.025	TRUE	European:100	European:100	European:100	https://ftp.ebi.ac.uk/pub/databases/spot/pgs/scores/PGS000588/ScoringFiles/PGS000588.txt.gz	PGS obtained from the Catalog should be cited appropriately, and used in accordance with any licensing restrictions set by the authors. See EBI Terms of Use (https://www.ebi.ac.uk/about/terms-of-use/) for additional details.
PGS000589	PRSWEB_PHECODE185_UKBB-SAIGE-HRC-X185_P_5e-08_MGI_20200608	Cancer of prostate	prostate carcinoma	EFO_0001663	GWAS Hits	LD Clumping (MAF >= 1%, r^2 <= 0.1) & P<=5e-08	GRCh37	42	0	NR	PGP000118	32991828	10.1016/j.ajhg.2020.08.025	TRUE	European:100	European:100	European:100	https://ftp.ebi.ac.uk/pub/databases/spot/pgs/scores/PGS000589/ScoringFiles/PGS000589.txt.gz	PGS obtained from the Catalog should be cited appropriately, and used in accordance with any licensing restrictions set by the authors. See EBI Terms of Use (https://www.ebi.ac.uk/about/terms-of-use/) for additional details.
PGS000590	PRSWEB_PHECODE185_UKBB-SAIGE-HRC-X185_PRS-CS_MGI_20200608	Cancer of prostate	prostate carcinoma	EFO_0001663	PRS-CS	Parameters = auto; LD reference (eur)	GRCh37	1119236	0	NR	PGP000118	32991828	10.1016/j.ajhg.2020.08.025	TRUE	European:100	European:100	European:100	https://ftp.ebi.ac.uk/pub/databases/spot/pgs/scores/PGS000590/ScoringFiles/PGS000590.txt.gz	PGS obtained from the Catalog should be cited appropriately, and used in accordance with any licensing restrictions set by the authors. See EBI Terms of Use (https://www.ebi.ac.uk/about/terms-of-use/) for additional details.
PGS000591	PRSWEB_PHECODE185_UKBB-SAIGE-HRC-X185_PT_MGI_20200608	Cancer of prostate	prostate carcinoma	EFO_0001663	P&T	LD Clumping (MAF >= 1%, r^2 <= 0.1) & P<=1.26e-06	GRCh37	80	0	NR	PGP000118	32991828	10.1016/j.ajhg.2020.08.025	TRUE	European:100	European:100	European:100	https://ftp.ebi.ac.uk/pub/databases/spot/pgs/scores/PGS000591/ScoringFiles/PGS000591.txt.gz	PGS obtained from the Catalog should be cited appropriately, and used in accordance with any licensing restrictions set by the authors. See EBI Terms of Use (https://www.ebi.ac.uk/about/terms-of-use/) for additional details.
PGS000592	PRSWEB_PHECODE185_UKBB-SAIGE-HRC-X185_LASSOSUM_MGI_20200608	Cancer of prostate	prostate carcinoma	EFO_0001663	Lassosum	s=0.5;Lambda=0.02336	GRCh37	1334	0	NR	PGP000118	32991828	10.1016/j.ajhg.2020.08.025	TRUE	European:100	European:100	European:100	https://ftp.ebi.ac.uk/pub/databases/spot/pgs/scores/PGS000592/ScoringFiles/PGS000592.txt.gz	PGS obtained from the Catalog should be cited appropriately, and used in accordance with any licensing restrictions set by the authors. See EBI Terms of Use (https://www.ebi.ac.uk/about/terms-of-use/) for additional details.
PGS000593	PRSWEB_PHECODE187_C3-MALE-GENITAL_P_5e-08_MGI_20200608	Cancer of other male genital organs	male reproductive organ cancer	EFO_0007355	GWAS Hits	LD Clumping (MAF >= 1%, r^2 <= 0.1) & P<=5e-08	GRCh37	45	0	NR	PGP000118	32991828	10.1016/j.ajhg.2020.08.025	TRUE	European:100	European:100	European:100	https://ftp.ebi.ac.uk/pub/databases/spot/pgs/scores/PGS000593/ScoringFiles/PGS000593.txt.gz	PGS obtained from the Catalog should be cited appropriately, and used in accordance with any licensing restrictions set by the authors. See EBI Terms of Use (https://www.ebi.ac.uk/about/terms-of-use/) for additional details.
PGS000594	PRSWEB_PHECODE187_C3-MALE-GENITAL_PT_MGI_20200608	Cancer of other male genital organs	male reproductive organ cancer	EFO_0007355	P&T	LD Clumping (MAF >= 1%, r^2 <= 0.1) & P<=3.98e-06	GRCh37	97	0	NR	PGP000118	32991828	10.1016/j.ajhg.2020.08.025	TRUE	European:100	European:100	European:100	https://ftp.ebi.ac.uk/pub/databases/spot/pgs/scores/PGS000594/ScoringFiles/PGS000594.txt.gz	PGS obtained from the Catalog should be cited appropriately, and used in accordance with any licensing restrictions set by the authors. See EBI Terms of Use (https://www.ebi.ac.uk/about/terms-of-use/) for additional details.
PGS000595	PRSWEB_PHECODE187.2_20001-1045_P_5e-08_MGI_20200608	Malignant neoplasm of testis	testicular carcinoma	EFO_0005088	GWAS Hits	LD Clumping (MAF >= 1%, r^2 <= 0.1) & P<=5e-08	GRCh37	9	0	NR	PGP000118	32991828	10.1016/j.ajhg.2020.08.025	TRUE	European:100	European:100	European:100	https://ftp.ebi.ac.uk/pub/databases/spot/pgs/scores/PGS000595/ScoringFiles/PGS000595.txt.gz	PGS obtained from the Catalog should be cited appropriately, and used in accordance with any licensing restrictions set by the authors. See EBI Terms of Use (https://www.ebi.ac.uk/about/terms-of-use/) for additional details.
PGS000596	PRSWEB_PHECODE187.2_20001-1045_PT_MGI_20200608	Malignant neoplasm of testis	testicular carcinoma	EFO_0005088	P&T	LD Clumping (MAF >= 1%, r^2 <= 0.1) & P<=5.01e-11	GRCh37	5	0	NR	PGP000118	32991828	10.1016/j.ajhg.2020.08.025	TRUE	European:100	European:100	European:100	https://ftp.ebi.ac.uk/pub/databases/spot/pgs/scores/PGS000596/ScoringFiles/PGS000596.txt.gz	PGS obtained from the Catalog should be cited appropriately, and used in accordance with any licensing restrictions set by the authors. See EBI Terms of Use (https://www.ebi.ac.uk/about/terms-of-use/) for additional details.
PGS000597	PRSWEB_PHECODE187.2_20001-1045_LASSOSUM_MGI_20200608	Malignant neoplasm of testis	testicular carcinoma	EFO_0005088	Lassosum	s=0.9;Lambda=0.07848	GRCh37	771	0	NR	PGP000118	32991828	10.1016/j.ajhg.2020.08.025	TRUE	European:100	European:100	European:100	https://ftp.ebi.ac.uk/pub/databases/spot/pgs/scores/PGS000597/ScoringFiles/PGS000597.txt.gz	PGS obtained from the Catalog should be cited appropriately, and used in accordance with any licensing restrictions set by the authors. See EBI Terms of Use (https://www.ebi.ac.uk/about/terms-of-use/) for additional details.
PGS000598	PRSWEB_PHECODE187.2_C3-TESTIS_P_5e-08_MGI_20200608	Malignant neoplasm of testis	testicular carcinoma	EFO_0005088	GWAS Hits	LD Clumping (MAF >= 1%, r^2 <= 0.1) & P<=5e-08	GRCh37	6	0	NR	PGP000118	32991828	10.1016/j.ajhg.2020.08.025	TRUE	European:100	European:100	European:100	https://ftp.ebi.ac.uk/pub/databases/spot/pgs/scores/PGS000598/ScoringFiles/PGS000598.txt.gz	PGS obtained from the Catalog should be cited appropriately, and used in accordance with any licensing restrictions set by the authors. See EBI Terms of Use (https://www.ebi.ac.uk/about/terms-of-use/) for additional details.
PGS000599	PRSWEB_PHECODE187.2_C3-TESTIS_PT_MGI_20200608	Malignant neoplasm of testis	testicular carcinoma	EFO_0005088	P&T	LD Clumping (MAF >= 1%, r^2 <= 0.1) & P<=1e-05	GRCh37	31	0	NR	PGP000118	32991828	10.1016/j.ajhg.2020.08.025	TRUE	European:100	European:100	European:100	https://ftp.ebi.ac.uk/pub/databases/spot/pgs/scores/PGS000599/ScoringFiles/PGS000599.txt.gz	PGS obtained from the Catalog should be cited appropriately, and used in accordance with any licensing restrictions set by the authors. See EBI Terms of Use (https://www.ebi.ac.uk/about/terms-of-use/) for additional details.
PGS000600	PRSWEB_PHECODE187.2_C3-TESTIS_LASSOSUM_MGI_20200608	Malignant neoplasm of testis	testicular carcinoma	EFO_0005088	Lassosum	s=0.9;Lambda=0.1	GRCh37	250	0	NR	PGP000118	32991828	10.1016/j.ajhg.2020.08.025	TRUE	European:100	European:100	European:100	https://ftp.ebi.ac.uk/pub/databases/spot/pgs/scores/PGS000600/ScoringFiles/PGS000600.txt.gz	PGS obtained from the Catalog should be cited appropriately, and used in accordance with any licensing restrictions set by the authors. See EBI Terms of Use (https://www.ebi.ac.uk/about/terms-of-use/) for additional details.
PGS000601	PRSWEB_PHECODE187.2_GWAS-Catalog-r2019-05-03-X187.2_P_5e-08_MGI_20200608	Malignant neoplasm of testis	testicular carcinoma	EFO_0005088	GWAS Hits	LD Clumping (MAF >= 1%, r^2 <= 0.1) & P<=5e-08	GRCh37	40	0	NR	PGP000118	32991828	10.1016/j.ajhg.2020.08.025	TRUE	European:100	European:100	European:100	https://ftp.ebi.ac.uk/pub/databases/spot/pgs/scores/PGS000601/ScoringFiles/PGS000601.txt.gz	PGS obtained from the Catalog should be cited appropriately, and used in accordance with any licensing restrictions set by the authors. See EBI Terms of Use (https://www.ebi.ac.uk/about/terms-of-use/) for additional details.
PGS000602	PRSWEB_PHECODE187.2_GWAS-Catalog-r2019-05-03-X187.2_P_5e-08_UKB_20200608	Malignant neoplasm of testis	testicular carcinoma	EFO_0005088	GWAS Hits	LD Clumping (MAF >= 1%, r^2 <= 0.1) & P<=5e-08	GRCh37	40	0	NR	PGP000118	32991828	10.1016/j.ajhg.2020.08.025	TRUE	European:100	European:100	European:100	https://ftp.ebi.ac.uk/pub/databases/spot/pgs/scores/PGS000602/ScoringFiles/PGS000602.txt.gz	PGS obtained from the Catalog should be cited appropriately, and used in accordance with any licensing restrictions set by the authors. See EBI Terms of Use (https://www.ebi.ac.uk/about/terms-of-use/) for additional details.
PGS000603	PRSWEB_PHECODE187.2_GWAS-Catalog-r2019-05-03-X187.2_PT_MGI_20200608	Malignant neoplasm of testis	testicular carcinoma	EFO_0005088	P&T	LD Clumping (MAF >= 1%, r^2 <= 0.1) & P<=2.51e-11	GRCh37	22	0	NR	PGP000118	32991828	10.1016/j.ajhg.2020.08.025	TRUE	European:100	European:100	European:100	https://ftp.ebi.ac.uk/pub/databases/spot/pgs/scores/PGS000603/ScoringFiles/PGS000603.txt.gz	PGS obtained from the Catalog should be cited appropriately, and used in accordance with any licensing restrictions set by the authors. See EBI Terms of Use (https://www.ebi.ac.uk/about/terms-of-use/) for additional details.
PGS000604	PRSWEB_PHECODE187.2_GWAS-Catalog-r2019-05-03-X187.2_PT_UKB_20200608	Malignant neoplasm of testis	testicular carcinoma	EFO_0005088	P&T	LD Clumping (MAF >= 1%, r^2 <= 0.1) & P<=5e-06	GRCh37	44	0	NR	PGP000118	32991828	10.1016/j.ajhg.2020.08.025	TRUE	European:100	European:100	European:100	https://ftp.ebi.ac.uk/pub/databases/spot/pgs/scores/PGS000604/ScoringFiles/PGS000604.txt.gz	PGS obtained from the Catalog should be cited appropriately, and used in accordance with any licensing restrictions set by the authors. See EBI Terms of Use (https://www.ebi.ac.uk/about/terms-of-use/) for additional details.
PGS000605	PRSWEB_PHECODE189.11_GWAS-Catalog-r2019-05-03-X189.11_P_5e-08_UKB_20200608	Malignant neoplasm of kidney, except pelvis	kidney cancer	MONDO_0002367	GWAS Hits	LD Clumping (MAF >= 1%, r^2 <= 0.1) & P<=5e-08	GRCh37	12	0	NR	PGP000118	32991828	10.1016/j.ajhg.2020.08.025	TRUE	European:100	European:100	European:100	https://ftp.ebi.ac.uk/pub/databases/spot/pgs/scores/PGS000605/ScoringFiles/PGS000605.txt.gz	PGS obtained from the Catalog should be cited appropriately, and used in accordance with any licensing restrictions set by the authors. See EBI Terms of Use (https://www.ebi.ac.uk/about/terms-of-use/) for additional details.
PGS000606	PRSWEB_PHECODE189.11_GWAS-Catalog-r2019-05-03-X189.11_PT_UKB_20200608	Malignant neoplasm of kidney, except pelvis	kidney cancer	MONDO_0002367	P&T	LD Clumping (MAF >= 1%, r^2 <= 0.1) & P<=5e-08	GRCh37	12	0	NR	PGP000118	32991828	10.1016/j.ajhg.2020.08.025	TRUE	European:100	European:100	European:100	https://ftp.ebi.ac.uk/pub/databases/spot/pgs/scores/PGS000606/ScoringFiles/PGS000606.txt.gz	PGS obtained from the Catalog should be cited appropriately, and used in accordance with any licensing restrictions set by the authors. See EBI Terms of Use (https://www.ebi.ac.uk/about/terms-of-use/) for additional details.
PGS000607	PRSWEB_PHECODE189.2_20001-1035_PRS-CS_MGI_20200608	Cancer of bladder	urinary bladder carcinoma	MONDO_0004986	PRS-CS	Parameters = auto; LD reference (eur)	GRCh37	1095241	0	NR	PGP000118	32991828	10.1016/j.ajhg.2020.08.025	TRUE	European:100	European:100	European:100	https://ftp.ebi.ac.uk/pub/databases/spot/pgs/scores/PGS000607/ScoringFiles/PGS000607.txt.gz	PGS obtained from the Catalog should be cited appropriately, and used in accordance with any licensing restrictions set by the authors. See EBI Terms of Use (https://www.ebi.ac.uk/about/terms-of-use/) for additional details.
PGS000608	PRSWEB_PHECODE189.2_C3-BLADDER_PRS-CS_MGI_20200608	Cancer of bladder	urinary bladder carcinoma	MONDO_0004986	PRS-CS	Parameters = auto; LD reference (eur)	GRCh37	1097063	0	NR	PGP000118	32991828	10.1016/j.ajhg.2020.08.025	TRUE	European:100	European:100	European:100	https://ftp.ebi.ac.uk/pub/databases/spot/pgs/scores/PGS000608/ScoringFiles/PGS000608.txt.gz	PGS obtained from the Catalog should be cited appropriately, and used in accordance with any licensing restrictions set by the authors. See EBI Terms of Use (https://www.ebi.ac.uk/about/terms-of-use/) for additional details.
PGS000609	PRSWEB_PHECODE189.2_C67_LASSOSUM_MGI_20200608	Cancer of bladder	urinary bladder carcinoma	MONDO_0004986	Lassosum	s=1;Lambda=0.04833	GRCh37	1130	0	NR	PGP000118	32991828	10.1016/j.ajhg.2020.08.025	TRUE	European:100	European:100	European:100	https://ftp.ebi.ac.uk/pub/databases/spot/pgs/scores/PGS000609/ScoringFiles/PGS000609.txt.gz	PGS obtained from the Catalog should be cited appropriately, and used in accordance with any licensing restrictions set by the authors. See EBI Terms of Use (https://www.ebi.ac.uk/about/terms-of-use/) for additional details.
PGS000610	PRSWEB_PHECODE189.2_GWAS-Catalog-r2019-05-03-X189.2_P_5e-08_MGI_20200608	Cancer of bladder	urinary bladder carcinoma	MONDO_0004986	GWAS Hits	LD Clumping (MAF >= 1%, r^2 <= 0.1) & P<=5e-08	GRCh37	13	0	NR	PGP000118	32991828	10.1016/j.ajhg.2020.08.025	TRUE	European:100	European:100	European:100	https://ftp.ebi.ac.uk/pub/databases/spot/pgs/scores/PGS000610/ScoringFiles/PGS000610.txt.gz	PGS obtained from the Catalog should be cited appropriately, and used in accordance with any licensing restrictions set by the authors. See EBI Terms of Use (https://www.ebi.ac.uk/about/terms-of-use/) for additional details.
PGS000611	PRSWEB_PHECODE189.2_GWAS-Catalog-r2019-05-03-X189.2_P_5e-08_UKB_20200608	Cancer of bladder	urinary bladder carcinoma	MONDO_0004986	GWAS Hits	LD Clumping (MAF >= 1%, r^2 <= 0.1) & P<=5e-08	GRCh37	13	0	NR	PGP000118	32991828	10.1016/j.ajhg.2020.08.025	TRUE	European:100	European:100	European:100	https://ftp.ebi.ac.uk/pub/databases/spot/pgs/scores/PGS000611/ScoringFiles/PGS000611.txt.gz	PGS obtained from the Catalog should be cited appropriately, and used in accordance with any licensing restrictions set by the authors. See EBI Terms of Use (https://www.ebi.ac.uk/about/terms-of-use/) for additional details.
PGS000612	PRSWEB_PHECODE189.2_GWAS-Catalog-r2019-05-03-X189.2_PT_MGI_20200608	Cancer of bladder	urinary bladder carcinoma	MONDO_0004986	P&T	LD Clumping (MAF >= 1%, r^2 <= 0.1) & P<=5e-08	GRCh37	13	0	NR	PGP000118	32991828	10.1016/j.ajhg.2020.08.025	TRUE	European:100	European:100	European:100	https://ftp.ebi.ac.uk/pub/databases/spot/pgs/scores/PGS000612/ScoringFiles/PGS000612.txt.gz	PGS obtained from the Catalog should be cited appropriately, and used in accordance with any licensing restrictions set by the authors. See EBI Terms of Use (https://www.ebi.ac.uk/about/terms-of-use/) for additional details.
PGS000613	PRSWEB_PHECODE189.2_GWAS-Catalog-r2019-05-03-X189.2_PT_UKB_20200608	Cancer of bladder	urinary bladder carcinoma	MONDO_0004986	P&T	LD Clumping (MAF >= 1%, r^2 <= 0.1) & P<=7e-07	GRCh37	15	0	NR	PGP000118	32991828	10.1016/j.ajhg.2020.08.025	TRUE	European:100	European:100	European:100	https://ftp.ebi.ac.uk/pub/databases/spot/pgs/scores/PGS000613/ScoringFiles/PGS000613.txt.gz	PGS obtained from the Catalog should be cited appropriately, and used in accordance with any licensing restrictions set by the authors. See EBI Terms of Use (https://www.ebi.ac.uk/about/terms-of-use/) for additional details.
PGS000614	PRSWEB_PHECODE189.2_UKBB-SAIGE-HRC-X189.2_PRS-CS_MGI_20200608	Cancer of bladder	urinary bladder carcinoma	MONDO_0004986	PRS-CS	Parameters = auto; LD reference (eur)	GRCh37	1119238	0	NR	PGP000118	32991828	10.1016/j.ajhg.2020.08.025	TRUE	European:100	European:100	European:100	https://ftp.ebi.ac.uk/pub/databases/spot/pgs/scores/PGS000614/ScoringFiles/PGS000614.txt.gz	PGS obtained from the Catalog should be cited appropriately, and used in accordance with any licensing restrictions set by the authors. See EBI Terms of Use (https://www.ebi.ac.uk/about/terms-of-use/) for additional details.
PGS000615	PRSWEB_PHECODE189.2_UKBB-SAIGE-HRC-X189.2_PT_MGI_20200608	Cancer of bladder	urinary bladder carcinoma	MONDO_0004986	P&T	LD Clumping (MAF >= 1%, r^2 <= 0.1) & P<=3.98e-05	GRCh37	106	0	NR	PGP000118	32991828	10.1016/j.ajhg.2020.08.025	TRUE	European:100	European:100	European:100	https://ftp.ebi.ac.uk/pub/databases/spot/pgs/scores/PGS000615/ScoringFiles/PGS000615.txt.gz	PGS obtained from the Catalog should be cited appropriately, and used in accordance with any licensing restrictions set by the authors. See EBI Terms of Use (https://www.ebi.ac.uk/about/terms-of-use/) for additional details.
PGS000616	PRSWEB_PHECODE189.2_UKBB-SAIGE-HRC-X189.2_LASSOSUM_MGI_20200608	Cancer of bladder	urinary bladder carcinoma	MONDO_0004986	Lassosum	s=1;Lambda=0.02976	GRCh37	24359	0	NR	PGP000118	32991828	10.1016/j.ajhg.2020.08.025	TRUE	European:100	European:100	European:100	https://ftp.ebi.ac.uk/pub/databases/spot/pgs/scores/PGS000616/ScoringFiles/PGS000616.txt.gz	PGS obtained from the Catalog should be cited appropriately, and used in accordance with any licensing restrictions set by the authors. See EBI Terms of Use (https://www.ebi.ac.uk/about/terms-of-use/) for additional details.
PGS000617	PRSWEB_PHECODE190_20001-1030_PRS-CS_MGI_20200608	Cancer of eye	ocular cancer	MONDO_0002236	PRS-CS	Parameters = auto; LD reference (eur)	GRCh37	834009	0	NR	PGP000118	32991828	10.1016/j.ajhg.2020.08.025	TRUE	European:100	European:100	European:100	https://ftp.ebi.ac.uk/pub/databases/spot/pgs/scores/PGS000617/ScoringFiles/PGS000617.txt.gz	PGS obtained from the Catalog should be cited appropriately, and used in accordance with any licensing restrictions set by the authors. See EBI Terms of Use (https://www.ebi.ac.uk/about/terms-of-use/) for additional details.
PGS000618	PRSWEB_PHECODE191.1_GWAS-Catalog-r2019-05-03-X191.1_P_5e-08_UKB_20200608	Cancer of brain and nervous system	central nervous system cancer	EFO_0000326	GWAS Hits	LD Clumping (MAF >= 1%, r^2 <= 0.1) & P<=5e-08	GRCh37	23	0	NR	PGP000118	32991828	10.1016/j.ajhg.2020.08.025	TRUE	European:100	European:100	European:100	https://ftp.ebi.ac.uk/pub/databases/spot/pgs/scores/PGS000618/ScoringFiles/PGS000618.txt.gz	PGS obtained from the Catalog should be cited appropriately, and used in accordance with any licensing restrictions set by the authors. See EBI Terms of Use (https://www.ebi.ac.uk/about/terms-of-use/) for additional details.
PGS000619	PRSWEB_PHECODE191.1_GWAS-Catalog-r2019-05-03-X191.1_PT_UKB_20200608	Cancer of brain and nervous system	central nervous system cancer	EFO_0000326	P&T	LD Clumping (MAF >= 1%, r^2 <= 0.1) & P<=3.16e-09	GRCh37	19	0	NR	PGP000118	32991828	10.1016/j.ajhg.2020.08.025	TRUE	European:100	European:100	European:100	https://ftp.ebi.ac.uk/pub/databases/spot/pgs/scores/PGS000619/ScoringFiles/PGS000619.txt.gz	PGS obtained from the Catalog should be cited appropriately, and used in accordance with any licensing restrictions set by the authors. See EBI Terms of Use (https://www.ebi.ac.uk/about/terms-of-use/) for additional details.
PGS000620	PRSWEB_PHECODE191.11_C71_LASSOSUM_MGI_20200608	Cancer of brain	brain cancer	MONDO_0001657	Lassosum	s=0.9;Lambda=0.1	GRCh37	522	0	NR	PGP000118	32991828	10.1016/j.ajhg.2020.08.025	TRUE	European:100	European:100	European:100	https://ftp.ebi.ac.uk/pub/databases/spot/pgs/scores/PGS000620/ScoringFiles/PGS000620.txt.gz	PGS obtained from the Catalog should be cited appropriately, and used in accordance with any licensing restrictions set by the authors. See EBI Terms of Use (https://www.ebi.ac.uk/about/terms-of-use/) for additional details.
PGS000621	PRSWEB_PHECODE191.11_GWAS-Catalog-r2019-05-03-X191.11_P_5e-08_MGI_20200608	Cancer of brain	brain cancer	MONDO_0001657	GWAS Hits	LD Clumping (MAF >= 1%, r^2 <= 0.1) & P<=5e-08	GRCh37	12	0	NR	PGP000118	32991828	10.1016/j.ajhg.2020.08.025	TRUE	European:100	European:100	European:100	https://ftp.ebi.ac.uk/pub/databases/spot/pgs/scores/PGS000621/ScoringFiles/PGS000621.txt.gz	PGS obtained from the Catalog should be cited appropriately, and used in accordance with any licensing restrictions set by the authors. See EBI Terms of Use (https://www.ebi.ac.uk/about/terms-of-use/) for additional details.
PGS000622	PRSWEB_PHECODE191.11_GWAS-Catalog-r2019-05-03-X191.11_P_5e-08_UKB_20200608	Cancer of brain	brain cancer	MONDO_0001657	GWAS Hits	LD Clumping (MAF >= 1%, r^2 <= 0.1) & P<=5e-08	GRCh37	12	0	NR	PGP000118	32991828	10.1016/j.ajhg.2020.08.025	TRUE	European:100	European:100	European:100	https://ftp.ebi.ac.uk/pub/databases/spot/pgs/scores/PGS000622/ScoringFiles/PGS000622.txt.gz	PGS obtained from the Catalog should be cited appropriately, and used in accordance with any licensing restrictions set by the authors. See EBI Terms of Use (https://www.ebi.ac.uk/about/terms-of-use/) for additional details.
PGS000623	PRSWEB_PHECODE191.11_GWAS-Catalog-r2019-05-03-X191.11_PT_MGI_20200608	Cancer of brain	brain cancer	MONDO_0001657	P&T	LD Clumping (MAF >= 1%, r^2 <= 0.1) & P<=3.16e-09	GRCh37	11	0	NR	PGP000118	32991828	10.1016/j.ajhg.2020.08.025	TRUE	European:100	European:100	European:100	https://ftp.ebi.ac.uk/pub/databases/spot/pgs/scores/PGS000623/ScoringFiles/PGS000623.txt.gz	PGS obtained from the Catalog should be cited appropriately, and used in accordance with any licensing restrictions set by the authors. See EBI Terms of Use (https://www.ebi.ac.uk/about/terms-of-use/) for additional details.
PGS000624	PRSWEB_PHECODE191.11_GWAS-Catalog-r2019-05-03-X191.11_PT_UKB_20200608	Cancer of brain	brain cancer	MONDO_0001657	P&T	LD Clumping (MAF >= 1%, r^2 <= 0.1) & P<=5.01e-29	GRCh37	5	0	NR	PGP000118	32991828	10.1016/j.ajhg.2020.08.025	TRUE	European:100	European:100	European:100	https://ftp.ebi.ac.uk/pub/databases/spot/pgs/scores/PGS000624/ScoringFiles/PGS000624.txt.gz	PGS obtained from the Catalog should be cited appropriately, and used in accordance with any licensing restrictions set by the authors. See EBI Terms of Use (https://www.ebi.ac.uk/about/terms-of-use/) for additional details.
PGS000625	PRSWEB_PHECODE191.11_UKBB-SAIGE-HRC-X191.11_PT_MGI_20200608	Cancer of brain	brain cancer	MONDO_0001657	P&T	LD Clumping (MAF >= 1%, r^2 <= 0.1) & P<=2.51e-06	GRCh37	11	0	NR	PGP000118	32991828	10.1016/j.ajhg.2020.08.025	TRUE	European:100	European:100	European:100	https://ftp.ebi.ac.uk/pub/databases/spot/pgs/scores/PGS000625/ScoringFiles/PGS000625.txt.gz	PGS obtained from the Catalog should be cited appropriately, and used in accordance with any licensing restrictions set by the authors. See EBI Terms of Use (https://www.ebi.ac.uk/about/terms-of-use/) for additional details.
PGS000626	PRSWEB_PHECODE193_20001-1065_PT_MGI_20200608	Thyroid cancer	thyroid carcinoma	EFO_0002892	P&T	LD Clumping (MAF >= 1%, r^2 <= 0.1) & P<=3.98e-06	GRCh37	8	0	NR	PGP000118	32991828	10.1016/j.ajhg.2020.08.025	TRUE	European:100	European:100	European:100	https://ftp.ebi.ac.uk/pub/databases/spot/pgs/scores/PGS000626/ScoringFiles/PGS000626.txt.gz	PGS obtained from the Catalog should be cited appropriately, and used in accordance with any licensing restrictions set by the authors. See EBI Terms of Use (https://www.ebi.ac.uk/about/terms-of-use/) for additional details.
PGS000627	PRSWEB_PHECODE193_C3-THYROID-GLAND_PT_MGI_20200608	Thyroid cancer	thyroid carcinoma	EFO_0002892	P&T	LD Clumping (MAF >= 1%, r^2 <= 0.1) & P<=5e-06	GRCh37	11	0	NR	PGP000118	32991828	10.1016/j.ajhg.2020.08.025	TRUE	European:100	European:100	European:100	https://ftp.ebi.ac.uk/pub/databases/spot/pgs/scores/PGS000627/ScoringFiles/PGS000627.txt.gz	PGS obtained from the Catalog should be cited appropriately, and used in accordance with any licensing restrictions set by the authors. See EBI Terms of Use (https://www.ebi.ac.uk/about/terms-of-use/) for additional details.
PGS000628	PRSWEB_PHECODE193_C3-THYROID-GLAND_LASSOSUM_MGI_20200608	Thyroid cancer	thyroid carcinoma	EFO_0002892	Lassosum	s=1;Lambda=0.1	GRCh37	656	0	NR	PGP000118	32991828	10.1016/j.ajhg.2020.08.025	TRUE	European:100	European:100	European:100	https://ftp.ebi.ac.uk/pub/databases/spot/pgs/scores/PGS000628/ScoringFiles/PGS000628.txt.gz	PGS obtained from the Catalog should be cited appropriately, and used in accordance with any licensing restrictions set by the authors. See EBI Terms of Use (https://www.ebi.ac.uk/about/terms-of-use/) for additional details.
PGS000629	PRSWEB_PHECODE193_C73_PT_MGI_20200608	Thyroid cancer	thyroid carcinoma	EFO_0002892	P&T	LD Clumping (MAF >= 1%, r^2 <= 0.1) & P<=1.26e-06	GRCh37	8	0	NR	PGP000118	32991828	10.1016/j.ajhg.2020.08.025	TRUE	European:100	European:100	European:100	https://ftp.ebi.ac.uk/pub/databases/spot/pgs/scores/PGS000629/ScoringFiles/PGS000629.txt.gz	PGS obtained from the Catalog should be cited appropriately, and used in accordance with any licensing restrictions set by the authors. See EBI Terms of Use (https://www.ebi.ac.uk/about/terms-of-use/) for additional details.
PGS000630	PRSWEB_PHECODE193_GWAS-Catalog-r2019-05-03-X193_P_5e-08_MGI_20200608	Thyroid cancer	thyroid carcinoma	EFO_0002892	GWAS Hits	LD Clumping (MAF >= 1%, r^2 <= 0.1) & P<=5e-08	GRCh37	10	0	NR	PGP000118	32991828	10.1016/j.ajhg.2020.08.025	TRUE	European:100	European:100	European:100	https://ftp.ebi.ac.uk/pub/databases/spot/pgs/scores/PGS000630/ScoringFiles/PGS000630.txt.gz	PGS obtained from the Catalog should be cited appropriately, and used in accordance with any licensing restrictions set by the authors. See EBI Terms of Use (https://www.ebi.ac.uk/about/terms-of-use/) for additional details.
PGS000631	PRSWEB_PHECODE193_GWAS-Catalog-r2019-05-03-X193_P_5e-08_UKB_20200608	Thyroid cancer	thyroid carcinoma	EFO_0002892	GWAS Hits	LD Clumping (MAF >= 1%, r^2 <= 0.1) & P<=5e-08	GRCh37	10	0	NR	PGP000118	32991828	10.1016/j.ajhg.2020.08.025	TRUE	European:100	European:100	European:100	https://ftp.ebi.ac.uk/pub/databases/spot/pgs/scores/PGS000631/ScoringFiles/PGS000631.txt.gz	PGS obtained from the Catalog should be cited appropriately, and used in accordance with any licensing restrictions set by the authors. See EBI Terms of Use (https://www.ebi.ac.uk/about/terms-of-use/) for additional details.
PGS000632	PRSWEB_PHECODE193_GWAS-Catalog-r2019-05-03-X193_PT_MGI_20200608	Thyroid cancer	thyroid carcinoma	EFO_0002892	P&T	LD Clumping (MAF >= 1%, r^2 <= 0.1) & P<=3.16e-10	GRCh37	8	0	NR	PGP000118	32991828	10.1016/j.ajhg.2020.08.025	TRUE	European:100	European:100	European:100	https://ftp.ebi.ac.uk/pub/databases/spot/pgs/scores/PGS000632/ScoringFiles/PGS000632.txt.gz	PGS obtained from the Catalog should be cited appropriately, and used in accordance with any licensing restrictions set by the authors. See EBI Terms of Use (https://www.ebi.ac.uk/about/terms-of-use/) for additional details.
PGS000633	PRSWEB_PHECODE193_GWAS-Catalog-r2019-05-03-X193_PT_UKB_20200608	Thyroid cancer	thyroid carcinoma	EFO_0002892	P&T	LD Clumping (MAF >= 1%, r^2 <= 0.1) & P<=1e-16	GRCh37	5	0	NR	PGP000118	32991828	10.1016/j.ajhg.2020.08.025	TRUE	European:100	European:100	European:100	https://ftp.ebi.ac.uk/pub/databases/spot/pgs/scores/PGS000633/ScoringFiles/PGS000633.txt.gz	PGS obtained from the Catalog should be cited appropriately, and used in accordance with any licensing restrictions set by the authors. See EBI Terms of Use (https://www.ebi.ac.uk/about/terms-of-use/) for additional details.
PGS000634	PRSWEB_PHECODE193_UKBB-SAIGE-HRC-X193_PRS-CS_MGI_20200608	Thyroid cancer	thyroid carcinoma	EFO_0002892	PRS-CS	Parameters = auto; LD reference (eur)	GRCh37	1119238	0	NR	PGP000118	32991828	10.1016/j.ajhg.2020.08.025	TRUE	European:100	European:100	European:100	https://ftp.ebi.ac.uk/pub/databases/spot/pgs/scores/PGS000634/ScoringFiles/PGS000634.txt.gz	PGS obtained from the Catalog should be cited appropriately, and used in accordance with any licensing restrictions set by the authors. See EBI Terms of Use (https://www.ebi.ac.uk/about/terms-of-use/) for additional details.
PGS000635	PRSWEB_PHECODE193_UKBB-SAIGE-HRC-X193_PT_MGI_20200608	Thyroid cancer	thyroid carcinoma	EFO_0002892	P&T	LD Clumping (MAF >= 1%, r^2 <= 0.1) & P<=2e-06	GRCh37	5	0	NR	PGP000118	32991828	10.1016/j.ajhg.2020.08.025	TRUE	European:100	European:100	European:100	https://ftp.ebi.ac.uk/pub/databases/spot/pgs/scores/PGS000635/ScoringFiles/PGS000635.txt.gz	PGS obtained from the Catalog should be cited appropriately, and used in accordance with any licensing restrictions set by the authors. See EBI Terms of Use (https://www.ebi.ac.uk/about/terms-of-use/) for additional details.
PGS000636	PRSWEB_PHECODE193_UKBB-SAIGE-HRC-X193_LASSOSUM_MGI_20200608	Thyroid cancer	thyroid carcinoma	EFO_0002892	Lassosum	s=1;Lambda=0.1	GRCh37	954	0	NR	PGP000118	32991828	10.1016/j.ajhg.2020.08.025	TRUE	European:100	European:100	European:100	https://ftp.ebi.ac.uk/pub/databases/spot/pgs/scores/PGS000636/ScoringFiles/PGS000636.txt.gz	PGS obtained from the Catalog should be cited appropriately, and used in accordance with any licensing restrictions set by the authors. See EBI Terms of Use (https://www.ebi.ac.uk/about/terms-of-use/) for additional details.
PGS000637	PRSWEB_PHECODE201_20001-1052_PRS-CS_MGI_20200608	Hodgkin's disease	Hodgkins lymphoma	EFO_0000183	PRS-CS	Parameters = auto; LD reference (eur)	GRCh37	1047511	0	NR	PGP000118	32991828	10.1016/j.ajhg.2020.08.025	TRUE	European:100	European:100	European:100	https://ftp.ebi.ac.uk/pub/databases/spot/pgs/scores/PGS000637/ScoringFiles/PGS000637.txt.gz	PGS obtained from the Catalog should be cited appropriately, and used in accordance with any licensing restrictions set by the authors. See EBI Terms of Use (https://www.ebi.ac.uk/about/terms-of-use/) for additional details.
PGS000638	PRSWEB_PHECODE201_GWAS-Catalog-r2019-05-03-X201_P_5e-08_MGI_20200608	Hodgkin's disease	Hodgkins lymphoma	EFO_0000183	GWAS Hits	LD Clumping (MAF >= 1%, r^2 <= 0.1) & P<=5e-08	GRCh37	16	0	NR	PGP000118	32991828	10.1016/j.ajhg.2020.08.025	TRUE	European:100	European:100	European:100	https://ftp.ebi.ac.uk/pub/databases/spot/pgs/scores/PGS000638/ScoringFiles/PGS000638.txt.gz	PGS obtained from the Catalog should be cited appropriately, and used in accordance with any licensing restrictions set by the authors. See EBI Terms of Use (https://www.ebi.ac.uk/about/terms-of-use/) for additional details.
PGS000639	PRSWEB_PHECODE201_GWAS-Catalog-r2019-05-03-X201_PT_MGI_20200608	Hodgkin's disease	Hodgkins lymphoma	EFO_0000183	P&T	LD Clumping (MAF >= 1%, r^2 <= 0.1) & P<=1e-06	GRCh37	20	0	NR	PGP000118	32991828	10.1016/j.ajhg.2020.08.025	TRUE	European:100	European:100	European:100	https://ftp.ebi.ac.uk/pub/databases/spot/pgs/scores/PGS000639/ScoringFiles/PGS000639.txt.gz	PGS obtained from the Catalog should be cited appropriately, and used in accordance with any licensing restrictions set by the authors. See EBI Terms of Use (https://www.ebi.ac.uk/about/terms-of-use/) for additional details.
[truncated: 1,528 more rows]

## Sheet: c
Supplementary file 1c. Details of 165 PGS studied (87 for breast cancer, 26 for colorectal cancer, 13 for lung cancers and 39 for prostate cancer).
[truncated: 157 more rows]

[truncated: 4 more sheets: d, e, f, g]
